# Supplementary material for: Reactivity of the pentelidene complexes [Cp*E{W(CO)5}2] (E = P, As) towards dichalcogenides and chalcogenols – synthesis of novel chalcogenopentelidene complexes
Source: Royal Society of Chemistry journal article supplement (doi:10.1039/d1dt01866c), 2021-01-01
Supplement: d1dt01866c1.pdf [file d1dt01866c1.pdf]

## Supporting Information for the paper entitled:

# Reactivity of the Pentelidene Complexes [Cp\*E{W(CO)<sub>5</sub>}<sub>2</sub>] (E = P, As) towards Dichalcogenides and Chalcogenols - Synthesis of Novel Chalcogenopentelidene Complexes

Lena Rummel<sup>a</sup>, Giuliano Lassandro<sup>a</sup>, Michael Seidl<sup>a</sup>, Alexey Y. Timoshkin<sup>b</sup> and  
Manfred Scheer<sup>\*a</sup>

<sup>a</sup>Institute of Inorganic Chemistry, University of Regensburg, Universitaetsstrasse 31,  
93053 Regensburg, Germany

### Contents:

1. General Information
2. Experimental Data with NMR details
3. Crystallographic data
4. Computational details

## 1. General Information

### 1.1. Working techniques

The following reactions were carried out under an atmosphere of dry Nitrogen or Argon using standard Schlenk techniques. Traces of O<sub>2</sub> were eliminated by leading the inert gas (N<sub>2</sub> or Ar) through a copper catalyst heated to 145 °C, subsequently washing it with concentrated sulphuric acid and drying it with orange gel and phosphorus pentoxide.

Solvents were either collected from a solvent purification system (MBraun SPS 800) or dried, degassed and distilled according to standard techniques.

Before use, the diatomaceous earth required for filtration was stored at 110 °C. The silica gel 60 required for column chromatography (particle size 0.063-0.2 mm) was dried at 150 °C in vacuo for 3 d prior to use.

For photolytical reactions, a mercury vapor lamp from the Hanau company (type TQ 150) was used.

### 1.2. Methods of analysis

The NMR spectra were recorded on a BRUKER Avance 300 (<sup>1</sup>H: 300.13 MHz, <sup>13</sup>C: 75.48 MHz, <sup>31</sup>P: 121.49 MHz) or Avance 400 (<sup>1</sup>H: 400.13 MHz, <sup>13</sup>C: 100.61 MHz, <sup>31</sup>P: 161.98 MHz) spectrometer at room temperature unless stated otherwise. Chemical shifts  $\delta$  refer to external standards of tetramethylsilane (<sup>1</sup>H, <sup>13</sup>C NMR) and 85 % phosphoric acid (<sup>31</sup>P NMR, <sup>31</sup>P{<sup>1</sup>H} NMR), respectively, and are given in ppm. Coupling constants *J* are given in Hz

without consideration of absolute signs. Analysis, Simulations and graphic representations of the spectra were prepared with *TopSpin 3.0*<sup>[1]</sup>.

Infrared spectra were recorded in solution (CH<sub>2</sub>Cl<sub>2</sub>) with a ThermoScientific Nicolet iS5 spectrometer using the iD5 Transmission element or an ATR element equipped with a Ge crystal.

Mass spectra were recorded on a Jeol AccuTOF GCX (FD) spectrometer by the mass spectrometry department of the University of Regensburg or a ThermoQuest Finnigan MAT 95 spectrometer.

Elemental analysis was conducted by the microanalytics laboratory of the University of Regensburg with the Elementar Vario MICRO cube.

### 1.3. Starting Materials

The following substances were bought or synthesized according to standard techniques:

[Cp\*P{W(CO)<sub>5</sub>}<sub>2</sub>] (**1a**)<sup>[2]</sup>, [Cp\*As{W(CO)<sub>5</sub>}<sub>2</sub>] (**1b**)<sup>[2]</sup>, Ph<sub>2</sub>S<sub>2</sub>, PhSH, Ph<sub>2</sub>Se<sub>2</sub>, Mes<sub>2</sub>Se<sub>2</sub><sup>[3]</sup>, PhSeH, Mes<sub>2</sub>Te<sub>2</sub><sup>1</sup>, Tipp<sub>2</sub>Te<sub>2</sub><sup>[4]</sup>.

## 2. Experimental Data with NMR details

### 2.1 Synthesis of 2a

A solution of Ph<sub>2</sub>S<sub>2</sub> (44 mg, 0.2 mmol) in 20 mL of toluene was added dropwise to a solution of **1a** (163 mg, 0.2 mmol) in 30 mL of toluene at room temperature. The mixture was stirred for two days, whereupon the blue solution turned violet. The solvent was removed in vacuo and the residue recrystallised from hexane at -28 °C, to give green, shiny crystals of [PhSP{W(CO)<sub>5</sub>}<sub>2</sub>] (**2a**). NMR yield: 21 mg (13 %)

Photolytical reaction: A mixture of **1a** (163 mg, 0.2 mmol) and Ph<sub>2</sub>S<sub>2</sub> (44 mg, 0.2 mmol) in 50 mL of toluene was irradiated for 2 h with a TQ 150 Hg lamp until the reaction solution turned violet. The solution was then concentrated and stored at -28 °C, where a dark green powder of [PhSP{W(CO)<sub>5</sub>}<sub>2</sub>] (**2a**) could be obtained. NMR yield: 19 mg (12 %)

Chalkogenol reaction: A solution of PhSH (22 mg, 0.2 mmol) in 20 mL of toluene was added dropwise to a solution of **1a** (163 mg, 0.2 mmol) at -80 °C. The mixture was stirred and warmed to room temperature, whereupon the blue solution turned violet. After extraction of the dried reaction mixture with hexane, a few crystals of **2a** could be obtained by storing the concentrated hexane solution at -28 °C. NMR yield: 30 mg (19 %)

**2a:** <sup>1</sup>H NMR (CD<sub>2</sub>Cl<sub>2</sub>, 400 MHz): δ = 7.55 (m, 3H), 7.65 (m, 2H); <sup>31</sup>P{<sup>1</sup>H} NMR (CD<sub>2</sub>Cl<sub>2</sub>, 162 MHz): δ = 822.9 (s, <sup>1</sup>J<sub>P,W</sub> = 192 Hz); <sup>31</sup>P NMR (CD<sub>2</sub>Cl<sub>2</sub>, 162 MHz): δ = 822.9 (s, <sup>1</sup>J<sub>P,W</sub> = 192 Hz); IR (KBr) ν<sub>max</sub>/cm<sup>-1</sup> = 2962 w (CH), 2922 w (CH), 2852 w (CH), 2093 m (CO), 2055 s (CO), 1956 sh (CO), 1937 vs br (CO); MS (EI, 70eV): m/z (%): 787.7 (11) [M<sup>+</sup>], 703.8 (9) [M<sup>+</sup>-3CO], 678.7 (19) [P{W(CO)<sub>5</sub>}<sub>2</sub><sup>+</sup>], 650.7 (17) [P{W(CO)<sub>5</sub>}<sub>2</sub><sup>+</sup>-CO], 619.9 (29) [M<sup>+</sup>-6CO], 591.8 (37) [M<sup>+</sup>-7CO], 563.9 (29) [M<sup>+</sup>-8CO], 535.9 (28) [M<sup>+</sup>-9CO], 507.9 (60) [M<sup>+</sup>-10CO], 481.9 (22) [P{W(CO)<sub>5</sub>}<sub>2</sub><sup>+</sup>-7CO], 352.0 (14) [W(CO)<sub>6</sub><sup>+</sup>], 295.9 (12) [W(CO)<sub>6</sub><sup>+</sup>-2CO], 268.0 (23) [W(CO)<sub>6</sub><sup>+</sup>-3CO], 240.0 (9) [W(CO)<sub>6</sub><sup>+</sup>-4CO], 212.0 (8) [W(CO)<sub>6</sub><sup>+</sup>-5CO], 186.0 (12) [W(CO)<sub>6</sub><sup>+</sup>-6CO], 110.0 (33) [PhSH<sup>+</sup>], 78.1 (100) [Ph<sup>+</sup>]; elemental analysis calcd (%) for C<sub>16</sub>H<sub>5</sub>O<sub>10</sub>PSW<sub>2</sub> + 0.1 C<sub>5</sub>H<sub>12</sub>: C 24.98, H 0.80, S 4.03; found: C 25.43, H 0.68, S 3.99.

<sup>1</sup> Mes<sub>2</sub>Te<sub>2</sub> was synthesized analogously to Mes<sub>2</sub>Se<sub>2</sub>.

$^1\text{H}$  NMR spectrum of **2a**:

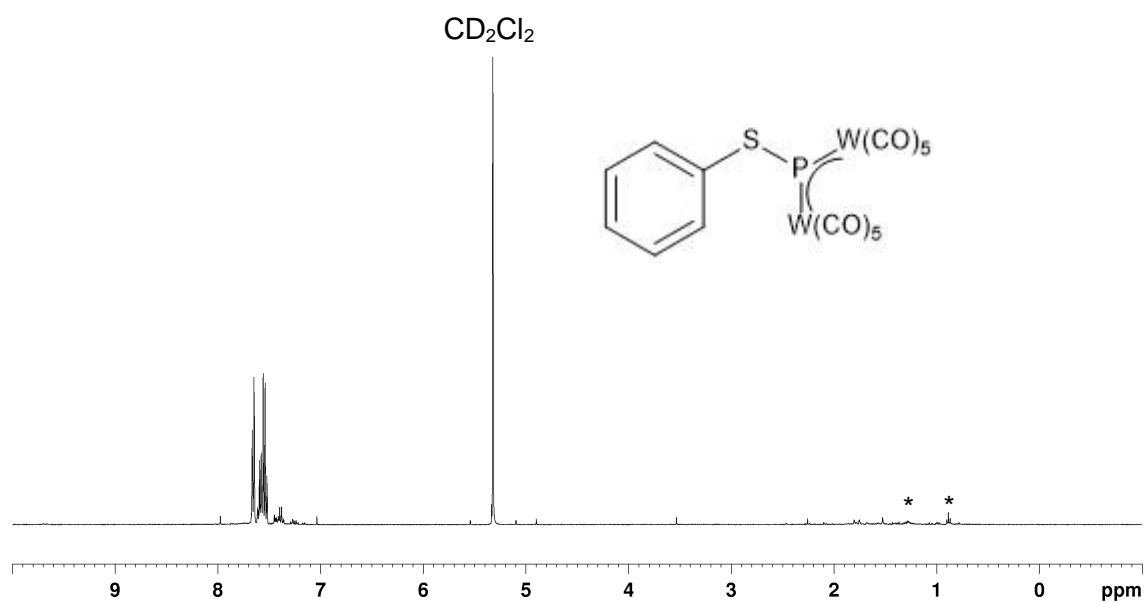

**Figure S1.**  $^1\text{H}$  NMR spectrum of **2a** in  $\text{CD}_2\text{Cl}_2$ . \* = pentane

$^{31}\text{P}\{^1\text{H}\}$  NMR spectrum of **2a**:

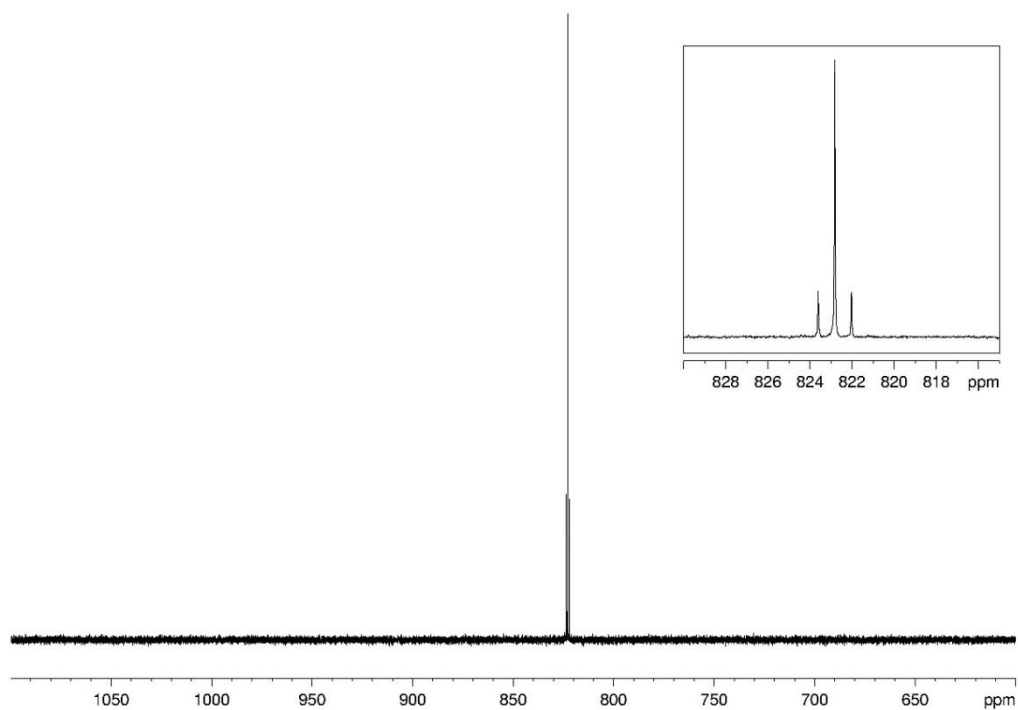

**Figure S2.**  $^{31}\text{P}\{^1\text{H}\}$  NMR spectrum of **2a** in  $\text{CD}_2\text{Cl}_2$ .

$^{31}\text{P}\{^1\text{H}\}$  NMR spectra of the reaction solutions:

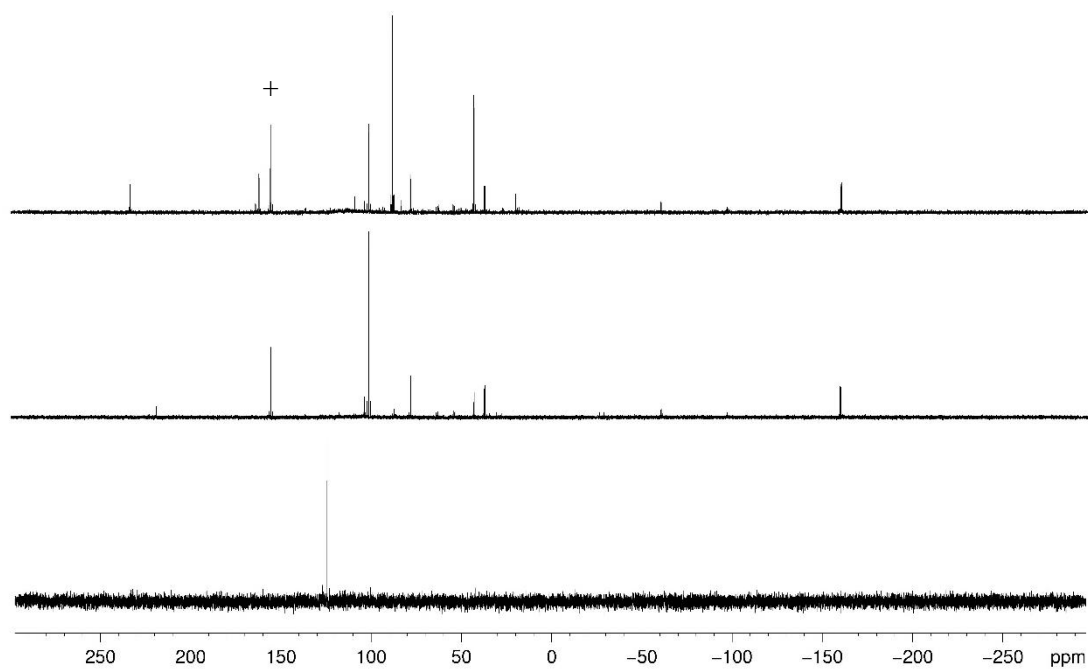

**Figure S3.** Section of the  $^{31}\text{P}\{^1\text{H}\}$  NMR spectra of the reaction mixtures of **1a** +  $\text{Ph}_2\text{S}_2$  in  $\text{CD}_2\text{Cl}_2$ . Bottom to top: Irradiation, stirring at room temp., heating to  $90^\circ\text{C}$ . + = impurity in **1a**. Rest of the products could not be identified.

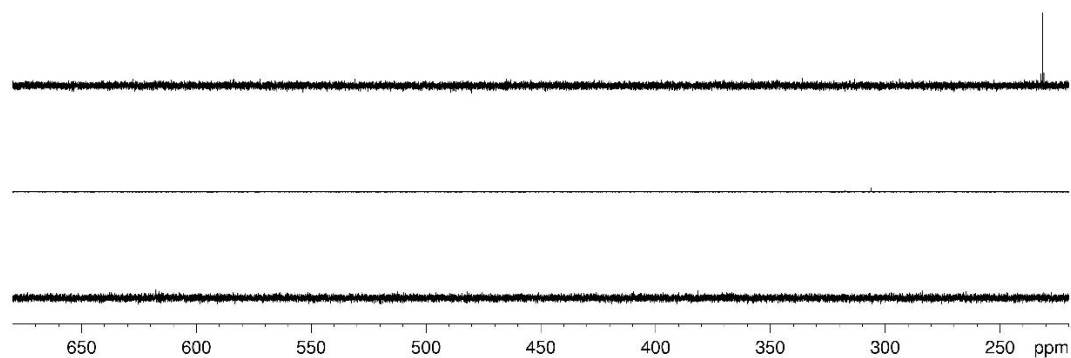

**Figure S4.** Section of the  $^{31}\text{P}\{^1\text{H}\}$  NMR spectra of the reaction mixtures of **1a** with  $\text{Ph}_2\text{S}_2$  in  $\text{CD}_2\text{Cl}_2$ . Bottom to top: Irradiation, stirring at room temp., heating to  $90^\circ\text{C}$ .

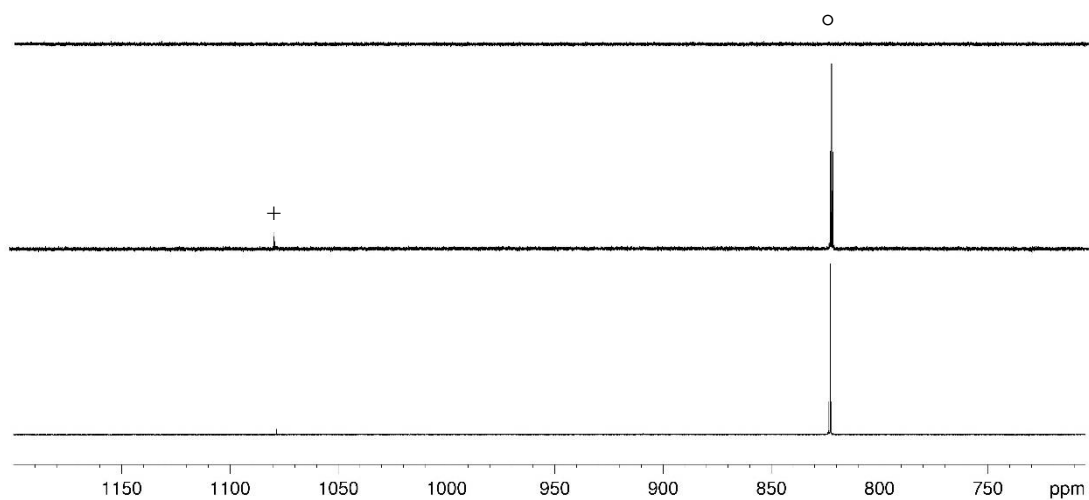

**Figure S5.** Part of the  $^{31}\text{P}\{^1\text{H}\}$  NMR spectra of the reaction mixtures of **1a** +  $\text{Ph}_2\text{S}_2$  in  $\text{CD}_2\text{Cl}_2$ . Bottom to top: Irradiation, stirring at room temp., heating to  $90\text{ }^\circ\text{C}$ . + = **1a**, ° = **2a**.

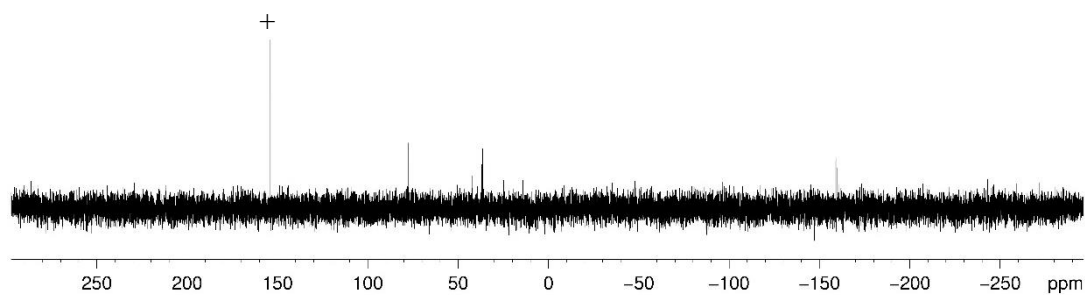

**Figure S6.** Part of the  $^{31}\text{P}\{^1\text{H}\}$  NMR spectrum of the reaction mixture of **1a** +  $\text{PhSH}$  in  $\text{CD}_2\text{Cl}_2$ . + = impurity in **1a**.

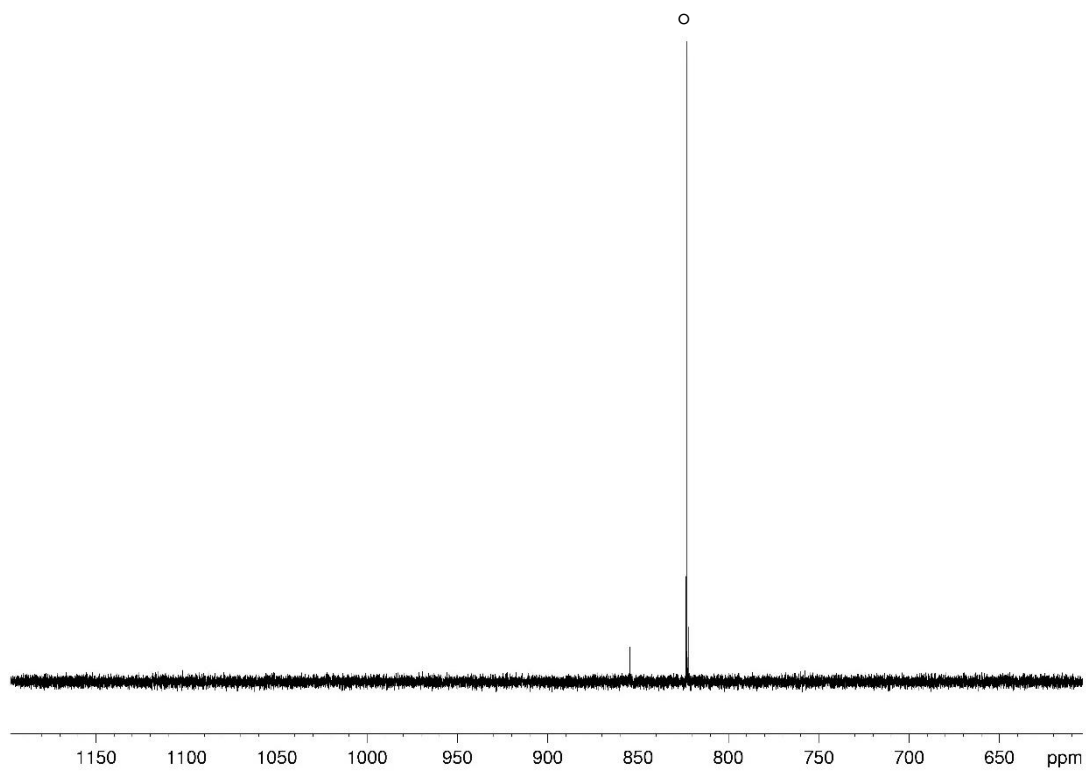

**Figure S7.** Part of the  $^{31}\text{P}\{^1\text{H}\}$  NMR spectrum of the reaction mixture of **1a** + PhSH in  $\text{CD}_2\text{Cl}_2$ .  $\delta = 2\mathbf{a}$ .

## 2.2 Reaction of **1b** with Ph<sub>2</sub>S<sub>2</sub>

A solution of Ph<sub>2</sub>S<sub>2</sub> (44 mg, 0.2 mmol) in 20 mL of toluene was added dropwise to a solution of **1b** (172 mg, 0.2 mmol) in 30 mL of toluene at room temperature. The mixture was stirred for two days, whereupon the blue solution turned violet. The solvent was removed in vacuo and the residue was dissolved again in hexane. After storing the solution at -28 °C, green shiny crystals of **2b** could be obtained. **Yield:** 17 mg (10 %).

Heating the reaction solution to 90 °C for 2h results in a brownish green solution. After removing the solvent and extracting the residue with hexane, the known compounds [PhS{W(CO)<sub>4</sub>}]<sub>2</sub> (green blocks) and (PhS)<sub>3</sub>As (brown plates) were obtained as a few crystals each at -28 °C from the hexane phase. Since there is no suitable NMR active nucleus present in the desired compound [PhSAs{W(CO)<sub>5</sub>}]<sub>2</sub> (**2b**), we cannot say whether **2b** is formed or not in this reaction.

**Chalkogenol reaction:** A solution of PhSH (0.02 mL, 22 mg, 0.2 mmol) in 5 mL of toluene was added dropwise to a solution of **1b** (172 mg, 0.2 mmol) in 20 mL of toluene at -80 °C. The solution was then warmed to -10 °C, where the blue solution turned violet. The solvent was removed in vacuo and the residue was extracted with hexane. Storing the violet hexane solution at -28 °C gave a few green shiny crystals of **2b**.

**2b:** <sup>1</sup>H NMR (C<sub>6</sub>D<sub>6</sub>, 400 MHz): δ = 7.01 (m, 3H), 7.19 (m, 2H); **IR** (KBr) ν<sub>max</sub>/cm<sup>-1</sup> = 2965 w (CH), 2918 w (CH), 2851 w (CH), 2091 m (CO), 2058 s (CO), 2017 sh (CO), 1970 sh (CO), 1933 vs (CO); **MS** (EI, 70eV): m/z (%): 831.5 (1) [M<sup>+</sup>], 803.6 (1) [M<sup>+</sup>-CO], 775.6 (1) [M<sup>+</sup>-2CO], 722.6 (1) [M<sup>+</sup>-PhS], 694.6 (1) [M<sup>+</sup>-PhS-CO], 666.6 (1) [M<sup>+</sup>-PhS-2CO], 635.7 (1) [M<sup>+</sup>-7CO], 607.8 (1) [M<sup>+</sup>-8CO], 579.7 (1) [M<sup>+</sup>-9CO], 551.8 (1) [M<sup>+</sup>-10CO], 442.8 (1) [M<sup>+</sup>-PhS-10CO], 351.9 (1) [W(CO)<sub>6</sub><sup>+</sup>], 295.9 (1) [W(CO)<sub>6</sub><sup>+</sup>-2CO], 268.0 (2) [W(CO)<sub>6</sub><sup>+</sup>-3CO], 239.9 (1) [W(CO)<sub>6</sub><sup>+</sup>-4CO], 212.0 (1) [W(CO)<sub>6</sub><sup>+</sup>-5CO]; **elemental analysis** calcd. (%) for C<sub>16</sub>H<sub>5</sub>AsO<sub>10</sub>SW<sub>2</sub>: C 23.10, H 0.61, S 3.85; found: C 23.33, H 0.70, S 3.82.

<sup>1</sup>H NMR spectrum:

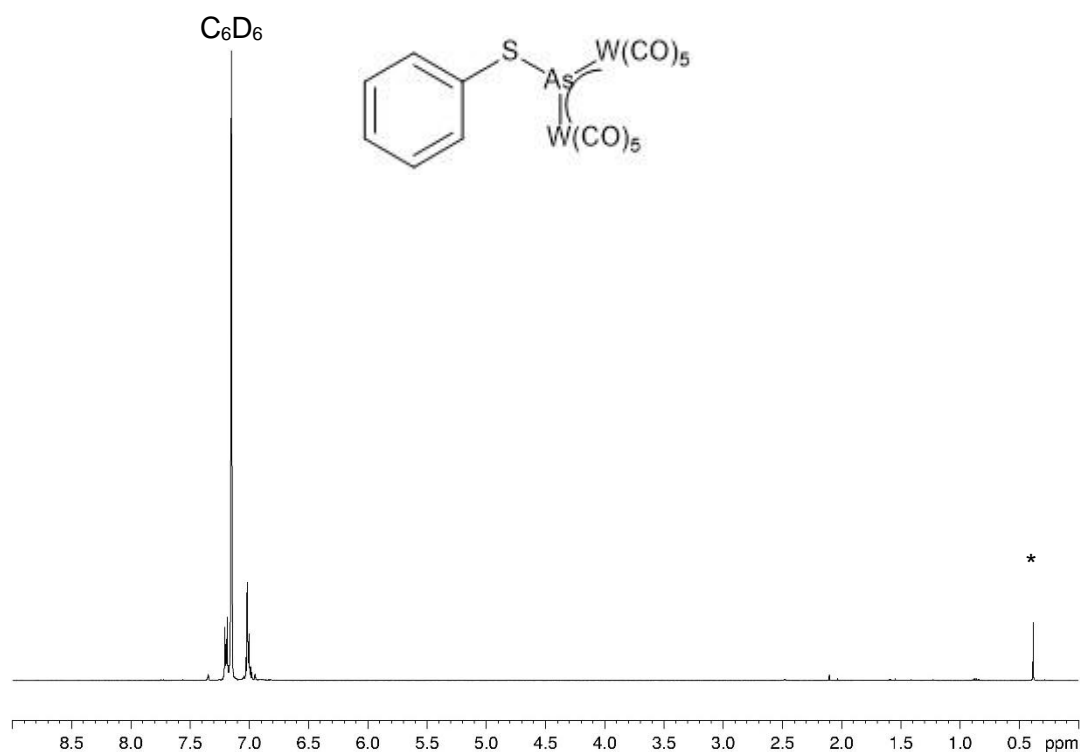

**Figure S8.** <sup>1</sup>H NMR spectrum of **2b** in C<sub>6</sub>D<sub>6</sub>. \* = grease

### 2.3 Synthesis of 3a-I

A solution of PhSeH (0,02 mL, 31 mg, 0.2 mmol) in 20 mL of toluene was added dropwise to a solution of **1a** (163 mg, 0.2 mmol) in 30 mL of toluene at -80 °C. The mixture was stirred until the cooling bath reached -30 °C and the solution turned violet. After analyzing the reaction solution spectroscopically, it was stored at -28 °C and a few dark red plates of [PhSeP{W(CO)<sub>5</sub>}<sub>2</sub>] (**3a-I**) could be obtained. The rest of the solution was then spectroscopically characterized.

**3a-I: Yield:** 27 mg (15 %); <sup>31</sup>P{<sup>1</sup>H} NMR (C<sub>6</sub>D<sub>6</sub>, 162 MHz): δ = 835.0 (s, <sup>1</sup>J<sub>P,W</sub> = 186 Hz, <sup>1</sup>J<sub>P,Se</sub> = 488 Hz); <sup>31</sup>P NMR (C<sub>6</sub>D<sub>6</sub>, 162 MHz): δ = 835.0 (s, <sup>1</sup>J<sub>P,W</sub> = 186 Hz, <sup>1</sup>J<sub>P,Se</sub> = 488 Hz).

<sup>1</sup>H NMR spectrum of the reaction solution:

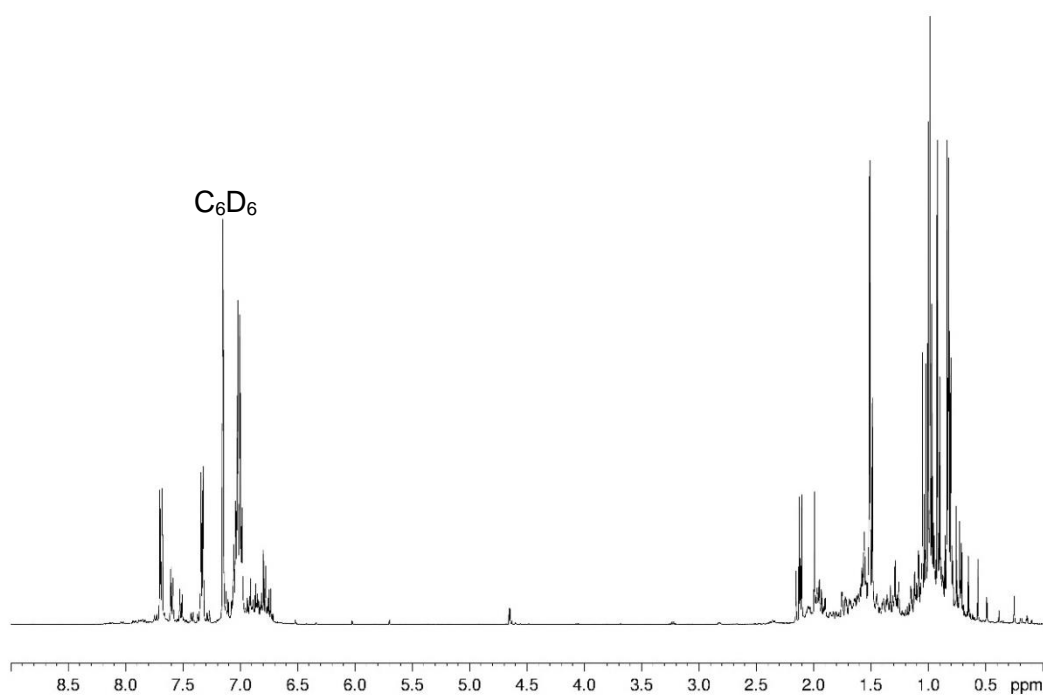

**Figure S9.** <sup>1</sup>H NMR spectrum of the reaction mixture of **1a** + PhSeH in C<sub>6</sub>D<sub>6</sub>

<sup>31</sup>P{<sup>1</sup>H} NMR spectrum of 3a-I:



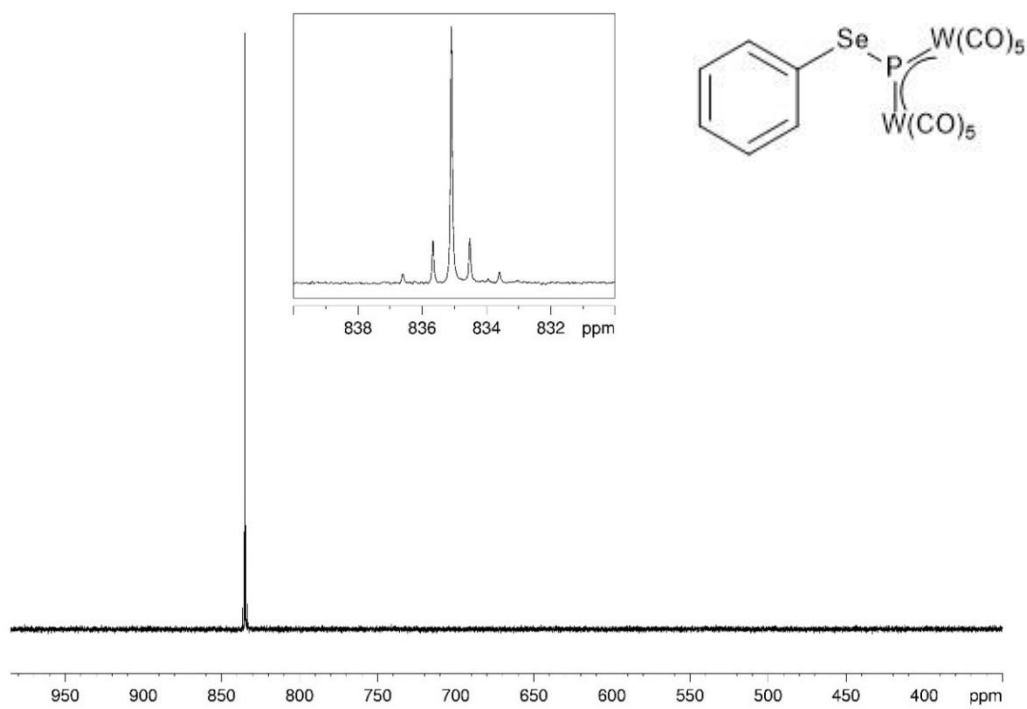

**Figure S10.**  $^{31}\text{P}\{^1\text{H}\}$  NMR spectrum of **3a-I** in  $\text{CD}_2\text{Cl}_2$ .

$^{31}\text{P}\{^1\text{H}\}$  NMR spectra of the reaction solution:

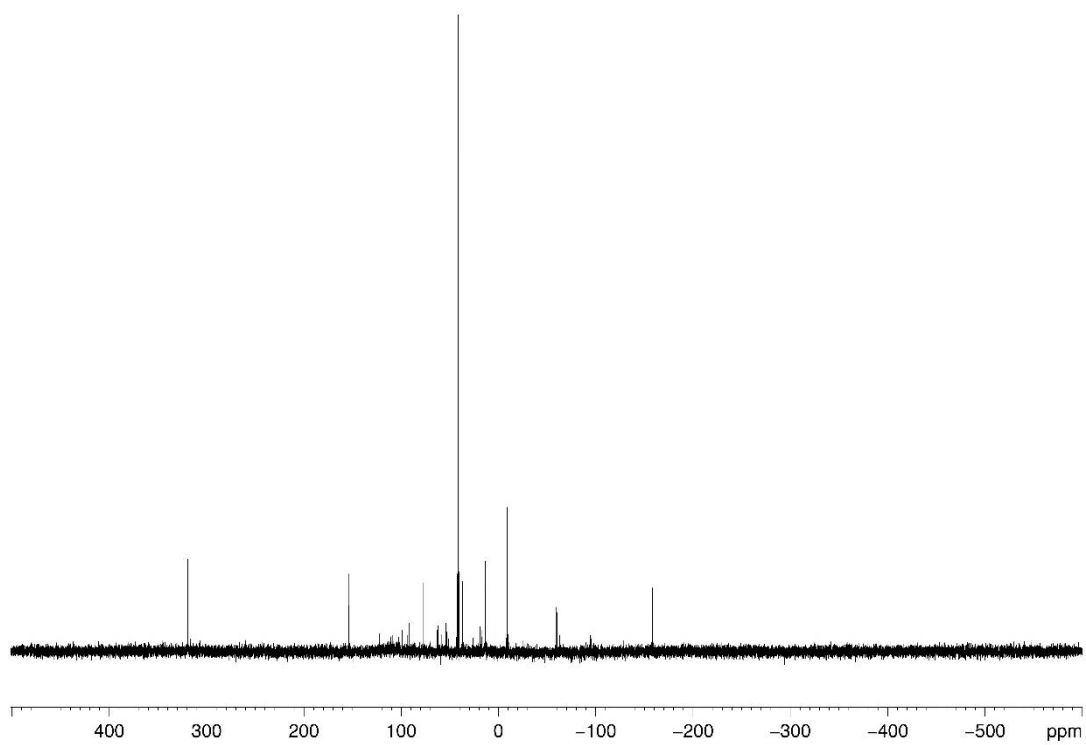

o

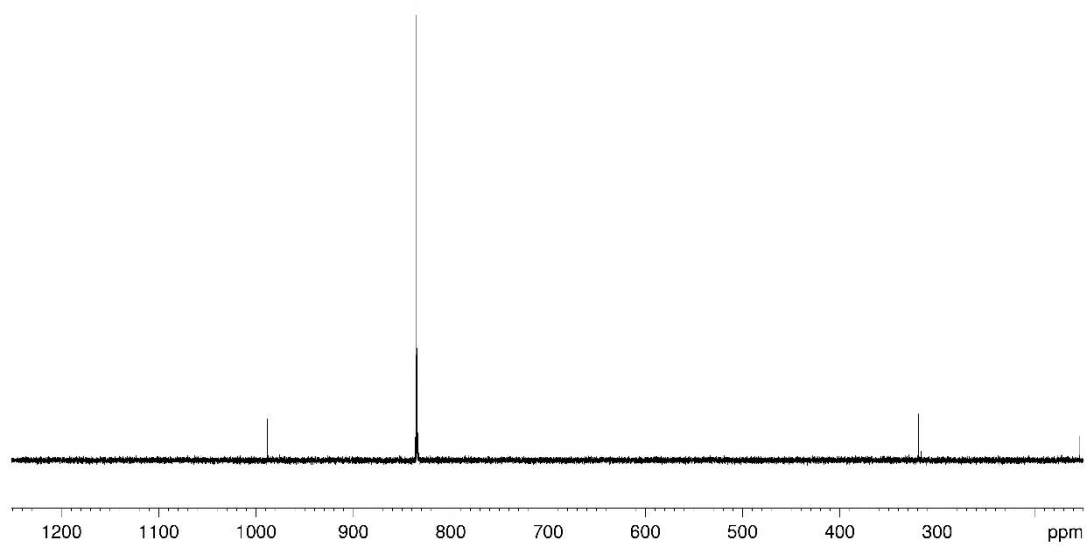

**Figure S11.**  $^{31}\text{P}\{^1\text{H}\}$  NMR spectra of the reaction mixture of **1a** + PhSeH in  $\text{CD}_2\text{Cl}_2$ .  $\circ = \mathbf{3a-I}$ .

## 2.4 Synthesis of 3a-II

A solution of Mes<sub>2</sub>Se<sub>2</sub> (160 mg, 0.4 mmol) in 20 mL of toluene was added dropwise to a solution of **1a** (326 mg, 0.4 mmol) in 30 mL of toluene at room temperature. The mixture was stirred for two days, whereupon the blue solution turned violet. After removing the solvent and recrystallizing from CH<sub>2</sub>Cl<sub>2</sub> at -28 °C, green, shiny crystals of [MesSeP{W(CO)<sub>5</sub>}<sub>2</sub>] (**3a-II**) could be obtained.

**3a-II**: Yield: 57 mg (15%); <sup>1</sup>H NMR (CD<sub>2</sub>Cl<sub>2</sub>, 400 MHz): δ = 2.32 (s, 3H, *p*-CH<sub>3</sub>), 2.44 (s, 6H, *o*-CH<sub>3</sub>), 7.10 (s, 2H, Mes); <sup>31</sup>P{<sup>1</sup>H} NMR (CD<sub>2</sub>Cl<sub>2</sub>, 162 MHz): δ = 854.3 (s, <sup>1</sup>J<sub>P,W</sub> = 184 Hz, <sup>1</sup>J<sub>P,Se</sub> = 507 Hz); <sup>31</sup>P NMR (CD<sub>2</sub>Cl<sub>2</sub>, 162 MHz): δ = 854.3 (s, <sup>1</sup>J<sub>P,W</sub> = 184 Hz, <sup>1</sup>J<sub>P,Se</sub> = 507 Hz); IR (KBr) ν<sub>max</sub>/cm<sup>-1</sup> = 2957 w (CH), 2919 w (CH), 2850 w (CH), 2090 m (CO), 2053 s (CO), 2015 sh (CO), 1956 vs (CO), 1936 vs (CO); MS (EI, 70eV): m/z (%): 877.8 (2) [M<sup>+</sup>], 678.9 (16) [P{W(CO)<sub>5</sub>}<sub>2</sub><sup>+</sup>], 651.0 (15) [P{W(CO)<sub>5</sub>}<sub>2</sub><sup>+</sup>-CO], 622.9 (8) [P{W(CO)<sub>5</sub>}<sub>2</sub><sup>+</sup>-2CO], 595.9 (17) [P{W(CO)<sub>5</sub>}<sub>2</sub><sup>+</sup>-3CO], 567.0 (4) [P{W(CO)<sub>5</sub>}<sub>2</sub><sup>+</sup>-4CO], 538.9 (3) [P{W(CO)<sub>5</sub>}<sub>2</sub><sup>+</sup>-5CO]; elemental analysis calcd. (%) for C<sub>19</sub>H<sub>11</sub>O<sub>10</sub>PSeW<sub>2</sub>: C 26.02, H 1.26; found: C 24.63, H 1.28.

<sup>1</sup>H NMR spectrum:

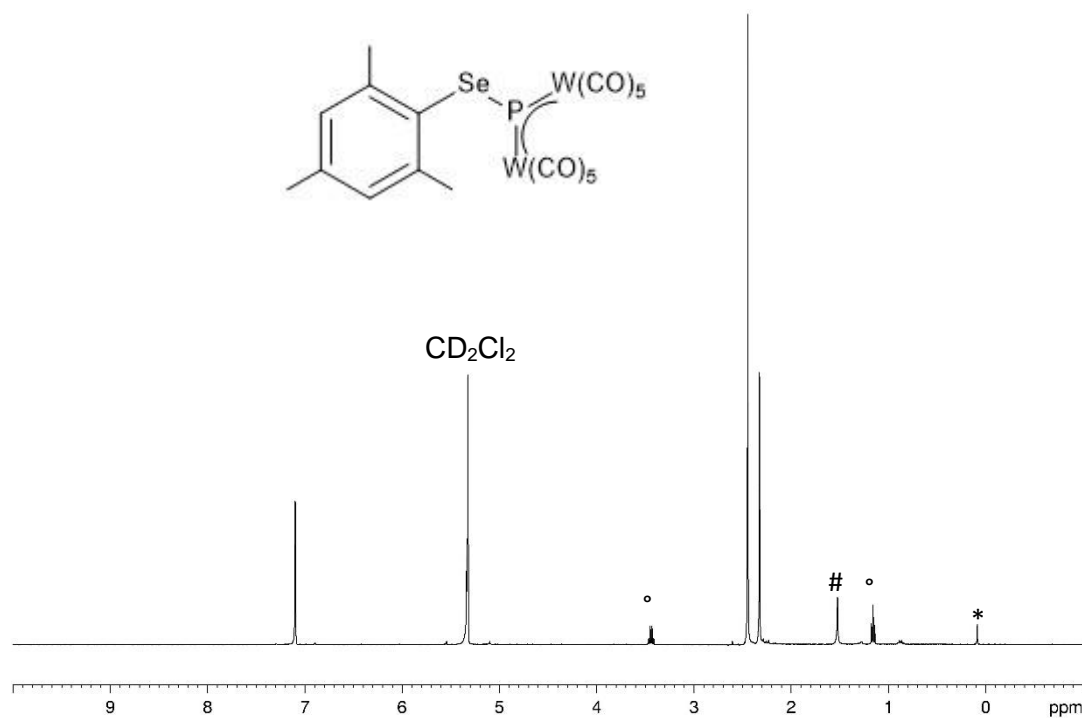

**Figure S12.** <sup>1</sup>H NMR spectrum of **3a-II** in CD<sub>2</sub>Cl<sub>2</sub>. ° = Et<sub>2</sub>O, # = H<sub>2</sub>O, \* = grease

$^{31}\text{P}\{^1\text{H}\}$  NMR spectrum:

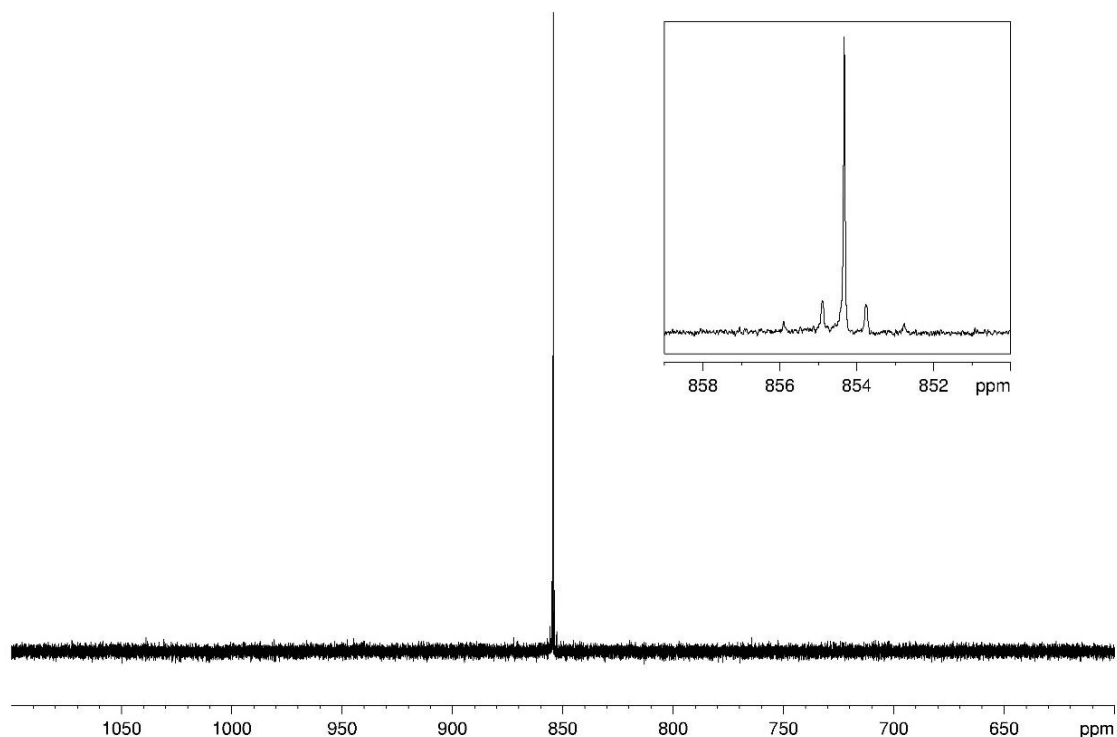

**Figure S13.**  $^{31}\text{P}\{^1\text{H}\}$  NMR spectrum of **3a-II** in  $\text{CD}_2\text{Cl}_2$ .

## 2.5 Synthesis of **3b**

A solution of  $\text{Mes}_2\text{Se}_2$  (80 mg, 0.2 mmol) in 20 mL of toluene was added dropwise to a solution of **1b** (172 mg, 0.2 mmol) in 30 mL of toluene at room temperature. The mixture was stirred for two days, whereupon the blue solution turned violet. After recrystallizing from  $\text{CH}_2\text{Cl}_2$  at  $-28\text{ }^\circ\text{C}$ , green, shiny crystals of  $[\text{MesSeAs}\{\text{W}(\text{CO})_5\}_2]$  (**3b**) could be obtained.

**3b:** Yield: 20 mg (11%);  $^1\text{H}$  NMR ( $\text{CDCl}_3$ , 400 MHz):  $\delta = 2.37$  (s, 3H, *p*- $\text{CH}_3$ ), 2.43 (s, 6H, *o*- $\text{CH}_3$ ), 7.10 (s, 2H, Mes); IR (KBr)  $\nu_{\text{max}}/\text{cm}^{-1} = 2964$  w (CH), 2919 w (CH), 2850 w (CH), 2088 m (CO), 2051 s (CO), 2014 sh (CO), 1998 sh (CO), 1954 vs (CO), 1935 vs (CO); MS (EI, 70eV):  $m/z$  (%): 922.0 (2) [ $\text{M}^+$ ], 722.9 (48) [ $\text{As}\{\text{W}(\text{CO})_5\}_2^+$ ], 694.8 (25) [ $\text{As}\{\text{W}(\text{CO})_5\}_2^+ - \text{CO}$ ], 666.8 (48) [ $\text{As}\{\text{W}(\text{CO})_5\}_2^+ - 2\text{CO}$ ], 639.9 (87) [ $\text{As}\{\text{W}(\text{CO})_5\}_2^+ - 3\text{CO}$ ]; elemental analysis calcd. (%) for  $\text{C}_{16}\text{H}_5\text{AsO}_{10}\text{SW}_2$ : C 24.78, H 1.20; found: C 25.77, H 1.31.

$^1\text{H}$  NMR spectrum:

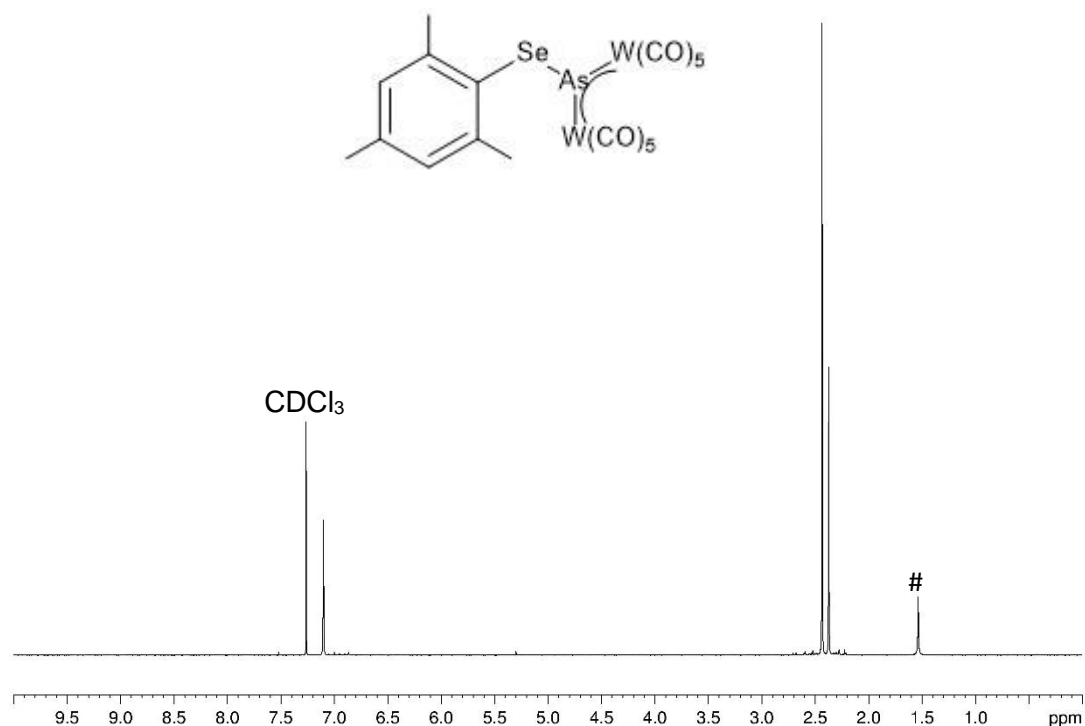

**Figure S14.**  $^1\text{H}$  NMR spectrum of **3b** in  $\text{CDCl}_3$ . # =  $\text{H}_2\text{O}$

## 2.6 Reaction of **1a** with $\text{Ph}_2\text{Se}_2$

A solution of  $\text{Ph}_2\text{Se}_2$  (36 mg, 0.2 mmol) in 10 mL toluene was added dropwise to a solution of **1a** (163 mg, 0.2 mmol) in 20 mL toluene at  $-80^\circ\text{C}$ . The solution is warmed to room temperature and stirred for 3 d, whereupon the blue solution turns brown. After analyzing the reaction solution via  $^{31}\text{P}\{^1\text{H}\}$  NMR spectroscopy, it was purified via column chromatography ( $\phi = 2.5$  cm,  $l = 10$  cm) using hexane/toluene in a 2:1 ratio.  $[\text{PhSeW}(\text{CO})_4]_2$  (**5**) crystallizes from the first of three fractions as green needles. Yield: 4 mg (2%)

**5:**  $^1\text{H}$ -NMR ( $\text{CD}_2\text{Cl}_2$ ):  $\delta = 7.31$  (m, 6H, CH), 7.46 (m, 4H, CH).

### Reaction solution:

$^{31}\text{P}\{^1\text{H}\}$  NMR ( $\text{CDCl}_3$ , 162 MHz):  $\delta = 41.0$  (s,  $^1J_{\text{P,W}} = 275$  Hz, 305 Hz  $^1J_{\text{P,Se}} = 580$  Hz, 607 Hz);

$^{31}\text{P}$  NMR ( $\text{CDCl}_3$ , 162 MHz):  $\delta = 41.0$  (s,  $^1J_{\text{P,W}} = 277$  Hz, 303 Hz  $^1J_{\text{P,Se}} = 582$  Hz, 610 Hz)

$^{31}\text{P}\{^1\text{H}\}$  NMR of the reaction solution:

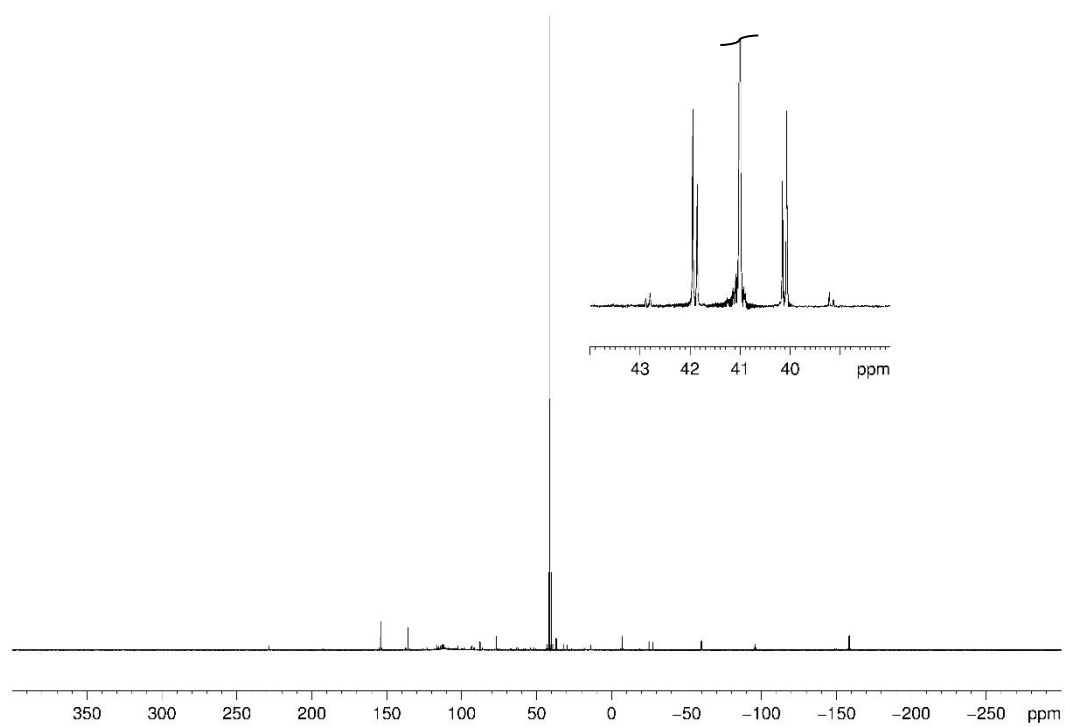

**Figure S15.**  $^{31}\text{P}\{^1\text{H}\}$  NMR spectrum of the reaction solution of **1a** +  $\text{Ph}_2\text{Se}_2$  in  $\text{CDCl}_3$ .

## 2.7 Reaction of **1a** and Mes<sub>2</sub>Te<sub>2</sub>

A solution of Mes<sub>2</sub>Te<sub>2</sub> (50 mg, 0.1 mmol) in 10 mL of toluene is added dropwise to a solution of **1a** (82 mg, 0.1 mmol) in 20 mL of toluene at -80 °C. The reaction mixture is stirred for 16 h and warmed to room temperature, whereupon the blue solution turns red. Before the solvent is removed in vacuo, the solution is analysed spectroscopically. [Mes(W{CO}<sub>5</sub>)Te]<sub>2</sub> (**6a**) crystallizes from a concentrated CH<sub>2</sub>Cl<sub>2</sub> solution at -28 °C as dark red blocks.

Yield: 6 mg (3%); <sup>1</sup>H NMR (CD<sub>2</sub>Cl<sub>2</sub>, 400 MHz): δ = 2.35 (s, 6H, *p*-CH<sub>3</sub>), 2.44 (s, 12H, *o*-CH<sub>3</sub>), 6.97 (s, 4H, C<sub>6</sub>H<sub>2</sub>).

Photolytic reaction: A solution of Mes<sub>2</sub>Te<sub>2</sub> (100 mg, 0.2 mmol) and **1a** (163 mg, 0.2 mmol) in 50 mL of toluene was irradiated for 20 min at 254 nm. The resulting violet solution was then characterized spectroscopically, wherein [MesTeP{W(CO)<sub>5</sub>}<sub>2</sub>] (**4a-I**) could be identified.

<sup>31</sup>P{<sup>1</sup>H} NMR (C<sub>6</sub>D<sub>6</sub>, 162 MHz): δ = 122.2 (s), 840.4 (s, <sup>1</sup>J<sub>P,W</sub> = 174 Hz, **4a-I**).

<sup>1</sup>H NMR spectrum of the reaction solution (Photolytic reaction):

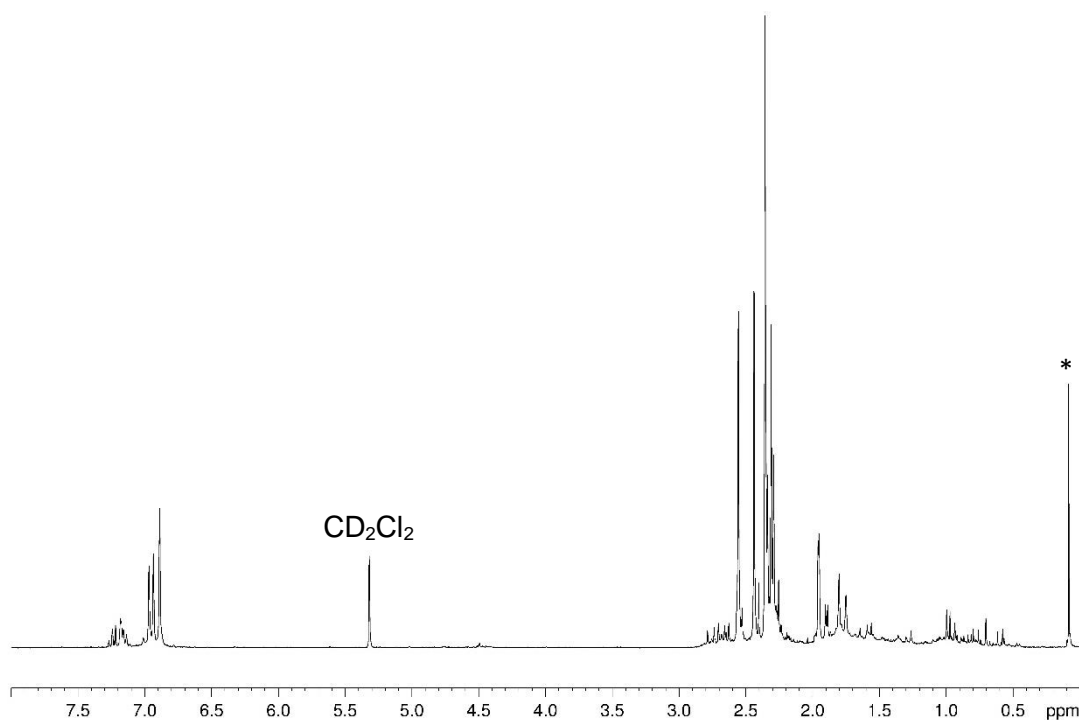

**Figure S16.** <sup>1</sup>H NMR spectrum of the reaction solution of **1a** + Mes<sub>2</sub>Te<sub>2</sub> in CD<sub>2</sub>Cl<sub>2</sub>. \* = grease.

$^{31}\text{P}\{^1\text{H}\}$  NMR spectra of the reaction solution (Photolytic reaction):

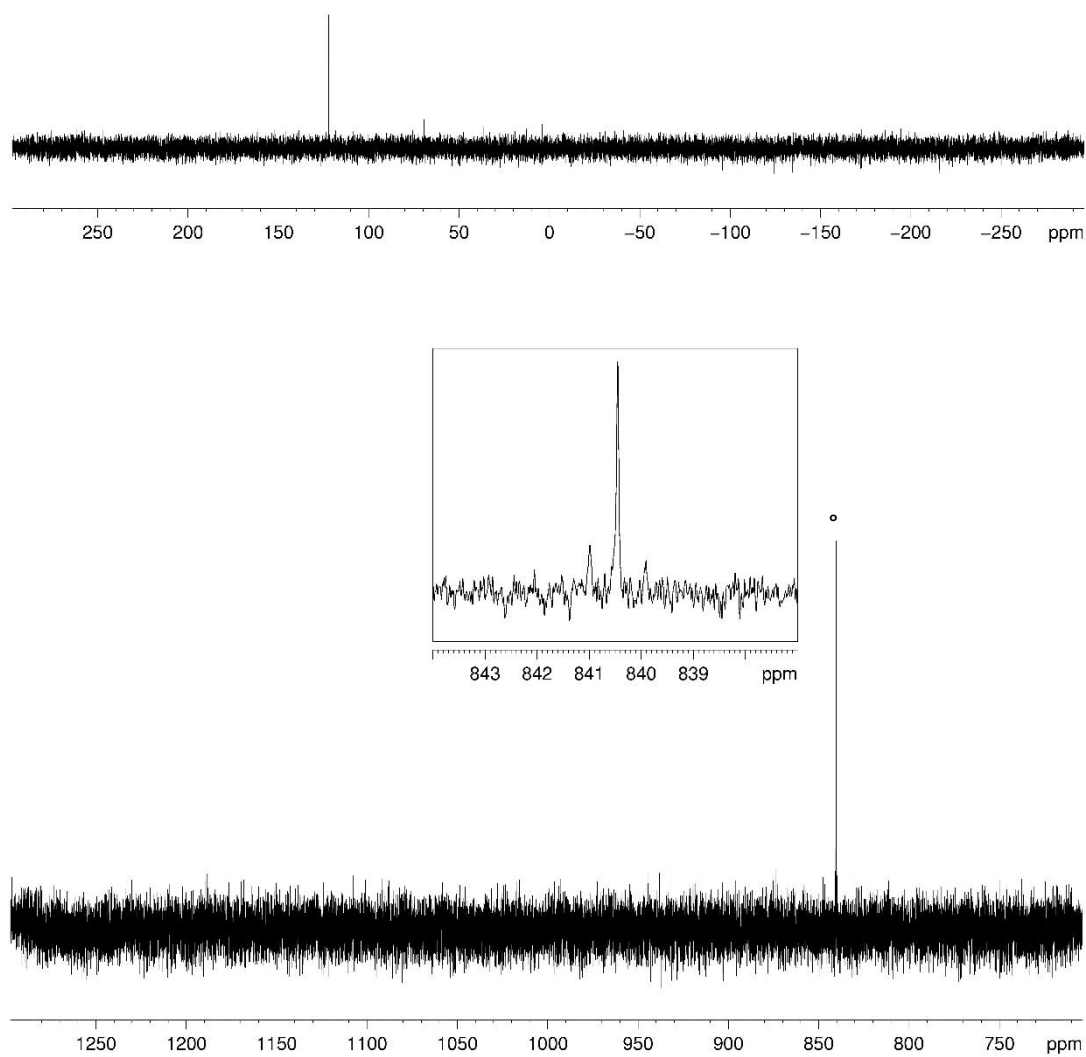

**Figure S17.**  $^{31}\text{P}\{^1\text{H}\}$  NMR spectra of the reaction mixture of **1a** +  $\text{Mes}_2\text{Te}_2$  in  $\text{CD}_2\text{Cl}_2$ .  $^\circ = \mathbf{4a-I}$ .



## 2.8 Reaction of **1b** and Mes<sub>2</sub>Te<sub>2</sub>

A mixture of **1b** (172 mg, 0.2 mmol) and Mes<sub>2</sub>Te<sub>2</sub> (100 mg, 0.2 mmol) in 50 mL of toluene was irradiated for 20 minutes at 254 nm until the reaction solution turned a reddish violet. The solvent was removed and the residue extracted with hexane. [Mes(W{CO}<sub>5</sub>)TeTeMes] (**6b**) was obtained from a concentrated solution at -28 °C as violet plates. Yield: few crystals.

**6b**: <sup>1</sup>H NMR (CD<sub>2</sub>Cl<sub>2</sub>, 400 MHz): δ = 2.27 (s, 2H, CH<sub>3</sub>), 2.44 (s, 2H, CH<sub>3</sub>), 2.56 (s, 1H, CH<sub>3</sub>), 2.81 (s, 4H, CH<sub>3</sub>), 6.93 (s, 2H, CH).

<sup>1</sup>H NMR spectrum of the reaction solution:

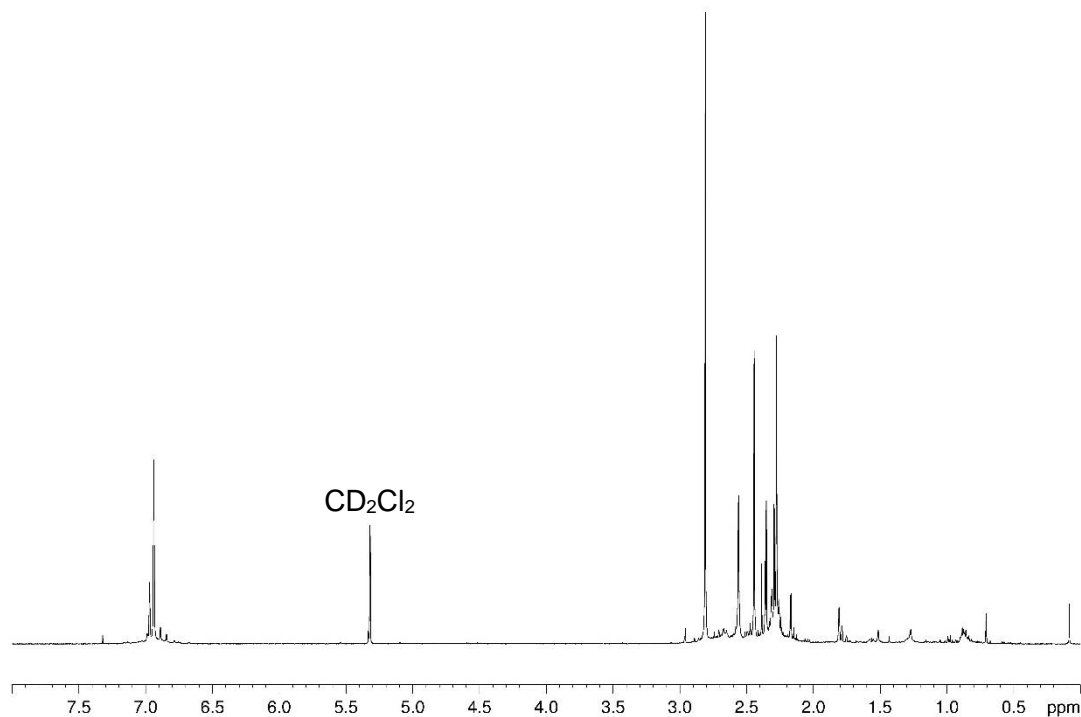

**Figure S18.** <sup>1</sup>H NMR spectrum of the reaction mixture of **1b** + Mes<sub>2</sub>Te<sub>2</sub> in CD<sub>2</sub>Cl<sub>2</sub>.

## 2.9 Reaction of **1a** with **Tipp<sub>2</sub>Te<sub>2</sub>**

A solution of **Tipp<sub>2</sub>Te<sub>2</sub>** (132 mg, 0.2 mmol) and **1a** (163 mg, 0.2 mmol) in 50 mL of toluene was irradiated for 60 min at 254 nm. The resulting violet solution was then characterized spectroscopically, where [**TippTeP**{**W**(**CO**)<sub>5</sub>}<sub>2</sub>] (**4a-II**) could be identified.

**4a-II**: <sup>31</sup>P{<sup>1</sup>H} NMR (CD<sub>2</sub>Cl<sub>2</sub>, 162 MHz): δ = 839 (s, <sup>1</sup>J<sub>P,W</sub> = 174 Hz).

<sup>1</sup>H NMR spectrum of the reaction solution:

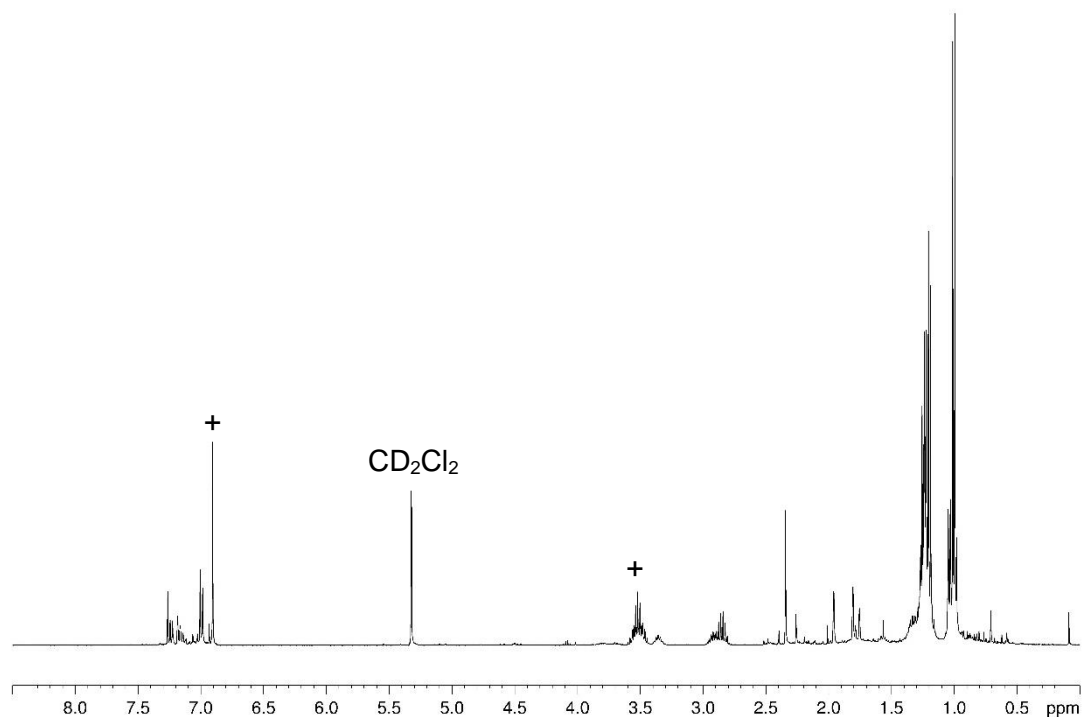

**Figure S19.** <sup>1</sup>H NMR spectrum of the reaction mixture of **1a** + **Tipp<sub>2</sub>Te<sub>2</sub>** in CD<sub>2</sub>Cl<sub>2</sub>. + = **Tipp<sub>2</sub>Te<sub>2</sub>**

<sup>31</sup>P{<sup>1</sup>H} NMR spectrum of the reaction solution:

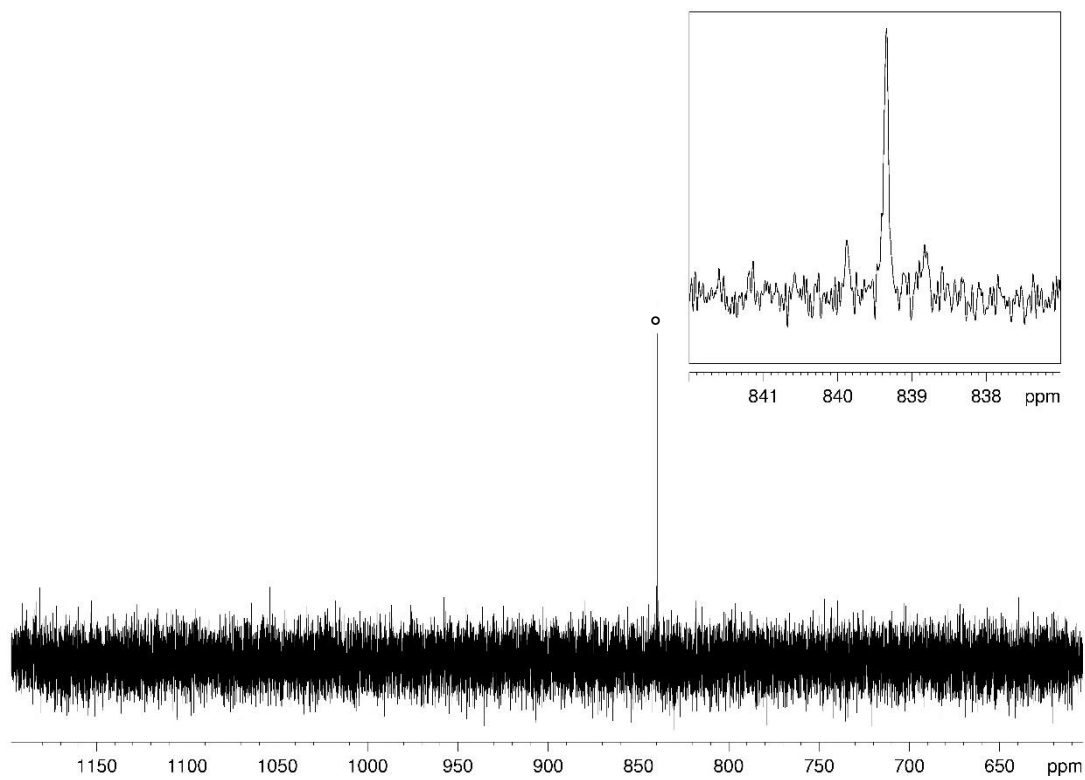

**Figure S20.**  $^{31}\text{P}\{^1\text{H}\}$  NMR spectrum of the reaction mixture of **1a** +  $\text{Tipp}_2\text{Te}_2$  in  $\text{CD}_2\text{Cl}_2$ .  $\delta = 4\mathbf{a-II}$ .

### 3. Crystallographic Data

#### 3.1. General information

Single crystal X-ray structure analyses were either carried out on a Gemini Ultra Diffractometer (Rigaku Oxford Diffraction, formerly Agilent Technologies) or a GV50 diffractometer (Rigaku Oxford Diffraction). The Gemini Ultra diffractometer was equipped with either a molybdenum X-ray radiation source ( $\text{Mo-K}\alpha = 0.71072 \text{ \AA}$ ) or a copper X-ray radiation source ( $\text{Cu-K}\alpha = 1.5406 \text{ \AA}$ ) and an AtlasS2 CCD detector as well as an Oxford Systems CryoJet cooling system. The GV50 diffractometer was equipped with a copper X-ray radiation source and a TitanS2 detector as well as an Oxford Cryosystems CryoStream 700 cooling system.

Figures of the molecular structures were prepared with the program *Olex2*<sup>[5]</sup>.

CIF files with comprehensive information on the details of the diffraction experiments and full tables of bond lengths and angles for **2a**, **2b**, **3a-I**, **3a-II**, **3b**, **5**, **6a**, and **6b** are deposited in Cambridge Crystallographic Data Centre under the deposition codes [CCDC-2083565](#), [CCDC-2083566](#), [CCDC-2083567](#), [CCDC-2083568](#), [CCDC-2083569](#), [CCDC-2083570](#), [CCDC-2083571](#), [CCDC-2083572](#), respectively.

#### 3.1.2. Handling

Due to their air and water sensitivity, the crystals were coated with mineral oil (Sigma Aldrich, CAS 8042-47-5). Suitable single crystals were picked under the microscope from the oil and transferred onto a MiTeGen MicroLoop attached to a goniometer head. The goniometer head was then placed onto the goniometer with the loop sitting in a current of cold nitrogen.

#### 3.1.3. Data processing

After collection of the crystal structure data, integration and data reduction were carried out with the program *CrysAlis Pro*<sup>[6]</sup>.

#### 3.1.4. Structure solution and refinement

Structure elucidation was carried out with the program *SHELXT*<sup>[7]</sup> using direct methods. Refinement occurred with the least squares method with the program *SHELXL*<sup>[8]</sup>. Both were used within *Olex2*<sup>[5]</sup> as the platform.

### 3.2. Crystal Structure Data for compounds 2a, 2b, 3a-I, 3a-II, 3b

|                                                | 2a                                                              | 2b                                                               | 3a-I                                                             | 3a-II                                                                                         | 3b                                                                                             |
|------------------------------------------------|-----------------------------------------------------------------|------------------------------------------------------------------|------------------------------------------------------------------|-----------------------------------------------------------------------------------------------|------------------------------------------------------------------------------------------------|
| Formula                                        | C <sub>16</sub> H <sub>5</sub> O <sub>10</sub> PSW <sub>2</sub> | C <sub>16</sub> H <sub>5</sub> AsO <sub>10</sub> SW <sub>2</sub> | C <sub>16</sub> H <sub>5</sub> O <sub>10</sub> PSeW <sub>2</sub> | C <sub>38</sub> H <sub>22</sub> O <sub>20</sub> P <sub>2</sub> Se <sub>2</sub> W <sub>4</sub> | C <sub>38</sub> H <sub>22</sub> As <sub>2</sub> O <sub>20</sub> Se <sub>2</sub> W <sub>4</sub> |
| <i>D</i> <sub>calc.</sub> / g cm <sup>-3</sup> | 2.486                                                           | 2.632                                                            | 2.637                                                            | 2.436                                                                                         | 2.520                                                                                          |
| <i>m</i> /mm <sup>-1</sup>                     | 22.032                                                          | 23.124                                                           | 23.108                                                           | 20.365                                                                                        | 20.952                                                                                         |
| Formula Weight                                 | 787.93                                                          | 831.88                                                           | 834.83                                                           | 1753.81                                                                                       | 1841.71                                                                                        |
| Colour                                         | green                                                           | violet                                                           | dark red                                                         | metallic dark green                                                                           | metallic dark green                                                                            |
| Shape                                          | block                                                           | needle                                                           | plate                                                            | block                                                                                         | block                                                                                          |
| Size/mm <sup>3</sup>                           | 0.18×0.07×0.06                                                  | 0.21×0.04×0.02                                                   | 0.14×0.11×0.03                                                   | 0.60×0.33×0.28                                                                                | 0.49×0.33×0.19                                                                                 |
| <i>T</i> /K                                    | 123(1)                                                          | 123.00(14)                                                       | 123(2)                                                           | 123.00(14)                                                                                    | 123.2(4)                                                                                       |
| Crystal System                                 | triclinic                                                       | monoclinic                                                       | monoclinic                                                       | triclinic                                                                                     | triclinic                                                                                      |
| Space Group                                    | <i>P</i> -1                                                     | <i>P</i> 2 <sub>1</sub> / <i>c</i>                               | <i>P</i> 2 <sub>1</sub> / <i>c</i>                               | <i>P</i> -1                                                                                   | <i>P</i> -1                                                                                    |
| <i>a</i> /Å                                    | 6.59340(10)                                                     | 6.97820(10)                                                      | 7.01510(10)                                                      | 9.61900(10)                                                                                   | 9.7509(2)                                                                                      |
| <i>b</i> /Å                                    | 17.2561(4)                                                      | 16.3547(2)                                                       | 16.4460(2)                                                       | 15.3701(2)                                                                                    | 15.2808(5)                                                                                     |
| <i>c</i> /Å                                    | 19.7432(4)                                                      | 18.6493(3)                                                       | 18.4907(2)                                                       | 18.5803(3)                                                                                    | 18.6934(7)                                                                                     |
| <i>a</i> /°                                    | 109.413(2)                                                      | 90                                                               | 90                                                               | 66.5430(10)                                                                                   | 66.459(3)                                                                                      |
| <i>b</i> /°                                    | 91.241(2)                                                       | 99.533(2)                                                        | 99.7400(10)                                                      | 78.3160(10)                                                                                   | 78.315(2)                                                                                      |
| <i>g</i> /°                                    | 95.635(2)                                                       | 90                                                               | 90                                                               | 72.3750(10)                                                                                   | 72.751(2)                                                                                      |
| <i>V</i> /Å <sup>3</sup>                       | 2104.83(8)                                                      | 2098.98(5)                                                       | 2102.53(5)                                                       | 2391.12(6)                                                                                    | 2427.41(14)                                                                                    |
| <i>Z</i>                                       | 4                                                               | 4                                                                | 4                                                                | 2                                                                                             | 2                                                                                              |
| <i>Z</i> '                                     | 2                                                               | 1                                                                | 1                                                                | 1                                                                                             | 1                                                                                              |
| Wavelength/Å                                   | 1.54184                                                         | 1.54184                                                          | 1.54184                                                          | 1.54184                                                                                       | 1.54184                                                                                        |
| Radiation type                                 | Cu K <sub>α</sub>                                               | Cu K <sub>α</sub>                                                | Cu K <sub>α</sub>                                                | Cu K <sub>α</sub>                                                                             | Cu K <sub>α</sub>                                                                              |
| <i>Q</i> <sub>min</sub> /°                     | 2.958                                                           | 3.617                                                            | 3.620                                                            | 3.235                                                                                         | 3.250                                                                                          |
| <i>Q</i> <sub>max</sub> /°                     | 73.827                                                          | 66.815                                                           | 72.061                                                           | 66.589                                                                                        | 74.127                                                                                         |
| Measured                                       | 13300                                                           | 16040                                                            | 22306                                                            | 29701                                                                                         | 24588                                                                                          |
| Refl's.                                        |                                                                 |                                                                  |                                                                  |                                                                                               |                                                                                                |
| Indep't Refl's                                 | 7859                                                            | 3697                                                             | 4109                                                             | 8372                                                                                          | 9207                                                                                           |
| Refl's I≥2 <i>s</i> (I)                        | 7270                                                            | 3472                                                             | 3879                                                             | 8226                                                                                          | 8822                                                                                           |
| <i>R</i> <sub>int</sub>                        | 0.0284                                                          | 0.0295                                                           | 0.0454                                                           | 0.0438                                                                                        | 0.0475                                                                                         |
| Parameters                                     | 541                                                             | 271                                                              | 271                                                              | 602                                                                                           | 602                                                                                            |
| Restraints                                     | 0                                                               | 0                                                                | 0                                                                | 0                                                                                             | 0                                                                                              |
| Largest Peak                                   | 0.704                                                           | 0.568                                                            | 2.537                                                            | 1.330                                                                                         | 1.655                                                                                          |
| Deepest Hole                                   | -0.800                                                          | -0.595                                                           | -1.009                                                           | -2.630                                                                                        | -2.108                                                                                         |
| GooF                                           | 1.005                                                           | 1.053                                                            | 1.096                                                            | 1.224                                                                                         | 1.193                                                                                          |
| <i>wR</i> <sub>2</sub> (all data)              | 0.0499                                                          | 0.0360                                                           | 0.0735                                                           | 0.0842                                                                                        | 0.0935                                                                                         |
| <i>wR</i> <sub>2</sub>                         | 0.0486                                                          | 0.0352                                                           | 0.0720                                                           | 0.0837                                                                                        | 0.0924                                                                                         |
| <i>R</i> <sub>I</sub> (all data)               | 0.0245                                                          | 0.0184                                                           | 0.0294                                                           | 0.0323                                                                                        | 0.0384                                                                                         |
| <i>R</i> <sub>I</sub>                          | 0.0220                                                          | 0.0163                                                           | 0.0275                                                           | 0.0316                                                                                        | 0.0366                                                                                         |
| Molecules in asymm. unit                       | 1                                                               | 1                                                                | 1                                                                | 2                                                                                             | 2                                                                                              |

### 3.3. Crystal Structure Data for compounds 5, 6a, 6b

|                                                | <b>5</b>                                                                      | <b>6a</b>                                                                      | <b>6b</b>                                                        |
|------------------------------------------------|-------------------------------------------------------------------------------|--------------------------------------------------------------------------------|------------------------------------------------------------------|
| Formula                                        | C <sub>20</sub> H <sub>10</sub> O <sub>8</sub> Se <sub>2</sub> W <sub>2</sub> | C <sub>28</sub> H <sub>22</sub> O <sub>10</sub> Te <sub>2</sub> W <sub>2</sub> | C <sub>23</sub> H <sub>22</sub> O <sub>5</sub> Te <sub>2</sub> W |
| <i>D</i> <sub>calc.</sub> / g cm <sup>-3</sup> | 2.718                                                                         | 2.342                                                                          | 2.143                                                            |
| <i>μ</i> /mm <sup>-1</sup>                     | 23.147                                                                        | 8.918                                                                          | 26.511                                                           |
| Formula Weight                                 | 903.90                                                                        | 1141.35                                                                        | 817.45                                                           |
| Colour                                         | green                                                                         | clear dark red                                                                 | light violet                                                     |
| Shape                                          | needle                                                                        | block                                                                          | plate                                                            |
| Size/mm <sup>3</sup>                           | 0.13×0.04×0.03                                                                | 0.22×0.17×0.12                                                                 | 0.32×0.21×0.05                                                   |
| <i>T</i> /K                                    | 123.00(14)                                                                    | 123.00(14)                                                                     | 123                                                              |
| Crystal System                                 | monoclinic                                                                    | monoclinic                                                                     | monoclinic                                                       |
| Space Group                                    | <i>C2/c</i>                                                                   | <i>P2<sub>1</sub>/c</i>                                                        | <i>P2<sub>1</sub>/c</i>                                          |
| <i>a</i> /Å                                    | 18.3332(5)                                                                    | 9.9217(2)                                                                      | 16.5396(12)                                                      |
| <i>b</i> /Å                                    | 7.2060(2)                                                                     | 12.1683(2)                                                                     | 18.5800(3)                                                       |
| <i>c</i> /Å                                    | 17.1601(5)                                                                    | 13.7521(2)                                                                     | 28.924(2)                                                        |
| <i>α</i> /°                                    | 90                                                                            | 90                                                                             | 90                                                               |
| <i>β</i> /°                                    | 102.976(4)                                                                    | 102.838(2)                                                                     | 145.249(17)                                                      |
| <i>γ</i> /°                                    | 90                                                                            | 90                                                                             | 90                                                               |
| <i>V</i> /Å <sup>3</sup>                       | 2209.11(11)                                                                   | 1618.79(5)                                                                     | 5066.6(13)                                                       |
| <i>Z</i>                                       | 4                                                                             | 2                                                                              | 8                                                                |
| <i>Z'</i>                                      | 0.5                                                                           | 0.5                                                                            | 2                                                                |
| Wavelength/Å                                   | 1.54184                                                                       | 0.71073                                                                        | 1.54184                                                          |
| Radiation type                                 | Cu K <sub>α</sub>                                                             | Mo K <sub>α</sub>                                                              | Cu K <sub>α</sub>                                                |
| <i>θ</i> <sub>min</sub> /°                     | 4.951                                                                         | 2.850                                                                          | 3.584                                                            |
| <i>θ</i> <sub>max</sub> /°                     | 73.958                                                                        | 29.431                                                                         | 72.941                                                           |
| Measured Refl's.                               | 4009                                                                          | 30810                                                                          | 27607                                                            |
| Indep't Refl's                                 | 2077                                                                          | 4243                                                                           | 9821                                                             |
| Refl's I≥2 <i>σ</i> (I)                        | 1852                                                                          | 4027                                                                           | 9047                                                             |
| <i>R</i> <sub>int</sub>                        | 0.0573                                                                        | 0.0309                                                                         | 0.0351                                                           |
| Parameters                                     | 145                                                                           | 193                                                                            | 571                                                              |
| Restraints                                     | 0                                                                             | 0                                                                              | 0                                                                |
| Largest Peak                                   | 1.626                                                                         | 0.897                                                                          | 1.427                                                            |
| Deepest Hole                                   | -1.469                                                                        | -0.590                                                                         | -1.143                                                           |
| GooF                                           | 1.054                                                                         | 1.071                                                                          | 1.097                                                            |
| <i>wR</i> <sub>2</sub> (all data)              | 0.1019                                                                        | 0.0374                                                                         | 0.0776                                                           |
| <i>wR</i> <sub>2</sub>                         | 0.0978                                                                        | 0.0367                                                                         | 0.0756                                                           |
| <i>R</i> <sub>1</sub> (all data)               | 0.0392                                                                        | 0.0192                                                                         | 0.0337                                                           |
| <i>R</i> <sub>1</sub>                          | 0.0351                                                                        | 0.0175                                                                         | 0.0296                                                           |
| Molecules in<br><i>asymm. unit</i>             | 1                                                                             | 1                                                                              | 2                                                                |

### 3.4. Bonds, angles and figures for the crystal structures

#### 3.4.1. $[PhSP\{W(CO)_5\}_2]$ (**2a**)

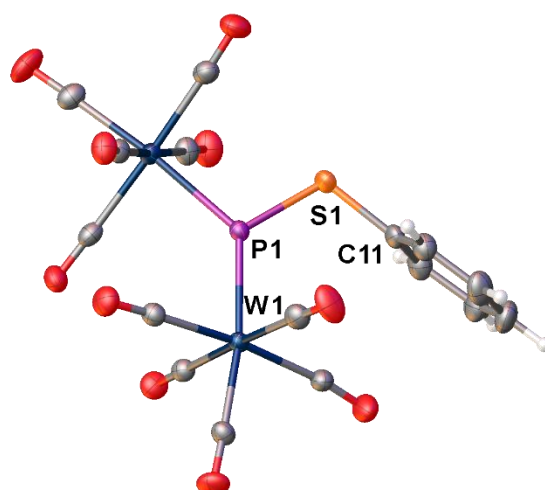

**Figure S21.** Molecular structure of **2a**. Anisotropic displacement parameters are set to 50% probability level. Selected bond lengths [ $\text{\AA}$ ] and angles [ $^\circ$ ]: W1-P1 2.4065(9), W2-P1 2.4239(9), P1-S1 2.0703(13), S1-C11 1.787(4); W1-P1-W2 132.12(4), S1-P1-W2 104.68(4), S1-P1-W1 123.17(5), C11-S1-P1 109.59(13).

#### 3.4.2. $[PhSAs\{W(CO)_5\}_2]$ (**2b**)

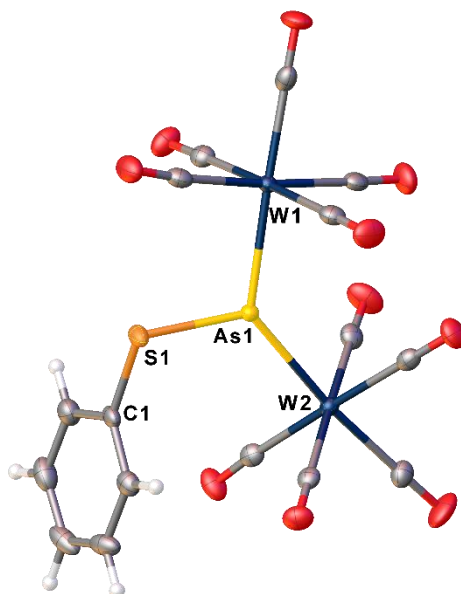

**Figure S22.** Molecular structure of **2b**. Anisotropic displacement parameters are set to 50% probability level. Selected bond lengths [ $\text{\AA}$ ] and angles [ $^\circ$ ]: W1-As1 2.5024(3), W2-As1 2.5043(3), As1-S1 2.1958(8), S1-C1 1.776(3); W1-As1-W2 133.550(14), S1-As1-W1 104.62(2), S1-As1-W2 121.82(2), C1-S1-As1 108.61(10).

### 3.4.3. $[PhSeP\{W(C)O\}_5]_2$ (**3a-I**)

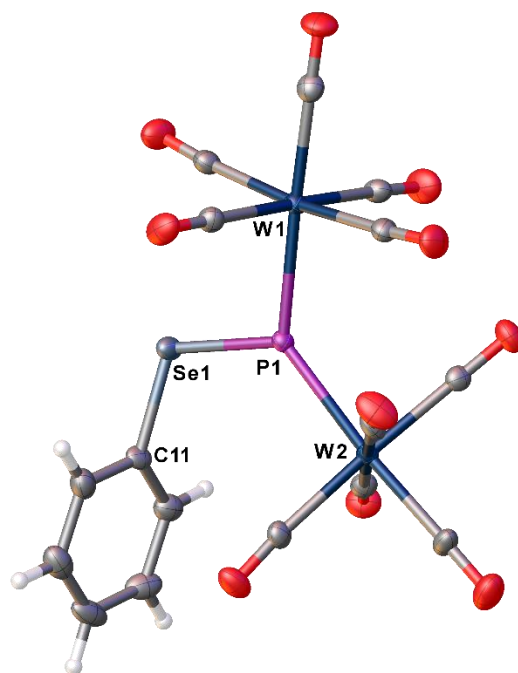

**Figure S23.** Molecular structure of **3a-I**. Anisotropic displacement parameters are set to 50% probability level. Selected bond lengths [ $\text{\AA}$ ] and angles [ $^\circ$ ]: W1-P1 2.4232(11), W2-P1 2.4141(11), Se1-P1 2.2060(13), Se1-C11 1.925(5); W2-P1-W1 132.95(5), Se1-P1-W1 104.19(4), Se1-P1-W2 122.84(5), C11-Se1-P1 107.95(14).

### 3.4.4. $[MesSeP\{W(CO)_5\}_2]$ (**3a-II**)

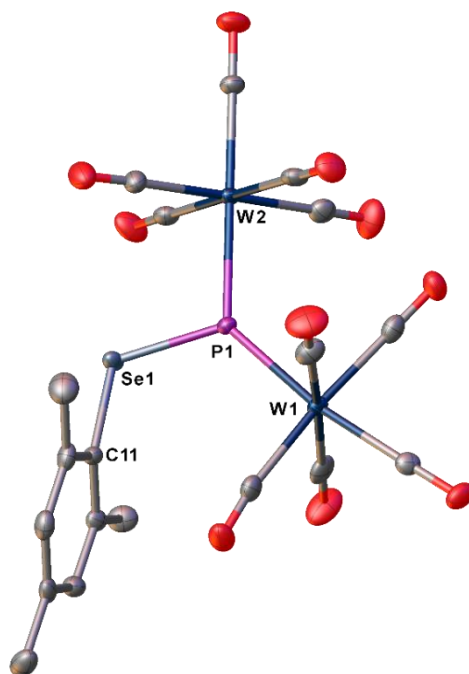

**Figure S24.** Molecular structure of **3a-II**. Anisotropic displacement parameters are set to 50% probability level. H atoms are omitted for clarity. Selected bond lengths [ $\text{\AA}$ ] and angles [ $^\circ$ ]: W1-P1 2.4134(11), W2-P1 2.4360(11), Se1-P1 2.1974(13), Se1-C11 1.924(4); W1-P1-W2 133.23(5), Se1-P1-W2 103.50(5), Se1-P1-W1 123.27(5).



### 3.4.5. [MesSeAs{W(CO)<sub>5</sub>}<sub>2</sub>] (**3b**)

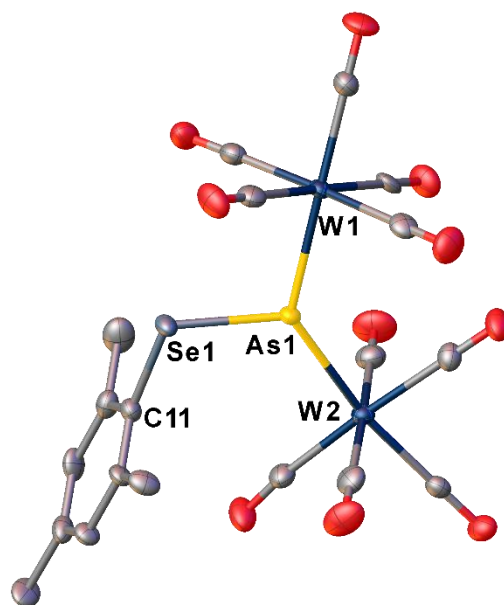

**Figure S25.** Molecular structure of **3b**. Anisotropic displacement parameters are set to 50% probability level. H atoms are omitted for clarity. Selected bond lengths [Å] and angles [°]: W1-As1 2.5192(6), W2-As1 2.5024(6), As1-Se1 2.3193(8), Se1-C11 1.910(6); W2-As1-W1 133.83(3), Se1-As1-W1 103.28(2), Se1-As1-W2 122.86(3), C11-Se1-As1 108.23(16).

### 3.4.7. [PhSe{W(CO)<sub>4</sub>}]<sub>2</sub> (**5**)

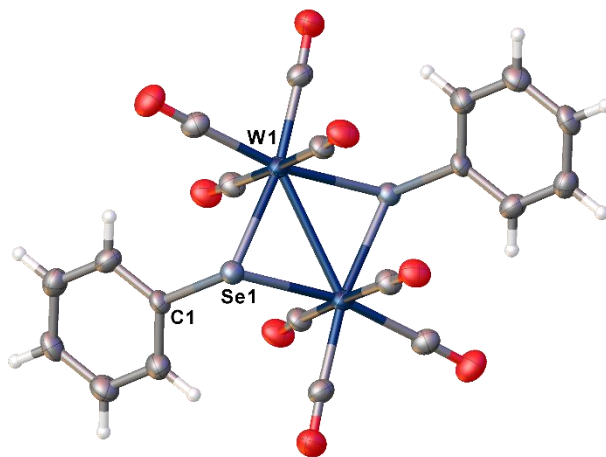

**Figure S26.** Molecular structure of **5**. Anisotropic displacement parameters are set to 50% probability level. Selected bond lengths [Å] and angles [°]: W1-W1<sup>2</sup> 3.0247(6), W1-Se1 2.5891(8), W1-Se1<sup>2</sup> 2.5929(8), Se1-C1 1.953(7); Se1<sup>2</sup>-W1-W1<sup>2</sup> 54.231(19), Se1-W1-W1<sup>2</sup> 54.347(19), Se1-W1-Se1<sup>2</sup> 108.58(2), W1-Se1-W1<sup>2</sup> 74.42(2), C1-Se1-W1<sup>2</sup> 107.8(2), C1-Se1-W1 110.1(2).

---

<sup>2</sup> 1-x, 1-y, 1-z

### 3.4.9. $[Mes(W\{CO\}_5)Te]_2$ (**6a**)

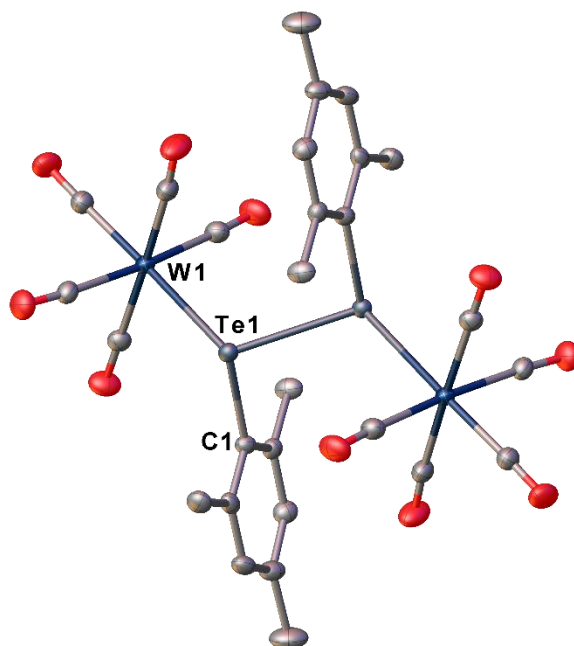

**Figure S27.** Molecular structure of **6a**. Anisotropic displacement parameters are set to 50% probability level. H atoms are omitted for clarity. Selected bond lengths [ $\text{\AA}$ ] and angles [ $^\circ$ ]: W1-Te1 2.79539(17), Te1-Te1<sup>3</sup> 2.8186(3), Te1-C1 2.139(2); W1-Te1-Te1<sup>3</sup> 108.710(8), C1-Te1-W1 112.93(6), C1-Te1-Te1<sup>3</sup> 94.27(7).

### 3.4.10. $[Mes(W\{CO\}_5)TeTeMes]$ (**6b**)

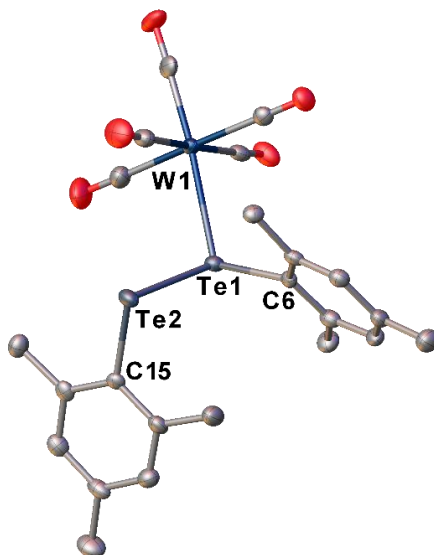

**Figure S28.** Molecular structure of **6b**. Anisotropic displacement parameters are set to 50% probability level. H atoms are omitted for clarity. Selected bond lengths [ $\text{\AA}$ ] and angles [ $^\circ$ ]: W1-Te1 2.8145(5), Te1-Te2 2.7574(11), Te1-C6 2.145(4), Te2-C15 2.126; Te2-Te1-W1 105.09(2), C6-Te1-W1 115.23(11), C6-Te1-Te2 99.57(11), C15-Te2-Te1 95.63(11).

<sup>3</sup> 1-x, 1-y, 1-z

#### 4. Computational details

The geometries of the compounds have been fully optimized with gradient-corrected density functional theory (DFT) in form of Becke's three-parameter hybrid method B3LYP<sup>[9]</sup> with def2-SVPD all electron basis set (ECP on W).<sup>[10]</sup> Gaussian 16 program package<sup>[11]</sup> was used throughout. All structures correspond to minima on their respective potential energy surfaces as verified by computation of second derivatives. Basis sets were obtained from the EMSL basis set exchange database.<sup>[12]</sup>

Gas phase chemical shifts were calculated at PBE0<sup>[13]</sup> level of theory both on experimental and optimized geometries using GIAO approach<sup>[14]</sup>. Chemical shifts of phosphorus nuclei are given relative to the H<sub>3</sub>PO<sub>4</sub> optimized in the gas phase. Values are scaled by the linear equation recommended by *Sinyashin et al.*<sup>[15]</sup>:  $\delta_{\text{scaled}} = (\delta_{\text{unscaled}} - a)/k$ , where values of  $a = 14.4$  and  $k = 1.073$  were obtained at PBE/6-311G(2d,2p) level of theory by fitting known <sup>31</sup>P chemical shifts of 34 organophosphorus compounds.

Standard entropies of the reactions in solution were estimated by taking into account the entropy of the solvation of one gaseous mole in the inert solvent (90 J mol<sup>-1</sup> K<sup>-1</sup>).<sup>[16]</sup>

**Table S1.** Experimental and computed <sup>31</sup>P NMR chemical shifts, on gas phase optimized and on experimental geometries (ppm). All computed chemical shifts are scaled according to [15].

| Compound                    | Exp.  | PBE0/def2-SVPD     |               | PBE0/6-311++G(2d,2p)//            |
|-----------------------------|-------|--------------------|---------------|-----------------------------------|
|                             |       | on optimized geom. | on exp. geom. | PBE0/def2-SVPD on optimized geom. |
| PhSP{W(CO) <sub>5</sub> }   | 822.9 | 866.2              | 809.7         | 927.6                             |
| PhSeP{W(CO) <sub>5</sub> }  | 835.0 | 898.3              | 869.1         | 966.9                             |
| MesSeP{W(CO) <sub>5</sub> } | 854.3 | 911.9              | 873.5         | 991.5                             |
| MesTeP{W(CO) <sub>5</sub> } | 840.4 | 958.8              |               | 1044.9                            |

**Table S2.** Gas phase reaction energies  $\Delta E^{\circ}$ , enthalpies  $\Delta H^{\circ}_{298}$ , Gibbs energies  $\Delta G^{\circ}_{298}$  in kJ mol<sup>-1</sup>, and reaction entropies  $\Delta S^{\circ}_{298}$ , J mol<sup>-1</sup> K<sup>-1</sup>. B3LYP/def2-SVPD (ECP on W) level of theory. Reaction entropies and Gibbs energies in solution were estimated according to [16].

| Reaction                                                                                                                        | $\Delta E^{\circ}$ | $\Delta H^{\circ}_{298}$ | $\Delta S^{\circ}_{298}$ | $\Delta G^{\circ}_{298}$ | $\Delta S^{\circ}_{298}$ |         | $\Delta G^{\circ}_{298}$ |         |
|---------------------------------------------------------------------------------------------------------------------------------|--------------------|--------------------------|--------------------------|--------------------------|--------------------------|---------|--------------------------|---------|
|                                                                                                                                 |                    |                          |                          |                          | solvent                  | solvent | solvent                  | solvent |
| Cp*P{W(CO) <sub>5</sub> } <sub>2</sub> = Cp* + P{W(CO) <sub>5</sub> } <sub>2</sub>                                              | 128.7              | 114.6                    | 293.0                    | 27.3                     | 203.0                    | 54.1    |                          |         |
| (Cp*) <sub>2</sub> = 2 Cp*                                                                                                      | 111.4              | 87.3                     | 300.6                    | -2.3                     | 210.6                    | 24.6    |                          |         |
| Ph <sub>2</sub> S <sub>2</sub> = 2 PhS                                                                                          | 165.0              | 157.6                    | 159.9                    | 109.9                    | 69.9                     | 136.7   |                          |         |
| Ph <sub>2</sub> Se <sub>2</sub> = 2 PhSe                                                                                        | 225.4              | 219.2                    | 159.2                    | 171.7                    | 69.2                     | 198.6   |                          |         |
| Ph <sub>2</sub> Te <sub>2</sub> = 2 PhTe                                                                                        | 164.3              | 158.8                    | 152.9                    | 113.2                    | 62.9                     | 140.1   |                          |         |
| Mes <sub>2</sub> S <sub>2</sub> = 2 MesS                                                                                        | 130.9              | 123.7                    | 156.8                    | 76.9                     | 66.8                     | 103.8   |                          |         |
| Mes <sub>2</sub> Se <sub>2</sub> = 2 MesSe                                                                                      | 189.6              | 182.6                    | 153.9                    | 136.7                    | 63.9                     | 163.5   |                          |         |
| Mes <sub>2</sub> Te <sub>2</sub> = 2 MesTe                                                                                      | 144.9              | 138.8                    | 158.1                    | 91.7                     | 68.1                     | 118.5   |                          |         |
| Cp*P{W(CO) <sub>5</sub> } <sub>2</sub> + ½ Ph <sub>2</sub> S <sub>2</sub> = Cp* + PhSP{W(CO) <sub>5</sub> } <sub>2</sub>        | 1.4                | -8.9                     | 139.9                    | -50.6                    | 94.9                     | -37.2   |                          |         |
| Cp*P{W(CO) <sub>5</sub> } <sub>2</sub> + ½ Ph <sub>2</sub> Se <sub>2</sub> = Cp* + PhSeP{W(CO) <sub>5</sub> } <sub>2</sub>      | 15.2               | 4.6                      | 142.8                    | -38.0                    | 97.8                     | -24.6   |                          |         |
| Cp*P{W(CO) <sub>5</sub> } <sub>2</sub> + ½ Ph <sub>2</sub> Te <sub>2</sub> = Cp* + PhTeP{W(CO) <sub>5</sub> } <sub>2</sub>      | 34.0               | 22.8                     | 148.7                    | -21.5                    | 103.7                    | -8.1    |                          |         |
| Cp*P{W(CO) <sub>5</sub> } <sub>2</sub> + ½ Mes <sub>2</sub> S <sub>2</sub> = Cp* + MesSP{W(CO) <sub>5</sub> } <sub>2</sub>      | -9.9               | -20.0                    | 132.3                    | -59.4                    | 87.3                     | -46.0   |                          |         |
| Cp*P{W(CO) <sub>5</sub> } <sub>2</sub> + ½ Mes <sub>2</sub> Se <sub>2</sub> = Cp* + MesSeP{W(CO) <sub>5</sub> } <sub>2</sub>    | 5.0                | -5.6                     | 152.5                    | -51.0                    | 107.5                    | -37.6   |                          |         |
| Cp*P{W(CO) <sub>5</sub> } <sub>2</sub> + ½ Mes <sub>2</sub> Te <sub>2</sub> = Cp* + MesTeP{W(CO) <sub>5</sub> } <sub>2</sub>    | 24.3               | 13.3                     | 146.0                    | -30.3                    | 101.0                    | -16.9   |                          |         |
| P{W(CO) <sub>5</sub> } <sub>2</sub> + Ph <sub>2</sub> S <sub>2</sub> = PhS + PhSP{W(CO) <sub>5</sub> } <sub>2</sub>             | -44.8              | -44.7                    | -73.1                    | -22.9                    | -73.1                    | -22.9   |                          |         |
| P{W(CO) <sub>5</sub> } <sub>2</sub> + Ph <sub>2</sub> Se <sub>2</sub> = PhSe + PhSeP{W(CO) <sub>5</sub> } <sub>2</sub>          | -0.8               | -0.4                     | -70.6                    | 20.6                     | -70.6                    | 20.6    |                          |         |
| P{W(CO) <sub>5</sub> } <sub>2</sub> + Ph <sub>2</sub> Te <sub>2</sub> = PhTe + PhTeP{W(CO) <sub>5</sub> } <sub>2</sub>          | -12.6              | -12.4                    | -67.8                    | 7.8                      | -67.8                    | 7.8     |                          |         |
| P{W(CO) <sub>5</sub> } <sub>2</sub> + Mes <sub>2</sub> S <sub>2</sub> = MesS + MesSP{W(CO) <sub>5</sub> } <sub>2</sub>          | -73.2              | -72.8                    | -82.3                    | -48.2                    | -82.3                    | -48.2   |                          |         |
| P{W(CO) <sub>5</sub> } <sub>2</sub> + Mes <sub>2</sub> Se <sub>2</sub> = MesSe + MesSeP{W(CO) <sub>5</sub> } <sub>2</sub>       | -28.9              | -28.9                    | -63.5                    | -9.9                     | -63.5                    | -9.9    |                          |         |
| P{W(CO) <sub>5</sub> } <sub>2</sub> + Mes <sub>2</sub> Te <sub>2</sub> = MesTe + MesTeP{W(CO) <sub>5</sub> } <sub>2</sub>       | -32.0              | -31.9                    | -67.9                    | -11.7                    | -67.9                    | -11.7   |                          |         |
| Cp*P{W(CO) <sub>5</sub> } <sub>2</sub> + PhSH = HCp* + PhSP{W(CO) <sub>5</sub> } <sub>2</sub>                                   | -84.5              | -79.4                    | 25.6                     | -87.0                    | 25.6                     | -87.0   |                          |         |
| Cp*P{W(CO) <sub>5</sub> } <sub>2</sub> + PhSeH = HCp* + PhSeP{W(CO) <sub>5</sub> } <sub>2</sub>                                 | -96.2              | -89.7                    | 14.7                     | -94.0                    | 14.7                     | -94.0   |                          |         |
| Cp*P{W(CO) <sub>5</sub> } <sub>2</sub> + PhTeH = HCp* + PhTeP{W(CO) <sub>5</sub> } <sub>2</sub>                                 | -106.3             | -97.7                    | 30.0                     | -106.7                   | 30.0                     | -106.7  |                          |         |
| Cp*P{W(CO) <sub>5</sub> } <sub>2</sub> + MesSH = HCp* + MesSP{W(CO) <sub>5</sub> } <sub>2</sub>                                 | -86.7              | -81.8                    | 22.0                     | -88.4                    | 22.0                     | -88.4   |                          |         |
| Cp*P{W(CO) <sub>5</sub> } <sub>2</sub> + MesSeH = HCp* + MesSeP{W(CO) <sub>5</sub> } <sub>2</sub>                               | -95.3              | -88.9                    | 38.9                     | -100.5                   | 38.9                     | -100.5  |                          |         |
| Cp*P{W(CO) <sub>5</sub> } <sub>2</sub> + MesTeH = HCp* + MesTeP{W(CO) <sub>5</sub> } <sub>2</sub>                               | -104.1             | -95.5                    | 27.5                     | -103.7                   | 27.5                     | -103.7  |                          |         |
| Cp*P{W(CO) <sub>5</sub> } <sub>2</sub> + PhSH = Cp*P{W(CO) <sub>5</sub> } <sub>2</sub> ·PhSH                                    | 37.7               | 44.2                     | -220.0                   | 109.8                    | -130.0                   | 83.0    |                          |         |
| Cp*P{W(CO) <sub>5</sub> } <sub>2</sub> + PhSeH = Cp*P{W(CO) <sub>5</sub> } <sub>2</sub> ·PhSeH                                  | 34.9               | 40.5                     | -227.0                   | 108.2                    | -137.0                   | 81.4    |                          |         |
| Cp*P{W(CO) <sub>5</sub> } <sub>2</sub> + PhTeH = Cp*P{W(CO) <sub>5</sub> } <sub>2</sub> ·PhTeH                                  | 33.2               | 38.8                     | -212.4                   | 102.1                    | -122.4                   | 75.3    |                          |         |
| Cp*P{W(CO) <sub>5</sub> } <sub>2</sub> + PhS = Cp*P{W(CO) <sub>5</sub> } <sub>2</sub> ·PhS                                      | -55.7              | -48.7                    | -194.4                   | 9.3                      | -104.4                   | -17.5   |                          |         |
| Cp*P{W(CO) <sub>5</sub> } <sub>2</sub> + PhSe = Cp*P{W(CO) <sub>5</sub> } <sub>2</sub> ·PhSe                                    | -76.7              | -70.4                    | -197.6                   | -11.5                    | -107.6                   | -38.3   |                          |         |
| Cp*P{W(CO) <sub>5</sub> } <sub>2</sub> + PhTe = Cp*P{W(CO) <sub>5</sub> } <sub>2</sub> ·PhTe                                    | -35.7              | -30.2                    | -199.3                   | 29.2                     | -109.3                   | 2.4     |                          |         |
| Cp*P{W(CO) <sub>5</sub> } <sub>2</sub> ·PhSH = Cp*H + PhSP{W(CO) <sub>5</sub> } <sub>2</sub>                                    | -122.2             | -123.6                   | 245.5                    | -196.8                   | 155.5                    | -170.0  |                          |         |
| Cp*P{W(CO) <sub>5</sub> } <sub>2</sub> ·PhSeH = Cp*H + PhSeP{W(CO) <sub>5</sub> } <sub>2</sub>                                  | -131.1             | -130.2                   | 241.7                    | -202.2                   | 151.7                    | -175.4  |                          |         |
| Cp*P{W(CO) <sub>5</sub> } <sub>2</sub> ·PhTeH = Cp*H + PhTeP{W(CO) <sub>5</sub> } <sub>2</sub>                                  | -139.5             | -136.5                   | 242.3                    | -208.8                   | 152.3                    | -181.9  |                          |         |
| Cp*P{W(CO) <sub>5</sub> } <sub>2</sub> ·PhS = Cp* + PhSP{W(CO) <sub>5</sub> } <sub>2</sub>                                      | -25.4              | -39.0                    | 254.4                    | -114.8                   | 164.4                    | -88.0   |                          |         |
| Cp*P{W(CO) <sub>5</sub> } <sub>2</sub> ·PhSe = Cp* + PhSeP{W(CO) <sub>5</sub> } <sub>2</sub>                                    | -20.8              | -34.6                    | 260.7                    | -112.4                   | 170.7                    | -85.5   |                          |         |
| Cp*P{W(CO) <sub>5</sub> } <sub>2</sub> ·PhTe = Cp* + PhTeP{W(CO) <sub>5</sub> } <sub>2</sub>                                    | -12.4              | -26.4                    | 271.5                    | -107.4                   | 181.5                    | -80.5   |                          |         |
| Cp*P{W(CO) <sub>5</sub> } <sub>2</sub> + Ph <sub>2</sub> S <sub>2</sub> = Cp* + PhS + PhSP{W(CO) <sub>5</sub> } <sub>2</sub>    | 83.9               | 69.9                     | 219.9                    | 4.4                      | 129.9                    | 31.2    |                          |         |
| Cp*P{W(CO) <sub>5</sub> } <sub>2</sub> + Ph <sub>2</sub> Se <sub>2</sub> = Cp* + PhSe + PhSeP{W(CO) <sub>5</sub> } <sub>2</sub> | 127.9              | 114.2                    | 222.4                    | 47.9                     | 132.4                    | 74.7    |                          |         |
| Cp*P{W(CO) <sub>5</sub> } <sub>2</sub> + Ph <sub>2</sub> Te <sub>2</sub> = Cp* + PhTe + PhTeP{W(CO) <sub>5</sub> } <sub>2</sub> | 116.1              | 102.2                    | 225.2                    | 35.1                     | 135.2                    | 61.9    |                          |         |

**Table S3.** Total energies  $E^{\circ}_0$ , sum of electronic and thermal enthalpies  $H^{\circ}_{298}$  (Hartree) and standard entropies  $S^{\circ}_{298}$  (cal mol<sup>-1</sup>K<sup>-1</sup>) for studied compounds. B3LYP/def2-SVPD (ECP on W) level of theory.

| Compound                                      | $E^{\circ}_0$ | $H^{\circ}_{298}$ | $S^{\circ}_{298}$ |
|-----------------------------------------------|---------------|-------------------|-------------------|
| Cp*P{W(CO) <sub>5</sub> } <sub>2</sub>        | -1998.074106  | -1997.726543      | 255.279           |
| P{W(CO) <sub>5</sub> } <sub>2</sub>           | -1608.222862  | -1608.110192      | 211.186           |
| Cp*                                           | -389.8022192  | -389.572698       | 114.119           |
| HCp*                                          | -390.4336937  | -390.190214       | 107.606           |
| (Cp*) <sub>2</sub>                            | -779.646884   | -779.178663       | 156.397           |
| Ph <sub>2</sub> S <sub>2</sub>                | -1259.167212  | -1258.970067      | 116.934           |
| Ph <sub>2</sub> Se <sub>2</sub>               | -5265.593876  | -5265.397772      | 123.375           |
| Ph <sub>2</sub> Te <sub>2</sub>               | -999.2120126  | -999.016188       | 128.912           |
| PhS                                           | -629.5521767  | -629.455028       | 77.571            |
| PhSe                                          | -2632.754012  | -2632.657141      | 80.716            |
| PhTe                                          | -499.5747193  | -499.477846       | 82.729            |
| PhSH                                          | -630.1823598  | -630.075681       | 79.286            |
| PhSeH                                         | -2633.385984  | -2633.28051       | 85.794            |
| PhTeH                                         | -500.1840423  | -500.079707       | 86.315            |
| PhSP{W(CO) <sub>5</sub> } <sub>2</sub>        | -2237.854952  | -2237.642255      | 233.07            |
| PhSeP{W(CO) <sub>5</sub> } <sub>2</sub>       | -4241.063034  | -4240.85099       | 236.973           |
| PhTeP{W(CO) <sub>5</sub> } <sub>2</sub>       | -2107.864944  | -2107.653253      | 241.156           |
| Mes <sub>2</sub> S <sub>2</sub>               | -1494.906249  | -1494.535302      | 165.612           |
| Mes <sub>2</sub> Se <sub>2</sub>              | -5501.330759  | -5500.960724      | 172.102           |
| Mes <sub>2</sub> Te <sub>2</sub>              | -1234.945736  | -1234.576189      | 175.936           |
| MesS                                          | -747.4281989  | -747.244098       | 101.543           |
| MesSe                                         | -2750.629273  | -2750.445586      | 104.447           |
| MesTe                                         | -617.4452823  | -617.261661       | 106.867           |
| MesSH                                         | -748.0553572  | -747.861612       | 102.642           |
| MesSeH                                        | -2751.258643  | -2751.066128      | 106.682           |
| MesTeH                                        | -618.0554551  | -617.864192       | 109.791           |
| MesSP{W(CO) <sub>5</sub> } <sub>2</sub>       | -2355.728791  | -2355.429107      | 255.58            |
| MesSeP{W(CO) <sub>5</sub> } <sub>2</sub>      | -4358.935359  | -4358.636331      | 263.659           |
| MesTeP{W(CO) <sub>5</sub> } <sub>2</sub>      | -2225.735511  | -2225.436889      | 264.029           |
| Cp*P{W(CO) <sub>5</sub> } <sub>2</sub> ·SHPh  | -2628.242112  | -2627.785385      | 281.995           |
| Cp*P{W(CO) <sub>5</sub> } <sub>2</sub> ·SeHPh | -4631.446804  | -4630.991622      | 286.816           |
| Cp*P{W(CO) <sub>5</sub> } <sub>2</sub> ·TeHPh | -2498.245498  | -2497.791476      | 290.839           |
| Cp*P{W(CO) <sub>5</sub> } <sub>2</sub> ·SPh   | -2627.647488  | -2627.200101      | 286.392           |
| Cp*P{W(CO) <sub>5</sub> } <sub>2</sub> ·SePh  | -4630.857325  | -4630.410494      | 288.774           |
| Cp*P{W(CO) <sub>5</sub> } <sub>2</sub> ·TePh  | -2497.662422  | -2497.215882      | 290.386           |

**Table S4.** Optimized xyz coordinates (in Angstroms) for studied compounds. B3LYP/def2-SVPD (ECP on W) level of theory.

|                                            |              |              |              |
|--------------------------------------------|--------------|--------------|--------------|
| <b>Cp*P{W(CO)<sub>5</sub>}<sub>2</sub></b> |              |              |              |
| 6                                          | -0.684066000 | 3.352063000  | 0.405450000  |
| 6                                          | 0.455018000  | 2.350011000  | 0.173394000  |
| 6                                          | 1.205780000  | 2.632434000  | -1.115337000 |
| 6                                          | 2.494840000  | 2.955701000  | -0.797879000 |
| 6                                          | 2.681578000  | 2.870798000  | 0.658657000  |
| 6                                          | 1.509752000  | 2.493206000  | 1.245988000  |
| 15                                         | -0.070974000 | 0.500883000  | 0.081462000  |
| 6                                          | 0.550896000  | 2.655382000  | -2.464336000 |
| 6                                          | 3.585967000  | 3.394954000  | -1.725439000 |
| 6                                          | 3.969872000  | 3.222748000  | 1.337205000  |
| 6                                          | 1.204918000  | 2.376195000  | 2.711046000  |
| 74                                         | -2.544971000 | 0.032645000  | 0.007398000  |
| 74                                         | 1.741468000  | -1.265582000 | -0.013645000 |
| 6                                          | 3.066616000  | -2.834546000 | -0.087398000 |
| 6                                          | 0.335759000  | -2.767304000 | 0.232249000  |
| 6                                          | 3.424322000  | -0.076212000 | -0.291847000 |
| 6                                          | 2.025151000  | -1.116145000 | 2.050011000  |
| 6                                          | 1.511031000  | -1.343155000 | -2.090133000 |
| 6                                          | -4.528145000 | -0.534170000 | -0.105257000 |
| 6                                          | -2.295059000 | -1.319178000 | 1.582690000  |
| 6                                          | -2.904988000 | 1.415951000  | -1.502734000 |
| 6                                          | -2.156655000 | -1.436581000 | -1.419931000 |
| 6                                          | -3.122014000 | 1.461029000  | 1.405651000  |
| 8                                          | -1.997799000 | -2.240242000 | -2.221657000 |
| 8                                          | -3.519321000 | 2.214129000  | 2.176212000  |
| 8                                          | -2.195130000 | -2.033321000 | 2.472675000  |
| 8                                          | -5.628361000 | -0.857756000 | -0.173134000 |
| 8                                          | -3.145537000 | 2.177432000  | -2.328015000 |
| 8                                          | 1.405672000  | -1.373897000 | -3.231366000 |
| 8                                          | 2.203637000  | -1.031328000 | 3.179758000  |
| 8                                          | -0.344045000 | -3.685179000 | 0.357139000  |
| 8                                          | 4.460328000  | 0.395027000  | -0.458966000 |
| 8                                          | 3.801853000  | -3.717996000 | -0.127909000 |
| 1                                          | -1.464532000 | 3.281238000  | -0.357511000 |
| 1                                          | -0.265869000 | 4.367993000  | 0.368317000  |
| 1                                          | -1.147447000 | 3.216567000  | 1.387721000  |
| 1                                          | 0.815916000  | 3.325743000  | 3.115616000  |
| 1                                          | 2.097417000  | 2.119169000  | 3.293952000  |
| 1                                          | 0.446925000  | 1.609427000  | 2.918918000  |
| 1                                          | 4.229633000  | 4.279101000  | 1.162822000  |
| 1                                          | 4.804523000  | 2.623719000  | 0.943617000  |
| 1                                          | 3.920631000  | 3.068056000  | 2.420894000  |
| 1                                          | 3.261097000  | 3.412905000  | -2.771328000 |
| 1                                          | 4.456462000  | 2.725775000  | -1.654253000 |
| 1                                          | 3.941720000  | 4.403917000  | -1.463497000 |
| 1                                          | 0.257277000  | 1.653562000  | -2.812952000 |
| 1                                          | 1.219998000  | 3.075312000  | -3.223942000 |
| 1                                          | -0.363775000 | 3.267594000  | -2.458204000 |
| <b>P{W(CO)<sub>5</sub>}<sub>2</sub></b>    |              |              |              |
| 15                                         | -0.000291000 | 0.440461000  | 0.001411000  |
| 74                                         | -2.375095000 | 0.028871000  | 0.000826000  |
| 74                                         | 2.375440000  | 0.032232000  | -0.000617000 |
| 6                                          | 4.418928000  | -0.382960000 | -0.002740000 |

|   |              |              |              |
|---|--------------|--------------|--------------|
| 6 | 1.951982000  | -2.001753000 | 0.197169000  |
| 6 | 2.744614000  | 2.081994000  | -0.196856000 |
| 6 | 2.467487000  | 0.227637000  | 2.084027000  |
| 6 | 2.384524000  | -0.170695000 | -2.086176000 |
| 6 | -4.418157000 | -0.389951000 | -0.000240000 |
| 6 | -2.133963000 | -1.290198000 | 1.606384000  |
| 6 | -2.655038000 | 1.350622000  | -1.599687000 |
| 6 | -2.065288000 | -1.558196000 | -1.323738000 |
| 6 | -2.693794000 | 1.623085000  | 1.320113000  |
| 8 | -1.892230000 | -2.430618000 | -2.044964000 |
| 8 | -2.878196000 | 2.499341000  | 2.033692000  |
| 8 | -2.001785000 | -2.017025000 | 2.481061000  |
| 8 | -5.537516000 | -0.643481000 | -0.000911000 |
| 8 | -2.820051000 | 2.078899000  | -2.467495000 |
| 8 | 2.398496000  | -0.283784000 | -3.224987000 |
| 8 | 2.529025000  | 0.335434000  | 3.221772000  |
| 8 | 1.709403000  | -3.116021000 | 0.304961000  |
| 8 | 2.950452000  | 3.203592000  | -0.302407000 |
| 8 | 5.538786000  | -0.634591000 | -0.003986000 |

---

**Cp\***

|   |              |              |              |
|---|--------------|--------------|--------------|
| 6 | -1.534586000 | -2.230810000 | 0.004225000  |
| 6 | -0.641235000 | -1.031938000 | 0.001323000  |
| 6 | 0.733231000  | -0.983291000 | -0.001020000 |
| 6 | 1.113315000  | 0.422084000  | -0.006617000 |
| 6 | -0.070567000 | 1.233629000  | -0.005963000 |
| 6 | -1.153633000 | 0.366660000  | -0.000709000 |
| 6 | 1.715034000  | -2.116985000 | -0.007538000 |
| 6 | 2.521708000  | 0.913690000  | 0.010339000  |
| 6 | -0.082186000 | 2.735618000  | -0.005754000 |
| 6 | -2.609473000 | 0.700005000  | 0.003494000  |
| 1 | 3.007883000  | 0.688489000  | 0.976385000  |
| 1 | 2.586039000  | 1.996857000  | -0.148504000 |
| 1 | 3.131210000  | 0.414022000  | -0.760112000 |
| 1 | 2.417823000  | -2.054420000 | 0.839967000  |
| 1 | 2.329373000  | -2.123382000 | -0.923943000 |
| 1 | 1.213030000  | -3.090226000 | 0.055339000  |
| 1 | -2.195395000 | -2.241133000 | 0.887637000  |
| 1 | -0.964956000 | -3.167721000 | 0.003264000  |
| 1 | -2.198143000 | -2.242727000 | -0.877149000 |
| 1 | -3.121484000 | 0.273851000  | -0.876119000 |
| 1 | -2.787596000 | 1.781661000  | 0.003073000  |
| 1 | -3.115679000 | 0.275937000  | 0.887437000  |
| 1 | 0.446788000  | 3.152568000  | -0.878580000 |
| 1 | 0.406530000  | 3.152913000  | 0.890307000  |
| 1 | -1.105072000 | 3.131339000  | -0.029681000 |

---

**HCp\***

|   |              |              |              |
|---|--------------|--------------|--------------|
| 6 | -2.177334000 | -0.168840000 | 1.547676000  |
| 6 | -0.923028000 | 0.001191000  | 0.742513000  |
| 6 | 0.344451000  | 0.181032000  | 1.192198000  |
| 6 | 1.273091000  | 0.313096000  | 0.000000000  |
| 6 | 0.344451000  | 0.181032000  | -1.192198000 |
| 6 | -0.923028000 | 0.001191000  | -0.742513000 |
| 6 | 0.841861000  | 0.264817000  | 2.601407000  |
| 1 | 1.701531000  | 1.335008000  | 0.000000000  |
| 6 | 2.438872000  | -0.691345000 | 0.000000000  |
| 6 | 0.841861000  | 0.264817000  | -2.601407000 |
| 6 | -2.177334000 | -0.168840000 | -1.547676000 |

---

|   |              |              |              |
|---|--------------|--------------|--------------|
| 1 | 1.377636000  | 1.211700000  | 2.783623000  |
| 1 | 1.554775000  | -0.544834000 | 2.832533000  |
| 1 | 0.025770000  | 0.200756000  | 3.331617000  |
| 1 | -2.912900000 | 0.618375000  | 1.315248000  |
| 1 | -1.983169000 | -0.135925000 | 2.626031000  |
| 1 | -2.668275000 | -1.130241000 | 1.325314000  |
| 1 | -2.912900000 | 0.618375000  | -1.315248000 |
| 1 | -2.668275000 | -1.130241000 | -1.325314000 |
| 1 | -1.983169000 | -0.135925000 | -2.626031000 |
| 1 | 1.377636000  | 1.211700000  | -2.783623000 |
| 1 | 0.025770000  | 0.200756000  | -3.331617000 |
| 1 | 1.554775000  | -0.544834000 | -2.832533000 |
| 1 | 3.075102000  | -0.560540000 | 0.886175000  |
| 1 | 3.075102000  | -0.560540000 | -0.886175000 |
| 1 | 2.057408000  | -1.722478000 | 0.000000000  |

---

(Cp\*)<sub>2</sub>

|   |              |              |              |
|---|--------------|--------------|--------------|
| 6 | 1.356004000  | -2.356278000 | 1.978081000  |
| 6 | 0.458520000  | -1.959929000 | 0.839164000  |
| 6 | -1.197375000 | -0.881196000 | -0.503635000 |
| 6 | -0.859820000 | -2.069481000 | -1.064910000 |
| 6 | 0.150225000  | -2.741141000 | -0.225972000 |
| 6 | -1.399645000 | -0.807460000 | 1.984816000  |
| 6 | -2.233831000 | 0.079542000  | -0.998517000 |
| 6 | -1.399645000 | -2.688347000 | -2.321151000 |
| 6 | 0.687709000  | -4.103514000 | -0.552470000 |
| 1 | -1.783839000 | 0.985943000  | -1.426268000 |
| 1 | -2.897817000 | 0.414819000  | -0.187456000 |
| 1 | -2.864728000 | -0.379911000 | -1.769238000 |
| 1 | -2.213833000 | -0.081301000 | 1.915756000  |
| 1 | -0.903643000 | -0.666046000 | 2.953609000  |
| 1 | -1.843873000 | -1.810799000 | 1.980039000  |
| 1 | 1.376622000  | -3.446794000 | 2.101693000  |
| 1 | 1.023441000  | -1.927181000 | 2.932467000  |
| 1 | 2.400456000  | -2.035875000 | 1.835499000  |
| 1 | 1.384053000  | -4.470233000 | 0.210056000  |
| 1 | 1.226022000  | -4.097848000 | -1.514077000 |
| 1 | -0.123211000 | -4.842001000 | -0.654732000 |
| 1 | -2.163754000 | -2.063640000 | -2.796732000 |
| 1 | -1.847447000 | -3.675409000 | -2.123111000 |
| 1 | -0.599319000 | -2.851821000 | -3.060753000 |
| 6 | -0.407291000 | -0.688546000 | 0.798469000  |
| 6 | 0.407291000  | 0.688546000  | 0.798469000  |
| 6 | 1.197375000  | 0.881196000  | -0.503635000 |
| 6 | 0.859820000  | 2.069481000  | -1.064910000 |
| 6 | -0.150225000 | 2.741141000  | -0.225972000 |
| 6 | -0.458520000 | 1.959929000  | 0.839164000  |
| 6 | 1.399645000  | 0.807460000  | 1.984816000  |
| 6 | 2.233831000  | -0.079542000 | -0.998517000 |
| 6 | 1.399645000  | 2.688347000  | -2.321151000 |
| 6 | -0.687709000 | 4.103514000  | -0.552470000 |
| 6 | -1.356004000 | 2.356278000  | 1.978081000  |
| 1 | 2.213833000  | 0.081301000  | 1.915756000  |
| 1 | 0.903643000  | 0.666046000  | 2.953609000  |
| 1 | 1.843873000  | 1.810799000  | 1.980039000  |
| 1 | -1.023441000 | 1.927181000  | 2.932467000  |
| 1 | -2.400456000 | 2.035875000  | 1.835499000  |
| 1 | -1.376622000 | 3.446794000  | 2.101693000  |

---



|   |              |              |              |
|---|--------------|--------------|--------------|
| 1 | -1.226022000 | 4.097848000  | -1.514077000 |
| 1 | 0.123211000  | 4.842001000  | -0.654732000 |
| 1 | -1.384053000 | 4.470233000  | 0.210056000  |
| 1 | 0.599319000  | 2.851821000  | -3.060753000 |
| 1 | 2.163754000  | 2.063640000  | -2.796732000 |
| 1 | 1.847447000  | 3.675409000  | -2.123111000 |
| 1 | 2.864728000  | 0.379911000  | -1.769238000 |
| 1 | 1.783839000  | -0.985943000 | -1.426268000 |
| 1 | 2.897817000  | -0.414819000 | -0.187456000 |

---

**Ph<sub>2</sub>S<sub>2</sub>**

|    |              |              |              |
|----|--------------|--------------|--------------|
| 16 | -0.806978000 | 0.686853000  | -1.723953000 |
| 16 | 0.806978000  | -0.686853000 | -1.723953000 |
| 6  | -0.393188000 | 1.825574000  | -0.399160000 |
| 6  | -1.038835000 | 1.705072000  | 0.840537000  |
| 1  | -1.755478000 | 0.898761000  | 0.996491000  |
| 6  | 0.528612000  | 2.863220000  | -0.608959000 |
| 1  | 1.021589000  | 2.956567000  | -1.576940000 |
| 6  | 0.806978000  | 3.765405000  | 0.419008000  |
| 1  | 1.523936000  | 4.571122000  | 0.251939000  |
| 6  | -0.759567000 | 2.615740000  | 1.864036000  |
| 1  | -1.264769000 | 2.518779000  | 2.826521000  |
| 6  | 0.163457000  | 3.644157000  | 1.656103000  |
| 1  | 0.380116000  | 4.354074000  | 2.455849000  |
| 6  | 0.393188000  | -1.825574000 | -0.399160000 |
| 6  | -0.528612000 | -2.863220000 | -0.608959000 |
| 6  | 1.038835000  | -1.705072000 | 0.840537000  |
| 6  | -0.806978000 | -3.765405000 | 0.419008000  |
| 6  | 0.759567000  | -2.615740000 | 1.864036000  |
| 6  | -0.163457000 | -3.644157000 | 1.656103000  |
| 1  | -1.021589000 | -2.956567000 | -1.576940000 |
| 1  | 1.755478000  | -0.898761000 | 0.996491000  |
| 1  | -1.523936000 | -4.571122000 | 0.251939000  |
| 1  | 1.264769000  | -2.518779000 | 2.826521000  |
| 1  | -0.380116000 | -4.354074000 | 2.455849000  |

---

**Ph<sub>2</sub>Se<sub>2</sub>**

|    |              |              |              |
|----|--------------|--------------|--------------|
| 34 | -0.727755000 | 0.942261000  | -1.365313000 |
| 34 | 0.727755000  | -0.942261000 | -1.365313000 |
| 6  | 0.021788000  | 2.019635000  | 0.060967000  |
| 6  | -0.531160000 | 1.948897000  | 1.348248000  |
| 1  | -1.355819000 | 1.264344000  | 1.547340000  |
| 6  | 1.081632000  | 2.901828000  | -0.197091000 |
| 1  | 1.508393000  | 2.958054000  | -1.198821000 |
| 6  | 1.586842000  | 3.702931000  | 0.829903000  |
| 1  | 2.411226000  | 4.388177000  | 0.624633000  |
| 6  | -0.021788000 | 2.755258000  | 2.370937000  |
| 1  | -0.455457000 | 2.697393000  | 3.370864000  |
| 6  | 1.036965000  | 3.630952000  | 2.114205000  |
| 1  | 1.432575000  | 4.259548000  | 2.913621000  |
| 6  | -0.021788000 | -2.019635000 | 0.060967000  |
| 6  | -1.081632000 | -2.901828000 | -0.197091000 |
| 6  | 0.531160000  | -1.948897000 | 1.348248000  |
| 6  | -1.586842000 | -3.702931000 | 0.829903000  |
| 6  | 0.021788000  | -2.755258000 | 2.370937000  |
| 6  | -1.036965000 | -3.630952000 | 2.114205000  |
| 1  | -1.508393000 | -2.958054000 | -1.198821000 |
| 1  | 1.355819000  | -1.264344000 | 1.547340000  |
| 1  | -2.411226000 | -4.388177000 | 0.624633000  |

---

|   |              |              |             |
|---|--------------|--------------|-------------|
| 1 | 0.455457000  | -2.697393000 | 3.370864000 |
| 1 | -1.432575000 | -4.259548000 | 2.913621000 |

---

**Ph<sub>2</sub>Te<sub>2</sub>**

|    |              |              |              |
|----|--------------|--------------|--------------|
| 52 | -0.978743000 | 0.973672000  | -1.168712000 |
| 52 | 0.978743000  | -0.973672000 | -1.168712000 |
| 6  | -0.250169000 | 2.247027000  | 0.410156000  |
| 6  | -0.697644000 | 2.054598000  | 1.726042000  |
| 1  | -1.392631000 | 1.246247000  | 1.955902000  |
| 6  | 0.642403000  | 3.291410000  | 0.126115000  |
| 1  | 0.993964000  | 3.449662000  | -0.894053000 |
| 6  | 1.086070000  | 4.131496000  | 1.152140000  |
| 1  | 1.780934000  | 4.941726000  | 0.923677000  |
| 6  | -0.250169000 | 2.898426000  | 2.748045000  |
| 1  | -0.602514000 | 2.742618000  | 3.769373000  |
| 6  | 0.641956000  | 3.936223000  | 2.463481000  |
| 1  | 0.989477000  | 4.593523000  | 3.262259000  |
| 6  | 0.250169000  | -2.247027000 | 0.410156000  |
| 6  | -0.642403000 | -3.291410000 | 0.126115000  |
| 6  | 0.697644000  | -2.054598000 | 1.726042000  |
| 6  | -1.086070000 | -4.131496000 | 1.152140000  |
| 6  | 0.250169000  | -2.898426000 | 2.748045000  |
| 6  | -0.641956000 | -3.936223000 | 2.463481000  |
| 1  | -0.993964000 | -3.449662000 | -0.894053000 |
| 1  | 1.392631000  | -1.246247000 | 1.955902000  |
| 1  | -1.780934000 | -4.941726000 | 0.923677000  |
| 1  | 0.602514000  | -2.742618000 | 3.769373000  |
| 1  | -0.989477000 | -4.593523000 | 3.262259000  |

---

**PhS**

|    |              |              |              |
|----|--------------|--------------|--------------|
| 16 | 2.308057000  | 0.000003000  | -0.000053000 |
| 6  | 0.578722000  | -0.000098000 | -0.000099000 |
| 6  | -0.149486000 | 1.221261000  | 0.000102000  |
| 6  | -0.149630000 | -1.221353000 | 0.000013000  |
| 6  | -1.539695000 | 1.216046000  | 0.000143000  |
| 6  | -1.539811000 | -1.215966000 | 0.000247000  |
| 6  | -2.239235000 | 0.000082000  | -0.000423000 |
| 1  | 0.405338000  | 2.159542000  | 0.000374000  |
| 1  | 0.405076000  | -2.159710000 | 0.000273000  |
| 1  | -2.086928000 | 2.160103000  | 0.000390000  |
| 1  | -2.087104000 | -2.159990000 | 0.000439000  |
| 1  | -3.330492000 | 0.000174000  | -0.000536000 |

---

**PhSe**

|    |              |              |              |
|----|--------------|--------------|--------------|
| 34 | 1.849360000  | 0.000008000  | 0.000066000  |
| 6  | -0.068859000 | 0.000512000  | -0.000273000 |
| 6  | -0.774297000 | 1.214463000  | -0.000016000 |
| 6  | -0.773596000 | -1.214001000 | 0.000022000  |
| 6  | -2.171587000 | 1.206494000  | -0.000236000 |
| 6  | -2.170825000 | -1.206963000 | -0.000279000 |
| 6  | -2.876372000 | -0.000418000 | 0.000601000  |
| 1  | -0.240012000 | 2.165810000  | -0.000546000 |
| 1  | -0.238799000 | -2.165068000 | -0.000513000 |
| 1  | -2.710266000 | 2.155879000  | -0.000492000 |
| 1  | -2.708874000 | -2.156705000 | -0.000512000 |
| 1  | -3.967063000 | -0.000692000 | 0.000894000  |

---

**PhTe**

|    |             |              |             |
|----|-------------|--------------|-------------|
| 52 | 0.000000000 | 1.582989000  | 0.000000000 |
| 6  | 0.000687000 | -0.536708000 | 0.000000000 |

---

|   |              |              |              |
|---|--------------|--------------|--------------|
| 6 | 0.000085000  | -1.251056000 | -1.215626000 |
| 6 | 0.000085000  | -1.251056000 | 1.215626000  |
| 6 | -0.000253000 | -2.646780000 | -1.211577000 |
| 6 | -0.000253000 | -2.646780000 | 1.211577000  |
| 6 | -0.000147000 | -3.347331000 | 0.000000000  |
| 1 | 0.000233000  | -0.709185000 | -2.161777000 |
| 1 | 0.000233000  | -0.709185000 | 2.161777000  |
| 1 | -0.000515000 | -3.190132000 | -2.158156000 |
| 1 | -0.000515000 | -3.190132000 | 2.158156000  |
| 1 | -0.000675000 | -4.438619000 | 0.000000000  |

---

**PhSH**

|    |              |              |              |
|----|--------------|--------------|--------------|
| 16 | 2.294009000  | -0.083877000 | -0.000136000 |
| 6  | 0.509367000  | -0.000593000 | 0.000250000  |
| 6  | -0.194841000 | 1.212531000  | 0.000052000  |
| 6  | -0.201001000 | -1.211357000 | 0.000200000  |
| 6  | -1.591754000 | 1.209938000  | -0.000006000 |
| 6  | -1.597181000 | -1.202968000 | 0.000017000  |
| 6  | -2.300433000 | 0.005265000  | 0.000112000  |
| 1  | 0.342752000  | 2.161891000  | 0.000433000  |
| 1  | 0.338236000  | -2.160351000 | 0.000005000  |
| 1  | -2.127237000 | 2.160909000  | -0.000613000 |
| 1  | -2.137066000 | -2.151478000 | -0.000609000 |
| 1  | -3.391094000 | 0.007001000  | -0.000918000 |
| 1  | 2.525319000  | 1.247168000  | 0.000117000  |

---

**PhSeH**

|    |              |              |              |
|----|--------------|--------------|--------------|
| 34 | 1.835756000  | 0.000000000  | -0.044442000 |
| 6  | -0.110180000 | 0.000000000  | 0.007659000  |
| 6  | -0.811855000 | 1.212753000  | 0.001799000  |
| 6  | -0.811855000 | -1.212753000 | 0.001798000  |
| 6  | -2.210322000 | 1.209418000  | 0.000905000  |
| 6  | -2.210322000 | -1.209418000 | 0.000904000  |
| 6  | -2.910992000 | 0.000000000  | 0.002892000  |
| 1  | -0.265232000 | 2.156056000  | -0.002846000 |
| 1  | -0.265232000 | -2.156056000 | -0.002849000 |
| 1  | -2.751833000 | 2.157042000  | -0.001765000 |
| 1  | -2.751834000 | -2.157042000 | -0.001766000 |
| 1  | -4.002164000 | 0.000000000  | 0.001480000  |
| 1  | 2.013746000  | -0.000016000 | 1.423044000  |

---

**PhTeH**

|    |              |              |              |
|----|--------------|--------------|--------------|
| 52 | 1.577813000  | 0.000003000  | -0.033200000 |
| 6  | -0.579504000 | 0.000003000  | 0.008651000  |
| 6  | -1.283150000 | 1.212402000  | 0.002638000  |
| 6  | -1.283146000 | -1.212400000 | 0.002623000  |
| 6  | -2.682224000 | 1.209058000  | 0.000473000  |
| 6  | -2.682220000 | -1.209060000 | 0.000464000  |
| 6  | -3.383161000 | -0.000002000 | 0.001071000  |
| 1  | -0.743433000 | 2.159854000  | 0.000823000  |
| 1  | -0.743427000 | -2.159850000 | 0.000789000  |
| 1  | -3.223314000 | 2.157033000  | -0.001901000 |
| 1  | -3.223308000 | -2.157037000 | -0.001920000 |
| 1  | -4.474416000 | -0.000003000 | -0.001273000 |
| 1  | 1.722086000  | -0.000169000 | 1.634385000  |

---

**PhSP{W(CO)<sub>5</sub>}<sub>2</sub>**

|    |              |              |              |
|----|--------------|--------------|--------------|
| 74 | -1.684585000 | -1.292988000 | 0.017100000  |
| 74 | 2.611640000  | 0.302252000  | -0.001551000 |
| 15 | 0.113853000  | 0.438468000  | -0.035059000 |

---

|    |              |              |              |
|----|--------------|--------------|--------------|
| 16 | -0.305474000 | 2.500839000  | -0.138782000 |
| 8  | 0.421780000  | -3.369349000 | -1.261216000 |
| 8  | -0.754840000 | -2.124417000 | 3.004472000  |
| 8  | 2.421941000  | -2.519181000 | 1.547949000  |
| 8  | -3.719802000 | -3.774238000 | -0.003934000 |
| 8  | 5.803794000  | -0.013636000 | 0.166204000  |
| 8  | 2.635930000  | 1.949297000  | 2.781335000  |
| 8  | -2.742964000 | -0.455520000 | -2.919640000 |
| 8  | 3.044040000  | 3.087180000  | -1.584864000 |
| 8  | 2.626901000  | -1.221571000 | -2.856657000 |
| 8  | -4.109054000 | 0.356253000  | 1.374222000  |
| 6  | -2.997412000 | -2.881356000 | 0.007548000  |
| 6  | -1.068795000 | -1.831750000 | 1.942612000  |
| 6  | -0.301463000 | -2.602518000 | -0.808418000 |
| 6  | 2.464846000  | -1.513393000 | 0.996884000  |
| 6  | 2.612413000  | -0.693998000 | -1.839581000 |
| 6  | 4.662698000  | 0.101567000  | 0.101631000  |
| 6  | -2.863828000 | 2.697361000  | -1.221402000 |
| 1  | -2.430800000 | 2.313634000  | -2.144243000 |
| 6  | -3.209116000 | -0.152391000 | 0.878999000  |
| 6  | -2.360292000 | -0.746148000 | -1.878080000 |
| 6  | 2.858400000  | 2.107725000  | -1.018515000 |
| 6  | -4.209276000 | 3.068723000  | -1.174527000 |
| 1  | -4.829551000 | 2.957552000  | -2.064994000 |
| 6  | 2.628018000  | 1.356080000  | 1.800643000  |
| 6  | -2.066690000 | 2.837045000  | -0.076279000 |
| 6  | -3.954057000 | 3.739054000  | 1.138295000  |
| 1  | -4.377220000 | 4.144130000  | 2.058425000  |
| 6  | -4.756059000 | 3.586964000  | 0.003358000  |
| 1  | -5.807099000 | 3.876636000  | 0.035275000  |
| 6  | -2.609326000 | 3.365284000  | 1.103902000  |
| 1  | -1.979806000 | 3.484003000  | 1.985958000  |

---

**PhSeP{W(CO)<sub>5</sub>}<sub>2</sub>**

|    |              |              |              |
|----|--------------|--------------|--------------|
| 74 | -2.643765000 | 0.272444000  | 0.010464000  |
| 74 | 1.592646000  | -1.490039000 | 0.012786000  |
| 34 | 0.404737000  | 2.490060000  | -0.144332000 |
| 15 | -0.135385000 | 0.314997000  | -0.023677000 |
| 8  | 2.752677000  | -0.594816000 | -2.867451000 |
| 8  | -0.556394000 | -3.434284000 | -1.397711000 |
| 8  | -2.619772000 | 1.772280000  | 2.875899000  |
| 8  | -2.559099000 | -2.627393000 | 1.418255000  |
| 8  | -5.840391000 | 0.028050000  | 0.173926000  |
| 8  | -3.053898000 | 3.132188000  | -1.437069000 |
| 8  | 4.014879000  | 0.041532000  | 1.506678000  |
| 8  | 0.550089000  | -2.397473000 | 2.939916000  |
| 8  | -2.698118000 | -1.106701000 | -2.917513000 |
| 8  | 3.541488000  | -4.038306000 | -0.044209000 |
| 6  | 0.184894000  | -2.715965000 | -0.897227000 |
| 6  | -2.558813000 | -1.594692000 | 0.917976000  |
| 6  | 2.335777000  | -0.904013000 | -1.844470000 |
| 6  | 2.327211000  | 2.706533000  | -0.052249000 |
| 6  | 3.123414000  | -0.428628000 | 0.960988000  |
| 6  | -2.627859000 | 1.231960000  | 1.865113000  |
| 6  | 2.849800000  | -3.121410000 | -0.019524000 |
| 6  | -2.865992000 | 2.126682000  | -0.917621000 |
| 6  | 2.893446000  | 3.184447000  | 1.137473000  |
| 1  | 2.269017000  | 3.347027000  | 2.016366000  |

---

|   |              |              |              |
|---|--------------|--------------|--------------|
| 6 | 3.124604000  | 2.506551000  | -1.187293000 |
| 1 | 2.679441000  | 2.157720000  | -2.118287000 |
| 6 | -2.670910000 | -0.630581000 | -1.875761000 |
| 6 | -4.696827000 | 0.119817000  | 0.111335000  |
| 6 | 4.495785000  | 2.767883000  | -1.120560000 |
| 1 | 5.117256000  | 2.608798000  | -2.003051000 |
| 6 | 0.903705000  | -2.076614000 | 1.898817000  |
| 6 | 4.264140000  | 3.448502000  | 1.191420000  |
| 1 | 4.706131000  | 3.814182000  | 2.119308000  |
| 6 | 5.066309000  | 3.237155000  | 0.066291000  |
| 1 | 6.136858000  | 3.440933000  | 0.113507000  |

---

**PhTeP{W(CO)<sub>5</sub>}<sub>2</sub>**

|    |              |              |              |
|----|--------------|--------------|--------------|
| 74 | 2.695186000  | -0.307131000 | 0.020707000  |
| 74 | -1.426712000 | 1.734483000  | 0.006200000  |
| 52 | -0.597122000 | -2.515660000 | -0.124417000 |
| 15 | 0.176966000  | -0.188111000 | -0.008821000 |
| 8  | -2.760767000 | 0.782374000  | -2.778396000 |
| 8  | 0.780082000  | 3.463210000  | -1.588077000 |
| 8  | 2.600246000  | -1.617930000 | 2.976304000  |
| 8  | 2.805549000  | 2.677537000  | 1.238234000  |
| 8  | 5.897341000  | -0.210992000 | 0.166558000  |
| 8  | 3.010583000  | -3.258300000 | -1.250501000 |
| 8  | -3.814688000 | 0.365082000  | 1.700094000  |
| 8  | -0.204326000 | 2.726148000  | 2.834011000  |
| 8  | 2.796759000  | 0.881225000  | -2.989200000 |
| 8  | -3.236284000 | 4.381683000  | -0.081661000 |
| 6  | 0.012755000  | 2.824699000  | -1.023025000 |
| 6  | 2.728021000  | 1.616944000  | 0.807749000  |
| 6  | -2.284329000 | 1.110674000  | -1.787775000 |
| 6  | -2.743796000 | -2.516603000 | -0.023012000 |
| 6  | -2.948926000 | 0.788917000  | 1.080199000  |
| 6  | 2.633691000  | -1.144265000 | 1.933022000  |
| 6  | -2.593547000 | 3.429706000  | -0.045999000 |
| 6  | 2.845663000  | -2.218220000 | -0.792136000 |
| 6  | -3.366183000 | -2.907630000 | 1.171129000  |
| 1  | -2.772984000 | -3.130453000 | 2.058868000  |
| 6  | -3.515745000 | -2.235946000 | -1.159431000 |
| 1  | -3.040602000 | -1.947627000 | -2.096829000 |
| 6  | 2.754434000  | 0.473229000  | -1.919527000 |
| 6  | 4.750035000  | -0.251931000 | 0.110663000  |
| 6  | -4.909218000 | -2.330154000 | -1.091361000 |
| 1  | -5.507315000 | -2.106899000 | -1.976167000 |
| 6  | -0.619836000 | 2.372355000  | 1.826859000  |
| 6  | -4.759307000 | -3.004574000 | 1.228335000  |
| 1  | -5.240837000 | -3.302308000 | 2.160969000  |
| 6  | -5.531464000 | -2.712998000 | 0.100301000  |
| 1  | -6.618862000 | -2.786281000 | 0.149186000  |

---

**Mes<sub>2</sub>S<sub>2</sub>**

|    |              |              |              |
|----|--------------|--------------|--------------|
| 16 | 0.212198000  | 1.074476000  | 0.000229000  |
| 16 | -0.212198000 | -1.074476000 | 0.000229000  |
| 6  | 1.999868000  | 1.015430000  | 0.001822000  |
| 6  | 4.817402000  | 1.030674000  | 0.003807000  |
| 6  | 2.697556000  | 1.017292000  | 1.231716000  |
| 6  | 2.700793000  | 1.010814000  | -1.229684000 |
| 6  | 4.098634000  | 1.020928000  | -1.199438000 |
| 1  | 4.644435000  | 1.019554000  | -2.145395000 |
| 6  | 4.098634000  | 1.027722000  | 1.203423000  |

---

|   |              |              |              |
|---|--------------|--------------|--------------|
| 1 | 4.642570000  | 1.031664000  | 2.150032000  |
| 6 | 6.325662000  | 1.042852000  | -0.007274000 |
| 1 | 6.723483000  | 0.164150000  | -0.537784000 |
| 1 | 6.737947000  | 1.040434000  | 1.009527000  |
| 1 | 6.709505000  | 1.933877000  | -0.527505000 |
| 6 | 1.983119000  | 0.991014000  | -2.556013000 |
| 1 | 1.328127000  | 0.112103000  | -2.637417000 |
| 1 | 2.701772000  | 0.967154000  | -3.384302000 |
| 1 | 1.341542000  | 1.875359000  | -2.675364000 |
| 6 | 1.980271000  | 1.004250000  | 2.558261000  |
| 1 | 1.338883000  | 1.889235000  | 2.673808000  |
| 1 | 2.699102000  | 0.984355000  | 3.386536000  |
| 1 | 1.325386000  | 0.125722000  | 2.644484000  |
| 6 | -1.999868000 | -1.015430000 | 0.001822000  |
| 6 | -2.697556000 | -1.017292000 | 1.231716000  |
| 6 | -2.700793000 | -1.010814000 | -1.229684000 |
| 6 | -4.098634000 | -1.027722000 | 1.203423000  |
| 6 | -4.098634000 | -1.020928000 | -1.199438000 |
| 6 | -4.817402000 | -1.030674000 | 0.003807000  |
| 1 | -4.642570000 | -1.031664000 | 2.150032000  |
| 1 | -4.644435000 | -1.019554000 | -2.145395000 |
| 6 | -1.980271000 | -1.004250000 | 2.558261000  |
| 1 | -1.338883000 | -1.889235000 | 2.673808000  |
| 1 | -1.325386000 | -0.125722000 | 2.644484000  |
| 1 | -2.699102000 | -0.984355000 | 3.386536000  |
| 6 | -6.325662000 | -1.042852000 | -0.007274000 |
| 1 | -6.737947000 | -1.040434000 | 1.009527000  |
| 1 | -6.723483000 | -0.164150000 | -0.537784000 |
| 1 | -6.709505000 | -1.933877000 | -0.527505000 |
| 6 | -1.983119000 | -0.991014000 | -2.556013000 |
| 1 | -2.701772000 | -0.967154000 | -3.384302000 |
| 1 | -1.328127000 | -0.112103000 | -2.637417000 |
| 1 | -1.341542000 | -1.875359000 | -2.675364000 |

---

**Mes<sub>2</sub>Se<sub>2</sub>**

|    |              |              |              |
|----|--------------|--------------|--------------|
| 34 | -0.972909000 | 0.740055000  | -0.088262000 |
| 34 | 0.972909000  | -0.740055000 | -0.088262000 |
| 6  | 0.001835000  | 2.412526000  | -0.008713000 |
| 6  | 1.327748000  | 4.896299000  | 0.103549000  |
| 6  | 0.314877000  | 2.979702000  | 1.247330000  |
| 6  | 0.355588000  | 3.070668000  | -1.211867000 |
| 6  | 1.010999000  | 4.303975000  | -1.126059000 |
| 1  | 1.286053000  | 4.817049000  | -2.050096000 |
| 6  | 0.972909000  | 4.217866000  | 1.273231000  |
| 1  | 1.216616000  | 4.661539000  | 2.240562000  |
| 6  | 2.035577000  | 6.227533000  | 0.151583000  |
| 1  | 3.012316000  | 6.173747000  | -0.353435000 |
| 1  | 2.205850000  | 6.558188000  | 1.183866000  |
| 1  | 1.449949000  | 7.005228000  | -0.362204000 |
| 6  | 0.056993000  | 2.488637000  | -2.572222000 |
| 1  | 0.483145000  | 1.480912000  | -2.675305000 |
| 1  | 0.471692000  | 3.125490000  | -3.363441000 |
| 1  | -1.025355000 | 2.390849000  | -2.737552000 |
| 6  | -0.026906000 | 2.302034000  | 2.551494000  |
| 1  | -1.113703000 | 2.188764000  | 2.670980000  |
| 1  | 0.355985000  | 2.882404000  | 3.400069000  |
| 1  | 0.403037000  | 1.291716000  | 2.597520000  |
| 6  | -0.001835000 | -2.412526000 | -0.008713000 |

---

|   |              |              |              |
|---|--------------|--------------|--------------|
| 6 | -0.314877000 | -2.979702000 | 1.247330000  |
| 6 | -0.355588000 | -3.070668000 | -1.211867000 |
| 6 | -0.972909000 | -4.217866000 | 1.273231000  |
| 6 | -1.010999000 | -4.303975000 | -1.126059000 |
| 6 | -1.327748000 | -4.896299000 | 0.103549000  |
| 1 | -1.216616000 | -4.661539000 | 2.240562000  |
| 1 | -1.286053000 | -4.817049000 | -2.050096000 |
| 6 | 0.026906000  | -2.302034000 | 2.551494000  |
| 1 | 1.113703000  | -2.188764000 | 2.670980000  |
| 1 | -0.403037000 | -1.291716000 | 2.597520000  |
| 1 | -0.355985000 | -2.882404000 | 3.400069000  |
| 6 | -2.035577000 | -6.227533000 | 0.151583000  |
| 1 | -2.205850000 | -6.558188000 | 1.183866000  |
| 1 | -3.012316000 | -6.173747000 | -0.353435000 |
| 1 | -1.449949000 | -7.005228000 | -0.362204000 |
| 6 | -0.056993000 | -2.488637000 | -2.572222000 |
| 1 | -0.471692000 | -3.125490000 | -3.363441000 |
| 1 | -0.483145000 | -1.480912000 | -2.675305000 |
| 1 | 1.025355000  | -2.390849000 | -2.737552000 |

---

**Mes<sub>2</sub>Te<sub>2</sub>**

|    |              |              |              |
|----|--------------|--------------|--------------|
| 52 | -1.100419000 | 0.881831000  | -0.452938000 |
| 52 | 1.100419000  | -0.881831000 | -0.452938000 |
| 6  | 0.001626000  | 2.679616000  | 0.042900000  |
| 6  | 1.353488000  | 5.078761000  | 0.668110000  |
| 6  | 0.346728000  | 2.960121000  | 1.384163000  |
| 6  | 0.330562000  | 3.589446000  | -0.992112000 |
| 6  | 0.999054000  | 4.772274000  | -0.651264000 |
| 1  | 1.253923000  | 5.476546000  | -1.446272000 |
| 6  | 1.019140000  | 4.159710000  | 1.665432000  |
| 1  | 1.287075000  | 4.377910000  | 2.701164000  |
| 6  | 2.074636000  | 6.363895000  | 0.990379000  |
| 1  | 3.033225000  | 6.424671000  | 0.452526000  |
| 1  | 2.282798000  | 6.452331000  | 2.064094000  |
| 1  | 1.479026000  | 7.238538000  | 0.686785000  |
| 6  | -0.001626000 | 3.348606000  | -2.446828000 |
| 1  | 0.403759000  | 2.389980000  | -2.799210000 |
| 1  | 0.410295000  | 4.150740000  | -3.072002000 |
| 1  | -1.087488000 | 3.309201000  | -2.614639000 |
| 6  | 0.038060000  | 2.024011000  | 2.525549000  |
| 1  | -1.036335000 | 1.800862000  | 2.583064000  |
| 1  | 0.354718000  | 2.460385000  | 3.480874000  |
| 1  | 0.557438000  | 1.063379000  | 2.398429000  |
| 6  | -0.001626000 | -2.679616000 | 0.042900000  |
| 6  | -0.346728000 | -2.960121000 | 1.384163000  |
| 6  | -0.330562000 | -3.589446000 | -0.992112000 |
| 6  | -1.019140000 | -4.159710000 | 1.665432000  |
| 6  | -0.999054000 | -4.772274000 | -0.651264000 |
| 6  | -1.353488000 | -5.078761000 | 0.668110000  |
| 1  | -1.287075000 | -4.377910000 | 2.701164000  |
| 1  | -1.253923000 | -5.476546000 | -1.446272000 |
| 6  | -0.038060000 | -2.024011000 | 2.525549000  |
| 1  | 1.036335000  | -1.800862000 | 2.583064000  |
| 1  | -0.557438000 | -1.063379000 | 2.398429000  |
| 1  | -0.354718000 | -2.460385000 | 3.480874000  |
| 6  | -2.074636000 | -6.363895000 | 0.990379000  |
| 1  | -2.282798000 | -6.452331000 | 2.064094000  |
| 1  | -3.033225000 | -6.424671000 | 0.452526000  |

---

|   |              |              |              |
|---|--------------|--------------|--------------|
| 1 | -1.479026000 | -7.238538000 | 0.686785000  |
| 6 | 0.001626000  | -3.348606000 | -2.446828000 |
| 1 | -0.410295000 | -4.150740000 | -3.072002000 |
| 1 | -0.403759000 | -2.389980000 | -2.799210000 |
| 1 | 1.087488000  | -3.309201000 | -2.614639000 |

---

**MesS**

|    |              |              |              |
|----|--------------|--------------|--------------|
| 16 | -2.566098000 | -0.009645000 | 0.000094000  |
| 6  | -0.845372000 | -0.001525000 | -0.000037000 |
| 6  | -0.122390000 | 1.242316000  | -0.000036000 |
| 6  | -0.109505000 | -1.240561000 | -0.000056000 |
| 6  | 1.270772000  | 1.215292000  | 0.000056000  |
| 6  | 1.279842000  | -1.199925000 | 0.000048000  |
| 6  | 1.994647000  | 0.012667000  | 0.000099000  |
| 1  | 1.817356000  | 2.160221000  | 0.000142000  |
| 1  | 1.836196000  | -2.139586000 | 0.000087000  |
| 6  | -0.840379000 | 2.564672000  | -0.000105000 |
| 1  | -1.493940000 | 2.660348000  | -0.878803000 |
| 1  | -1.494193000 | 2.660358000  | 0.878396000  |
| 1  | -0.124017000 | 3.395487000  | -0.000028000 |
| 6  | 3.499387000  | 0.005294000  | 0.000016000  |
| 1  | 3.912499000  | 1.021353000  | 0.002164000  |
| 1  | 3.888814000  | -0.525485000 | 0.882829000  |
| 1  | 3.888642000  | -0.521544000 | -0.885263000 |
| 6  | -0.817000000 | -2.568871000 | -0.000102000 |
| 1  | -0.093899000 | -3.393817000 | -0.000376000 |
| 1  | -1.469760000 | -2.669727000 | 0.878606000  |
| 1  | -1.470138000 | -2.669445000 | -0.878555000 |

---

**MesSe**

|    |              |              |              |
|----|--------------|--------------|--------------|
| 34 | -2.208049000 | -0.003295000 | 0.000039000  |
| 6  | -0.283790000 | 0.001549000  | -0.000010000 |
| 6  | 0.404609000  | 1.230088000  | -0.000068000 |
| 6  | 0.411149000  | -1.226722000 | -0.000090000 |
| 6  | 1.805950000  | 1.203627000  | -0.000132000 |
| 6  | 1.809198000  | -1.194467000 | -0.000192000 |
| 6  | 2.530569000  | 0.007416000  | -0.000245000 |
| 1  | 2.344093000  | 2.154325000  | -0.000236000 |
| 1  | 2.351700000  | -2.143045000 | -0.000307000 |
| 6  | -0.340660000 | 2.539960000  | 0.000010000  |
| 1  | -0.988816000 | 2.630205000  | -0.887214000 |
| 1  | -0.989652000 | 2.629617000  | 0.886676000  |
| 1  | 0.349624000  | 3.392685000  | 0.000654000  |
| 6  | 4.039864000  | -0.001172000 | 0.000246000  |
| 1  | 4.448184000  | 1.017548000  | -0.005486000 |
| 1  | 4.435063000  | -0.517512000 | 0.888782000  |
| 1  | 4.435688000  | -0.527932000 | -0.881805000 |
| 6  | -0.329997000 | -2.539088000 | 0.000036000  |
| 1  | 0.363094000  | -3.389486000 | -0.000626000 |
| 1  | -0.977747000 | -2.630958000 | 0.887341000  |
| 1  | -0.978935000 | -2.630555000 | -0.886443000 |

---

**MesTe**

|    |              |              |              |
|----|--------------|--------------|--------------|
| 52 | -2.000477000 | -0.002264000 | -0.000096000 |
| 6  | 0.125745000  | 0.001931000  | 0.000117000  |
| 6  | 2.957982000  | 0.007676000  | -0.000105000 |
| 6  | 0.835531000  | 1.235316000  | 0.000127000  |
| 6  | 0.841702000  | -1.231106000 | 0.000087000  |
| 6  | 2.238250000  | -1.196051000 | -0.000019000 |
| 1  | 2.787353000  | -2.140119000 | -0.000019000 |

---



|   |              |              |              |
|---|--------------|--------------|--------------|
| 6 | 2.235574000  | 1.205820000  | -0.000014000 |
| 1 | 2.780474000  | 2.151898000  | -0.000008000 |
| 6 | 4.464583000  | -0.002352000 | -0.000221000 |
| 1 | 4.854802000  | -0.528890000 | 0.884504000  |
| 1 | 4.877361000  | 1.014114000  | -0.000652000 |
| 1 | 4.854603000  | -0.529578000 | -0.884622000 |
| 6 | 0.158886000  | -2.577526000 | 0.000302000  |
| 1 | -0.487386000 | -2.700194000 | 0.880661000  |
| 1 | 0.901426000  | -3.385359000 | -0.000063000 |
| 1 | -0.488301000 | -2.700099000 | -0.879368000 |
| 6 | 0.149763000  | 2.580133000  | 0.000305000  |
| 1 | -0.496643000 | 2.701958000  | -0.880031000 |
| 1 | 0.890467000  | 3.389677000  | 0.000963000  |
| 1 | -0.497456000 | 2.701264000  | 0.880139000  |

---

**MesSH**

|    |              |              |              |
|----|--------------|--------------|--------------|
| 16 | -2.569373000 | 0.069146000  | 0.000063000  |
| 6  | -0.776412000 | -0.015233000 | 0.000035000  |
| 6  | -0.096002000 | 1.220776000  | -0.000020000 |
| 6  | -0.060586000 | -1.233872000 | 0.000021000  |
| 6  | 1.304712000  | 1.215585000  | -0.000084000 |
| 6  | 1.338249000  | -1.177912000 | -0.000076000 |
| 6  | 2.045870000  | 0.030510000  | -0.000122000 |
| 1  | 1.828477000  | 2.173934000  | -0.000203000 |
| 1  | 1.894338000  | -2.118261000 | -0.000109000 |
| 6  | -0.850653000 | 2.526289000  | 0.000015000  |
| 1  | -1.501804000 | 2.614606000  | -0.884401000 |
| 1  | -1.501597000 | 2.614660000  | 0.884575000  |
| 1  | -0.160515000 | 3.378452000  | -0.000096000 |
| 6  | 3.555215000  | 0.040772000  | 0.000087000  |
| 1  | 3.950257000  | 1.064736000  | -0.003146000 |
| 1  | 3.957381000  | -0.472602000 | 0.887234000  |
| 1  | 3.957713000  | -0.478435000 | -0.883472000 |
| 6  | -0.746123000 | -2.577209000 | 0.000040000  |
| 1  | -0.008443000 | -3.388455000 | 0.000190000  |
| 1  | -1.384997000 | -2.709809000 | 0.888307000  |
| 1  | -1.384794000 | -2.709937000 | -0.888359000 |
| 1  | -2.821669000 | -1.253447000 | -0.000886000 |

---

**MesSeH**

|    |              |              |              |
|----|--------------|--------------|--------------|
| 34 | -0.332943000 | 2.177651000  | 0.000000000  |
| 6  | 0.000000000  | 0.266241000  | 0.000000000  |
| 6  | -1.144838000 | -0.557251000 | 0.000000000  |
| 6  | 1.296058000  | -0.295682000 | 0.000000000  |
| 6  | -0.971635000 | -1.947894000 | 0.000000000  |
| 6  | 1.408198000  | -1.691989000 | 0.000000000  |
| 6  | 0.294036000  | -2.539969000 | 0.000000000  |
| 1  | -1.859746000 | -2.583540000 | 0.000000000  |
| 1  | 2.408525000  | -2.130982000 | 0.000000000  |
| 6  | -2.535507000 | 0.026556000  | 0.000000000  |
| 1  | -2.706722000 | 0.659279000  | 0.885915000  |
| 1  | -2.706722000 | 0.659279000  | -0.885915000 |
| 1  | -3.294492000 | -0.764835000 | 0.000000000  |
| 6  | 0.466440000  | -4.039397000 | 0.000000000  |
| 1  | -0.502056000 | -4.555695000 | 0.000000000  |
| 1  | 1.027853000  | -4.375824000 | -0.885334000 |
| 1  | 1.027853000  | -4.375824000 | 0.885334000  |
| 6  | 2.552495000  | 0.538485000  | 0.000000000  |
| 1  | 3.442223000  | -0.102505000 | 0.000000000  |

---

|   |             |             |              |
|---|-------------|-------------|--------------|
| 1 | 2.608900000 | 1.188274000 | -0.887666000 |
| 1 | 2.608900000 | 1.188274000 | 0.887666000  |
| 1 | 1.074083000 | 2.599377000 | 0.000000000  |

---

**MesTeH**

|    |              |              |              |
|----|--------------|--------------|--------------|
| 52 | -1.990096000 | 0.027794000  | 0.000016000  |
| 6  | 0.169661000  | -0.045820000 | -0.000015000 |
| 6  | 0.824219000  | 1.202924000  | -0.000017000 |
| 6  | 0.909059000  | -1.248994000 | 0.000006000  |
| 6  | 2.226365000  | 1.228891000  | -0.000019000 |
| 6  | 2.308058000  | -1.162837000 | -0.000010000 |
| 6  | 2.990597000  | 0.059520000  | -0.000032000 |
| 1  | 2.730821000  | 2.197636000  | -0.000019000 |
| 1  | 2.884284000  | -2.091038000 | 0.000008000  |
| 6  | 0.059416000  | 2.503442000  | 0.000003000  |
| 1  | -0.587802000 | 2.591019000  | -0.888108000 |
| 1  | -0.587818000 | 2.590996000  | 0.888105000  |
| 1  | 0.740417000  | 3.363014000  | 0.000033000  |
| 6  | 4.499194000  | 0.100011000  | 0.000004000  |
| 1  | 4.874296000  | 1.131415000  | -0.000375000 |
| 1  | 4.910768000  | -0.408566000 | 0.885489000  |
| 1  | 4.910834000  | -0.409257000 | -0.885049000 |
| 6  | 0.268501000  | -2.614448000 | 0.000056000  |
| 1  | 1.032892000  | -3.400862000 | 0.000221000  |
| 1  | -0.367263000 | -2.762616000 | 0.886445000  |
| 1  | -0.367040000 | -2.762787000 | -0.886467000 |
| 1  | -2.219818000 | -1.620364000 | -0.000964000 |

---

**MesSP{W(CO)<sub>5</sub>}<sub>2</sub>**

|    |              |              |              |
|----|--------------|--------------|--------------|
| 74 | 2.754850000  | -0.648601000 | -0.000189000 |
| 74 | -1.145917000 | 1.769384000  | -0.000317000 |
| 16 | -0.531493000 | -2.232441000 | 0.001840000  |
| 15 | 0.276404000  | -0.289791000 | 0.000757000  |
| 8  | -2.599509000 | 4.627580000  | -0.003248000 |
| 8  | 5.946352000  | -1.011004000 | -0.001484000 |
| 8  | 1.531928000  | 3.552067000  | -0.005361000 |
| 8  | 2.503759000  | -2.950858000 | -2.254150000 |
| 8  | 3.084401000  | 1.585806000  | 2.310159000  |
| 8  | -4.182475000 | 0.675431000  | 0.003334000  |
| 8  | 3.082120000  | 1.579878000  | -2.316598000 |
| 8  | -1.202200000 | 1.742926000  | 3.235341000  |
| 8  | 2.505859000  | -2.945161000 | 2.259819000  |
| 8  | -1.208072000 | 1.733722000  | -3.235739000 |
| 6  | 2.585873000  | -2.130848000 | -1.456969000 |
| 6  | 0.609507000  | 2.868839000  | -0.003537000 |
| 6  | -2.325214000 | -2.240036000 | 0.003345000  |
| 6  | 4.804758000  | -0.881268000 | -0.000984000 |
| 6  | -2.088299000 | 3.598665000  | -0.002141000 |
| 6  | 2.955513000  | 0.803106000  | 1.481958000  |
| 6  | -5.116951000 | -2.528984000 | 0.005440000  |
| 6  | -3.009151000 | -2.317607000 | 1.236274000  |
| 6  | -3.011918000 | -2.322360000 | -1.231098000 |
| 6  | 2.587300000  | -2.127165000 | 1.460504000  |
| 6  | -3.067506000 | 0.943757000  | 0.002445000  |
| 6  | 2.954036000  | 0.799323000  | -1.486252000 |
| 6  | -4.401507000 | -2.462986000 | -1.198058000 |
| 1  | -4.944113000 | -2.525208000 | -2.143439000 |
| 6  | -4.402026000 | -2.457750000 | 1.205269000  |
| 1  | -4.942990000 | -2.515121000 | 2.151492000  |

---

|   |              |              |              |
|---|--------------|--------------|--------------|
| 6 | -6.617348000 | -2.673050000 | -0.006111000 |
| 1 | -7.087819000 | -1.815022000 | -0.509714000 |
| 1 | -7.026514000 | -2.735525000 | 1.009660000  |
| 1 | -6.923069000 | -3.577072000 | -0.554103000 |
| 6 | -1.176822000 | 1.749353000  | -2.089976000 |
| 6 | -1.172962000 | 1.755287000  | 2.089496000  |
| 6 | -2.293789000 | -2.270431000 | -2.556698000 |
| 1 | -1.792783000 | -1.303300000 | -2.707038000 |
| 1 | -2.998181000 | -2.417201000 | -3.383598000 |
| 1 | -1.514670000 | -3.043074000 | -2.624439000 |
| 6 | -2.291806000 | -2.261147000 | 2.562014000  |
| 1 | -1.508432000 | -3.029329000 | 2.630590000  |
| 1 | -2.995577000 | -2.411434000 | 3.388826000  |
| 1 | -1.796455000 | -1.291058000 | 2.712299000  |

---

**MesSeP{W(CO)<sub>5</sub>}<sub>2</sub>**

|    |              |              |              |
|----|--------------|--------------|--------------|
| 74 | 2.800527000  | -0.632135000 | -0.000473000 |
| 74 | -1.024424000 | 1.910858000  | -0.000284000 |
| 34 | -0.604449000 | -2.239098000 | 0.003823000  |
| 15 | 0.325632000  | -0.201271000 | 0.001050000  |
| 8  | -2.368301000 | 4.820790000  | -0.002328000 |
| 8  | 5.984282000  | -1.040996000 | -0.003575000 |
| 8  | 1.708326000  | 3.608073000  | -0.001750000 |
| 8  | 2.526269000  | -2.921021000 | -2.264590000 |
| 8  | 3.175834000  | 1.589912000  | 2.315757000  |
| 8  | -4.104077000 | 0.946471000  | -0.000751000 |
| 8  | 3.172083000  | 1.587992000  | -2.319096000 |
| 8  | -1.084617000 | 1.867263000  | 3.235250000  |
| 8  | 2.530713000  | -2.919037000 | 2.266206000  |
| 8  | -1.084514000 | 1.863390000  | -3.235777000 |
| 6  | 2.613822000  | -2.106200000 | -1.462267000 |
| 6  | 0.766127000  | 2.952254000  | -0.001095000 |
| 6  | -2.538993000 | -2.106949000 | 0.003686000  |
| 6  | 4.844213000  | -0.896370000 | -0.002373000 |
| 6  | -1.897142000 | 3.772634000  | -0.001552000 |
| 6  | 3.029433000  | 0.812925000  | 1.485304000  |
| 6  | -5.344748000 | -2.181635000 | 0.003509000  |
| 6  | -3.227111000 | -2.128830000 | 1.235530000  |
| 6  | -3.228231000 | -2.135122000 | -1.230777000 |
| 6  | 2.616611000  | -2.104939000 | 1.462971000  |
| 6  | -2.978098000 | 1.164274000  | -0.000133000 |
| 6  | 3.026982000  | 0.811670000  | -1.487784000 |
| 6  | -4.625391000 | -2.169784000 | -1.199021000 |
| 1  | -5.170416000 | -2.188125000 | -2.144876000 |
| 6  | -4.627500000 | -2.162885000 | 1.203533000  |
| 1  | -5.172184000 | -2.175282000 | 2.149293000  |
| 6  | -6.851857000 | -2.211368000 | -0.009114000 |
| 1  | -7.255675000 | -1.319625000 | -0.512015000 |
| 1  | -7.265267000 | -2.243711000 | 1.006371000  |
| 1  | -7.224906000 | -3.089051000 | -0.558202000 |
| 6  | -1.053576000 | 1.885401000  | -2.090100000 |
| 6  | -1.053631000 | 1.887986000  | 2.089549000  |
| 6  | -2.515328000 | -2.128822000 | -2.561361000 |
| 1  | -1.918851000 | -1.215137000 | -2.695246000 |
| 1  | -3.235805000 | -2.186263000 | -3.385601000 |
| 1  | -1.820580000 | -2.976084000 | -2.653368000 |
| 6  | -2.516800000 | -2.116232000 | 2.567370000  |
| 1  | -1.819103000 | -2.960592000 | 2.663241000  |

---

|   |              |              |             |
|---|--------------|--------------|-------------|
| 1 | -3.238541000 | -2.174140000 | 3.390491000 |
| 1 | -1.924193000 | -1.199868000 | 2.700164000 |

---

**MesTeP{W(CO)<sub>5</sub>}<sub>2</sub>**

|    |              |              |              |
|----|--------------|--------------|--------------|
| 74 | -2.857325000 | -0.668819000 | 0.032305000  |
| 74 | 0.826299000  | 2.086314000  | -0.001125000 |
| 52 | 0.756377000  | -2.267904000 | -0.202522000 |
| 15 | -0.395048000 | -0.112256000 | -0.036375000 |
| 8  | 2.020341000  | 5.058437000  | -0.053847000 |
| 8  | -1.944497000 | 3.586447000  | -0.660435000 |
| 8  | -3.305480000 | 1.848914000  | 2.004270000  |
| 8  | -6.017124000 | -1.172842000 | 0.238654000  |
| 8  | 3.875578000  | 1.270605000  | 0.674129000  |
| 8  | -2.399269000 | -2.622484000 | 2.564330000  |
| 8  | 1.481422000  | 1.768857000  | -3.150904000 |
| 8  | -2.648954000 | -3.226824000 | -1.928088000 |
| 8  | -3.356840000 | 1.175478000  | -2.578788000 |
| 6  | -0.984044000 | 3.003521000  | -0.425547000 |
| 8  | 0.271538000  | 2.353987000  | 3.178031000  |
| 6  | 3.655589000  | -1.788206000 | -1.207904000 |
| 6  | 3.484692000  | -1.987603000 | 1.241339000  |
| 6  | 2.881707000  | -1.934739000 | -0.036981000 |
| 6  | 1.601646000  | 3.987902000  | -0.032093000 |
| 6  | -4.883670000 | -0.996252000 | 0.161427000  |
| 6  | 1.242675000  | 1.882806000  | -2.034801000 |
| 6  | 5.676654000  | -1.714311000 | 0.178258000  |
| 6  | -3.124762000 | 0.963989000  | 1.297398000  |
| 6  | 5.046802000  | -1.675084000 | -1.068657000 |
| 1  | 5.654327000  | -1.556327000 | -1.967765000 |
| 6  | -2.559315000 | -1.922191000 | 1.670084000  |
| 6  | 2.768850000  | 1.448957000  | 0.432291000  |
| 6  | 3.057841000  | -1.752900000 | -2.594760000 |
| 1  | 2.483701000  | -2.665199000 | -2.813094000 |
| 1  | 3.845203000  | -1.661493000 | -3.352366000 |
| 1  | 2.370390000  | -0.905345000 | -2.720826000 |
| 6  | 0.456988000  | 2.259812000  | 2.051223000  |
| 6  | 4.876816000  | -1.874849000 | 1.316948000  |
| 1  | 5.352211000  | -1.907874000 | 2.299345000  |
| 6  | -3.170099000 | 0.537887000  | -1.645015000 |
| 6  | 2.695529000  | -2.147753000 | 2.519547000  |
| 1  | 1.978487000  | -1.325739000 | 2.657350000  |
| 1  | 3.365147000  | -2.161293000 | 3.387669000  |
| 1  | 2.113804000  | -3.081212000 | 2.526133000  |
| 6  | -2.694868000 | -2.317230000 | -1.229198000 |
| 6  | 7.173212000  | -1.587129000 | 0.307139000  |
| 1  | 7.656429000  | -1.476715000 | -0.671435000 |
| 1  | 7.603189000  | -2.470900000 | 0.802433000  |
| 1  | 7.440003000  | -0.712126000 | 0.918962000  |

---

**Cp\*P{W(CO)<sub>5</sub>}<sub>2</sub>·SHPH**

|    |              |              |              |
|----|--------------|--------------|--------------|
| 16 | 0.210895000  | 1.918311000  | 1.409102000  |
| 15 | -0.128548000 | 0.401365000  | -0.402783000 |
| 74 | -2.562710000 | -0.505106000 | 0.465790000  |
| 74 | 1.732394000  | -1.520606000 | -0.646159000 |

---

|   |              |              |              |
|---|--------------|--------------|--------------|
| 6 | -0.034543000 | 1.893325000  | -1.760914000 |
| 6 | 2.775151000  | -3.243440000 | -0.795692000 |
| 6 | 2.644114000  | -0.969415000 | -2.416023000 |
| 6 | 1.056411000  | -2.247906000 | 1.182939000  |
| 6 | 0.276561000  | -2.446638000 | -1.809514000 |
| 6 | 3.391125000  | -0.737133000 | 0.323483000  |
| 6 | -4.333664000 | -1.148987000 | 1.178009000  |
| 6 | -3.332539000 | -0.677573000 | -1.462323000 |
| 6 | -1.841083000 | -0.505784000 | 2.398273000  |
| 6 | -3.280004000 | 1.410375000  | 0.798220000  |
| 6 | -2.077802000 | -2.522436000 | 0.351989000  |
| 6 | -1.162777000 | 2.904675000  | -1.598994000 |
| 6 | -0.639691000 | 4.113972000  | -1.260938000 |
| 6 | 0.832976000  | 4.015453000  | -1.237374000 |
| 6 | 1.212096000  | 2.741702000  | -1.563269000 |
| 6 | -0.097574000 | 1.190037000  | -3.129122000 |
| 6 | -2.568333000 | 2.658250000  | -2.045872000 |
| 6 | -1.367289000 | 5.407787000  | -1.049048000 |
| 6 | 1.709127000  | 5.207343000  | -0.982798000 |
| 6 | 2.608575000  | 2.263743000  | -1.787547000 |
| 8 | -3.792291000 | -0.840623000 | -2.503409000 |
| 8 | -5.354997000 | -1.498966000 | 1.587860000  |
| 8 | -1.930758000 | -3.661905000 | 0.361242000  |
| 8 | -3.745072000 | 2.428738000  | 1.067158000  |
| 8 | -1.466230000 | -0.527618000 | 3.488302000  |
| 8 | 3.355785000  | -4.237341000 | -0.873927000 |
| 8 | 0.783611000  | -2.700935000 | 2.202869000  |
| 8 | -0.449224000 | -2.987097000 | -2.516173000 |
| 8 | 4.388859000  | -0.405014000 | 0.791039000  |
| 8 | 3.223055000  | -0.750719000 | -3.387855000 |
| 1 | -1.015021000 | 0.598207000  | -3.236314000 |
| 1 | 0.755286000  | 0.525906000  | -3.289895000 |
| 1 | -0.092945000 | 1.949736000  | -3.923559000 |
| 1 | -2.917823000 | 1.653355000  | -1.805427000 |
| 1 | -2.638850000 | 2.764585000  | -3.141056000 |
| 1 | -3.269981000 | 3.374149000  | -1.604424000 |
| 1 | -1.068475000 | 5.886314000  | -0.103583000 |
| 1 | -2.453125000 | 5.269838000  | -1.022714000 |
| 1 | -1.140399000 | 6.129058000  | -1.850986000 |
| 1 | 1.496892000  | 5.661033000  | -0.001959000 |
| 1 | 1.524290000  | 5.993423000  | -1.730145000 |
| 1 | 2.775804000  | 4.961781000  | -1.018311000 |
| 1 | 2.877307000  | 1.436403000  | -1.119511000 |
| 1 | 3.336468000  | 3.068841000  | -1.639515000 |
| 1 | 2.740917000  | 1.892468000  | -2.813728000 |
| 1 | 0.619979000  | 2.917411000  | 0.553738000  |
| 6 | 1.788711000  | 1.708970000  | 2.239349000  |
| 6 | 1.861347000  | 0.775051000  | 3.280570000  |
| 6 | 2.885368000  | 2.520707000  | 1.921594000  |

|   |             |              |             |
|---|-------------|--------------|-------------|
| 6 | 3.051427000 | 0.650111000  | 3.999620000 |
| 6 | 4.064059000 | 2.391646000  | 2.656261000 |
| 6 | 4.150968000 | 1.454978000  | 3.690192000 |
| 1 | 0.998300000 | 0.162068000  | 3.536999000 |
| 1 | 2.818797000 | 3.249143000  | 1.114903000 |
| 1 | 3.113621000 | -0.079087000 | 4.807598000 |
| 1 | 4.920076000 | 3.021528000  | 2.412976000 |
| 1 | 5.077947000 | 1.352059000  | 4.255085000 |

---

**Cp\*P{W(CO)<sub>5</sub>}<sub>2</sub>·SeHPh**

|    |              |              |              |
|----|--------------|--------------|--------------|
| 74 | -1.952273000 | 0.925033000  | -0.958416000 |
| 6  | -0.850187000 | -1.869775000 | 1.659566000  |
| 6  | -3.276466000 | 1.395775000  | -2.400678000 |
| 6  | -3.559041000 | 0.669918000  | 0.344419000  |
| 6  | -0.438769000 | 1.395360000  | -2.299603000 |
| 6  | -2.224932000 | -0.972227000 | -1.816277000 |
| 6  | -2.091466000 | 2.958990000  | -0.523306000 |
| 6  | -1.999332000 | -1.387655000 | 2.533126000  |
| 6  | -3.141124000 | -2.007780000 | 2.133306000  |
| 6  | -2.856703000 | -2.903161000 | 1.001206000  |
| 6  | -1.526342000 | -2.868208000 | 0.718635000  |
| 6  | 0.257436000  | -2.504207000 | 2.517426000  |
| 6  | -1.861381000 | -0.599924000 | 3.810625000  |
| 6  | -4.484026000 | -1.926947000 | 2.793275000  |
| 6  | -3.921756000 | -3.731796000 | 0.349022000  |
| 6  | -0.796107000 | -3.728653000 | -0.264098000 |
| 8  | -4.031409000 | 1.622067000  | -3.242865000 |
| 8  | 0.329954000  | 1.722640000  | -3.084446000 |
| 8  | -2.470079000 | -1.917361000 | -2.413406000 |
| 8  | -2.270174000 | 4.085413000  | -0.389304000 |
| 8  | -4.520778000 | 0.674571000  | 0.970600000  |
| 1  | 0.741238000  | -1.764411000 | 3.167380000  |
| 1  | 1.032587000  | -2.970435000 | 1.904674000  |
| 1  | -0.186722000 | -3.281909000 | 3.154945000  |
| 1  | -2.296519000 | -1.159830000 | 4.651893000  |
| 1  | -2.382956000 | 0.367894000  | 3.772350000  |
| 1  | -0.818004000 | -0.391128000 | 4.065120000  |
| 1  | -5.285268000 | -1.768105000 | 2.057747000  |
| 1  | -4.536235000 | -1.110980000 | 3.522197000  |
| 1  | -4.719057000 | -2.866545000 | 3.319358000  |
| 1  | -4.705957000 | -3.093559000 | -0.087951000 |
| 1  | -4.422680000 | -4.382051000 | 1.083201000  |
| 1  | -3.528325000 | -4.367371000 | -0.450588000 |
| 1  | -0.207129000 | -3.150935000 | -0.988393000 |
| 1  | -1.492347000 | -4.350115000 | -0.836899000 |
| 1  | -0.091560000 | -4.405360000 | 0.241687000  |
| 74 | 2.411988000  | -1.005165000 | -0.492702000 |
| 6  | 4.242350000  | -1.286442000 | -1.285287000 |
| 6  | 3.268146000  | -0.834684000 | 1.385187000  |
| 6  | 1.566142000  | -1.329863000 | -2.362458000 |
| 6  | 2.760856000  | 0.996643000  | -0.950501000 |
| 6  | 2.446205000  | -3.051233000 | -0.211509000 |
| 8  | 5.293780000  | -1.437010000 | -1.737580000 |

---

|    |              |              |              |
|----|--------------|--------------|--------------|
| 8  | 3.090865000  | 2.045020000  | -1.282946000 |
| 8  | 3.776087000  | -0.806847000 | 2.418116000  |
| 8  | 2.598733000  | -4.187506000 | -0.102653000 |
| 8  | 1.126264000  | -1.555459000 | -3.400016000 |
| 15 | -0.064832000 | -0.497997000 | 0.477840000  |
| 34 | -0.311305000 | 1.440076000  | 1.788735000  |
| 6  | 1.257090000  | 2.562964000  | 1.613655000  |
| 6  | 1.199228000  | 3.741491000  | 0.858324000  |
| 6  | 2.393599000  | 2.269997000  | 2.380586000  |
| 6  | 2.290898000  | 4.612906000  | 0.855206000  |
| 6  | 3.481100000  | 3.145736000  | 2.366810000  |
| 6  | 3.433122000  | 4.315375000  | 1.602362000  |
| 1  | 0.312981000  | 3.987801000  | 0.278782000  |
| 1  | 2.429447000  | 1.370775000  | 2.991915000  |
| 1  | 2.246235000  | 5.525544000  | 0.259925000  |
| 1  | 4.365743000  | 2.911795000  | 2.960551000  |
| 1  | 4.285260000  | 4.996160000  | 1.592107000  |

---

**Cp\*P{W(CO)<sub>5</sub>}<sub>2</sub>·TeHPh**

|    |              |              |              |
|----|--------------|--------------|--------------|
| 52 | 0.291815000  | 2.112856000  | 1.232046000  |
| 15 | -0.166935000 | 0.246070000  | -0.578623000 |
| 74 | -2.615419000 | -0.543022000 | 0.512741000  |
| 74 | 1.622738000  | -1.788867000 | -0.706210000 |
| 6  | -0.106433000 | 1.563049000  | -2.104401000 |
| 6  | 2.621130000  | -3.538627000 | -0.700851000 |
| 6  | 2.421285000  | -1.505379000 | -2.590633000 |
| 6  | 1.034281000  | -2.281903000 | 1.226092000  |
| 6  | 0.076783000  | -2.792066000 | -1.671662000 |
| 6  | 3.342027000  | -0.911177000 | 0.050142000  |
| 6  | -4.352371000 | -1.104449000 | 1.350232000  |
| 6  | -3.468022000 | -0.840858000 | -1.367639000 |
| 6  | -1.804454000 | -0.409229000 | 2.399898000  |
| 6  | -3.322195000 | 1.388081000  | 0.729852000  |
| 6  | -2.167526000 | -2.575582000 | 0.550775000  |
| 6  | -1.154295000 | 2.661678000  | -1.963708000 |
| 6  | -0.532219000 | 3.870851000  | -1.884123000 |
| 6  | 0.921295000  | 3.679237000  | -2.016615000 |
| 6  | 1.196046000  | 2.346937000  | -2.163178000 |
| 6  | -0.349631000 | 0.707153000  | -3.363642000 |
| 6  | -2.614910000 | 2.451708000  | -2.207407000 |
| 6  | -1.168815000 | 5.226357000  | -1.802484000 |
| 6  | 1.877974000  | 4.834952000  | -2.064736000 |
| 6  | 2.538194000  | 1.752660000  | -2.432493000 |
| 8  | -3.971643000 | -1.061641000 | -2.376649000 |
| 8  | -5.357761000 | -1.409485000 | 1.830927000  |
| 8  | -2.049470000 | -3.712146000 | 0.665089000  |
| 8  | -3.786297000 | 2.421439000  | 0.943452000  |
| 8  | -1.377658000 | -0.350590000 | 3.471216000  |
| 8  | 3.181591000  | -4.547975000 | -0.686809000 |
| 8  | 0.799383000  | -2.615964000 | 2.300684000  |
| 8  | -0.701934000 | -3.378038000 | -2.279285000 |
| 8  | 4.364390000  | -0.515787000 | 0.401684000  |
| 8  | 2.926706000  | -1.446926000 | -3.624382000 |
| 1  | -1.309813000 | 0.179668000  | -3.313831000 |

---

|   |              |              |              |
|---|--------------|--------------|--------------|
| 1 | 0.439419000  | -0.036163000 | -3.509281000 |
| 1 | -0.368805000 | 1.362333000  | -4.246312000 |
| 1 | -2.970032000 | 1.494250000  | -1.824201000 |
| 1 | -2.819657000 | 2.455448000  | -3.291039000 |
| 1 | -3.226036000 | 3.242814000  | -1.758975000 |
| 1 | -0.726452000 | 5.831526000  | -0.996143000 |
| 1 | -2.247090000 | 5.165749000  | -1.621415000 |
| 1 | -1.017978000 | 5.792547000  | -2.736052000 |
| 1 | 1.776240000  | 5.478773000  | -1.177297000 |
| 1 | 1.670438000  | 5.476748000  | -2.935172000 |
| 1 | 2.922714000  | 4.514075000  | -2.130081000 |
| 1 | 2.827640000  | 1.023347000  | -1.665794000 |
| 1 | 3.314832000  | 2.524014000  | -2.475142000 |
| 1 | 2.555472000  | 1.219384000  | -3.393789000 |
| 1 | 1.100403000  | 3.044917000  | 0.080529000  |
| 6 | 2.124870000  | 1.634463000  | 2.240749000  |
| 6 | 2.093443000  | 0.702783000  | 3.285845000  |
| 6 | 3.306840000  | 2.314313000  | 1.920042000  |
| 6 | 3.263474000  | 0.446344000  | 4.006728000  |
| 6 | 4.466822000  | 2.052020000  | 2.652541000  |
| 6 | 4.447280000  | 1.118559000  | 3.692562000  |
| 1 | 1.175302000  | 0.176441000  | 3.546188000  |
| 1 | 3.336457000  | 3.036844000  | 1.104568000  |
| 1 | 3.243203000  | -0.283290000 | 4.816861000  |
| 1 | 5.390587000  | 2.574040000  | 2.400259000  |
| 1 | 5.357457000  | 0.912359000  | 4.257017000  |

---

**Cp\*P{W(CO)<sub>5</sub>}<sub>2</sub>·SPh**

|    |              |              |              |
|----|--------------|--------------|--------------|
| 74 | -1.992750000 | 1.005900000  | -0.807302000 |
| 6  | -0.751392000 | -1.954454000 | 1.588454000  |
| 6  | -3.336923000 | 1.514408000  | -2.212286000 |
| 6  | -3.582615000 | 0.566188000  | 0.467793000  |
| 6  | -0.506190000 | 1.658050000  | -2.101454000 |
| 6  | -2.173835000 | -0.830207000 | -1.808053000 |
| 6  | -2.248005000 | 2.992674000  | -0.219931000 |
| 6  | -1.895187000 | -1.566812000 | 2.513194000  |
| 6  | -3.023616000 | -2.201197000 | 2.098306000  |
| 6  | -2.734852000 | -3.011664000 | 0.904050000  |
| 6  | -1.413430000 | -2.911818000 | 0.597174000  |
| 6  | 0.394548000  | -2.605744000 | 2.381972000  |
| 6  | -1.752423000 | -0.841643000 | 3.825755000  |
| 6  | -4.353406000 | -2.208027000 | 2.788966000  |
| 6  | -3.786347000 | -3.830462000 | 0.218145000  |
| 6  | -0.674190000 | -3.675414000 | -0.456433000 |
| 8  | -4.103666000 | 1.767030000  | -3.036654000 |
| 8  | 0.243786000  | 2.087417000  | -2.854549000 |
| 8  | -2.375209000 | -1.740713000 | -2.471522000 |
| 8  | -2.493920000 | 4.092226000  | -0.000251000 |
| 8  | -4.542301000 | 0.470030000  | 1.088945000  |
| 1  | 0.863730000  | -1.895777000 | 3.074564000  |
| 1  | 1.174446000  | -2.999313000 | 1.725498000  |
| 1  | -0.009955000 | -3.441203000 | 2.970889000  |
| 1  | -2.130766000 | -1.464066000 | 4.650482000  |
| 1  | -2.318279000 | 0.100972000  | 3.850453000  |

---



|    |              |              |              |
|----|--------------|--------------|--------------|
| 1  | -0.712345000 | -0.591789000 | 4.055414000  |
| 1  | -5.176070000 | -2.030815000 | 2.081824000  |
| 1  | -4.415051000 | -1.441840000 | 3.569492000  |
| 1  | -4.545306000 | -3.186178000 | 3.259306000  |
| 1  | -4.598490000 | -3.191070000 | -0.162481000 |
| 1  | -4.252350000 | -4.542918000 | 0.916784000  |
| 1  | -3.388591000 | -4.399978000 | -0.627918000 |
| 1  | -0.120736000 | -3.027935000 | -1.149579000 |
| 1  | -1.359959000 | -4.280113000 | -1.059156000 |
| 1  | 0.064095000  | -4.359755000 | -0.012534000 |
| 74 | 2.443382000  | -0.789125000 | -0.528450000 |
| 6  | 4.263095000  | -0.929461000 | -1.381903000 |
| 6  | 3.357387000  | -0.764317000 | 1.330883000  |
| 6  | 1.578754000  | -0.972476000 | -2.408731000 |
| 6  | 2.708466000  | 1.261331000  | -0.781472000 |
| 6  | 2.545815000  | -2.850481000 | -0.431949000 |
| 8  | 5.307021000  | -0.999546000 | -1.869261000 |
| 8  | 2.988582000  | 2.353711000  | -0.996986000 |
| 8  | 3.912533000  | -0.817845000 | 2.337877000  |
| 8  | 2.733122000  | -3.986514000 | -0.422318000 |
| 8  | 1.135474000  | -1.120098000 | -3.458699000 |
| 15 | -0.036209000 | -0.479079000 | 0.501830000  |
| 16 | -0.416212000 | 1.252478000  | 1.809262000  |
| 6  | 1.010226000  | 2.337385000  | 1.914279000  |
| 6  | 0.973404000  | 3.610777000  | 1.329738000  |
| 6  | 2.099283000  | 1.962583000  | 2.715199000  |
| 6  | 2.034985000  | 4.495006000  | 1.531189000  |
| 6  | 3.158284000  | 2.850690000  | 2.905600000  |
| 6  | 3.130290000  | 4.116279000  | 2.311224000  |
| 1  | 0.122007000  | 3.915721000  | 0.726590000  |
| 1  | 2.112350000  | 0.987341000  | 3.197040000  |
| 1  | 2.005592000  | 5.481729000  | 1.068096000  |
| 1  | 4.004821000  | 2.551594000  | 3.524631000  |
| 1  | 3.960502000  | 4.807839000  | 2.459678000  |

---

**Cp\*P{W(CO)<sub>5</sub>}<sub>2</sub>·SePh**

|    |              |              |              |
|----|--------------|--------------|--------------|
| 74 | -1.952273000 | 0.925033000  | -0.958416000 |
| 6  | -0.850187000 | -1.869775000 | 1.659566000  |
| 6  | -3.276466000 | 1.395775000  | -2.400678000 |
| 6  | -3.559041000 | 0.669918000  | 0.344419000  |
| 6  | -0.438769000 | 1.395360000  | -2.299603000 |
| 6  | -2.224932000 | -0.972227000 | -1.816277000 |
| 6  | -2.091466000 | 2.958990000  | -0.523306000 |
| 6  | -1.999332000 | -1.387655000 | 2.533126000  |
| 6  | -3.141124000 | -2.007780000 | 2.133306000  |
| 6  | -2.856703000 | -2.903161000 | 1.001206000  |
| 6  | -1.526342000 | -2.868208000 | 0.718635000  |
| 6  | 0.257436000  | -2.504207000 | 2.517426000  |
| 6  | -1.861381000 | -0.599924000 | 3.810625000  |
| 6  | -4.484026000 | -1.926947000 | 2.793275000  |
| 6  | -3.921756000 | -3.731796000 | 0.349022000  |
| 6  | -0.796107000 | -3.728653000 | -0.264098000 |
| 8  | -4.031409000 | 1.622067000  | -3.242865000 |
| 8  | 0.329954000  | 1.722640000  | -3.084446000 |

|    |              |              |              |
|----|--------------|--------------|--------------|
| 8  | -2.470079000 | -1.917361000 | -2.413406000 |
| 8  | -2.270174000 | 4.085413000  | -0.389304000 |
| 8  | -4.520778000 | 0.674571000  | 0.970600000  |
| 1  | 0.741238000  | -1.764411000 | 3.167380000  |
| 1  | 1.032587000  | -2.970435000 | 1.904674000  |
| 1  | -0.186722000 | -3.281909000 | 3.154945000  |
| 1  | -2.296519000 | -1.159830000 | 4.651893000  |
| 1  | -2.382956000 | 0.367894000  | 3.772350000  |
| 1  | -0.818004000 | -0.391128000 | 4.065120000  |
| 1  | -5.285268000 | -1.768105000 | 2.057747000  |
| 1  | -4.536235000 | -1.110980000 | 3.522197000  |
| 1  | -4.719057000 | -2.866545000 | 3.319358000  |
| 1  | -4.705957000 | -3.093559000 | -0.087951000 |
| 1  | -4.422680000 | -4.382051000 | 1.083201000  |
| 1  | -3.528325000 | -4.367371000 | -0.450588000 |
| 1  | -0.207129000 | -3.150935000 | -0.988393000 |
| 1  | -1.492347000 | -4.350115000 | -0.836899000 |
| 1  | -0.091560000 | -4.405360000 | 0.241687000  |
| 74 | 2.411988000  | -1.005165000 | -0.492702000 |
| 6  | 4.242350000  | -1.286442000 | -1.285287000 |
| 6  | 3.268146000  | -0.834684000 | 1.385187000  |
| 6  | 1.566142000  | -1.329863000 | -2.362458000 |
| 6  | 2.760856000  | 0.996643000  | -0.950501000 |
| 6  | 2.446205000  | -3.051233000 | -0.211509000 |
| 8  | 5.293780000  | -1.437010000 | -1.737580000 |
| 8  | 3.090865000  | 2.045020000  | -1.282946000 |
| 8  | 3.776087000  | -0.806847000 | 2.418116000  |
| 8  | 2.598733000  | -4.187506000 | -0.102653000 |
| 8  | 1.126264000  | -1.555459000 | -3.400016000 |
| 15 | -0.064832000 | -0.497997000 | 0.477840000  |
| 34 | -0.311305000 | 1.440076000  | 1.788735000  |
| 6  | 1.257090000  | 2.562964000  | 1.613655000  |
| 6  | 1.199228000  | 3.741491000  | 0.858324000  |
| 6  | 2.393599000  | 2.269997000  | 2.380586000  |
| 6  | 2.290898000  | 4.612906000  | 0.855206000  |
| 6  | 3.481100000  | 3.145736000  | 2.366810000  |
| 6  | 3.433122000  | 4.315375000  | 1.602362000  |
| 1  | 0.312981000  | 3.987801000  | 0.278782000  |
| 1  | 2.429447000  | 1.370775000  | 2.991915000  |
| 1  | 2.246235000  | 5.525544000  | 0.259925000  |
| 1  | 4.365743000  | 2.911795000  | 2.960551000  |
| 1  | 4.285260000  | 4.996160000  | 1.592107000  |

---

**Cp\*P{W(CO)<sub>5</sub>}<sub>2</sub>·TePh**

|    |              |              |              |
|----|--------------|--------------|--------------|
| 74 | -1.903961000 | 0.903184000  | -1.080920000 |
| 6  | -1.047411000 | -1.785449000 | 1.695286000  |
| 6  | -3.218073000 | 1.408052000  | -2.526322000 |
| 6  | -3.487758000 | 0.925232000  | 0.272568000  |
| 6  | -0.385495000 | 1.093201000  | -2.484952000 |
| 6  | -2.378851000 | -1.015009000 | -1.796101000 |
| 6  | -1.799519000 | 2.964933000  | -0.822360000 |
| 6  | -2.205166000 | -1.189167000 | 2.484138000  |
| 6  | -3.362166000 | -1.776534000 | 2.079780000  |
| 6  | -3.081360000 | -2.760836000 | 1.024186000  |

---

|    |              |              |              |
|----|--------------|--------------|--------------|
| 6  | -1.741378000 | -2.809575000 | 0.793228000  |
| 6  | -0.014313000 | -2.423533000 | 2.638831000  |
| 6  | -2.080198000 | -0.307509000 | 3.698973000  |
| 6  | -4.728088000 | -1.576347000 | 2.662543000  |
| 6  | -4.162851000 | -3.582276000 | 0.390410000  |
| 6  | -1.028513000 | -3.773639000 | -0.101966000 |
| 8  | -3.971304000 | 1.653109000  | -3.364271000 |
| 8  | 0.392193000  | 1.262357000  | -3.309909000 |
| 8  | -2.716228000 | -1.967090000 | -2.334659000 |
| 8  | -1.846365000 | 4.113379000  | -0.801474000 |
| 8  | -4.418397000 | 1.082207000  | 0.926619000  |
| 1  | 0.480395000  | -1.671841000 | 3.266867000  |
| 1  | 0.761059000  | -2.961833000 | 2.088780000  |
| 1  | -0.525321000 | -3.140120000 | 3.297495000  |
| 1  | -2.648482000 | -0.732583000 | 4.539029000  |
| 1  | -2.478811000 | 0.706251000  | 3.539164000  |
| 1  | -1.044153000 | -0.203154000 | 4.037710000  |
| 1  | -5.472249000 | -1.374109000 | 1.878614000  |
| 1  | -4.758597000 | -0.740351000 | 3.369224000  |
| 1  | -5.065760000 | -2.482248000 | 3.191334000  |
| 1  | -4.902293000 | -2.939462000 | -0.112691000 |
| 1  | -4.715896000 | -4.160113000 | 1.147373000  |
| 1  | -3.775807000 | -4.285404000 | -0.353550000 |
| 1  | -0.399174000 | -3.279755000 | -0.853256000 |
| 1  | -1.740284000 | -4.406544000 | -0.642157000 |
| 1  | -0.367162000 | -4.439865000 | 0.471141000  |
| 74 | 2.312918000  | -1.313734000 | -0.438203000 |
| 6  | 4.140436000  | -1.772250000 | -1.146789000 |
| 6  | 3.112643000  | -0.966268000 | 1.438069000  |
| 6  | 1.469911000  | -1.787038000 | -2.277754000 |
| 6  | 2.774897000  | 0.595323000  | -1.128574000 |
| 6  | 2.240984000  | -3.316899000 | 0.059898000  |
| 8  | 5.192471000  | -2.024914000 | -1.550639000 |
| 8  | 3.164938000  | 1.572252000  | -1.589675000 |
| 8  | 3.566956000  | -0.829139000 | 2.487556000  |
| 8  | 2.335838000  | -4.442156000 | 0.287116000  |
| 8  | 1.023387000  | -2.089129000 | -3.292869000 |
| 15 | -0.138975000 | -0.543552000 | 0.452351000  |
| 52 | -0.087388000 | 1.643186000  | 1.812556000  |
| 6  | 1.682450000  | 2.724645000  | 1.256253000  |
| 6  | 1.605459000  | 3.785626000  | 0.343693000  |
| 6  | 2.881173000  | 2.466950000  | 1.937651000  |
| 6  | 2.735572000  | 4.569982000  | 0.097799000  |
| 6  | 4.005502000  | 3.256966000  | 1.683539000  |
| 6  | 3.935457000  | 4.305573000  | 0.762154000  |
| 1  | 0.677286000  | 4.011748000  | -0.176317000 |
| 1  | 2.946127000  | 1.659904000  | 2.665363000  |
| 1  | 2.673622000  | 5.388764000  | -0.619993000 |
| 1  | 4.937284000  | 3.049287000  | 2.211454000  |
| 1  | 4.816277000  | 4.917802000  | 0.563862000  |

---



## **References:**

- [1] *TopSpin 3.0*, TopSpin 3.0, Bruker BioSpin GmbH, **2010**.
- [2] P. Jutzi, R. Kroos, *J. Organomet. Chem.* **1990**, 390, 317.
- [3] P. M. Dickson, M. A. D. McGowan, B. Yearwood, M. J. Heeg, J. P. Oliver, *Journal of Organometallic Chemistry* **1999**, 588, 42.
- [4] W.-W. Du Mont, H.-U. Meyer, S. Kubiniok, S. Pohl, W. Saak, *Chemische Berichte* **1992**, 125, 761.
- [5] O. V. Dolomanov, L. J. Bourhis, R. J. Gildea, J. A. K. Howard, H. Puschmann, *Appl. Crystallogr.* **2009**, 42, 339.
- [6] *CrysAlis Pro 171.38.46*, CrysAlis Pro Version 171.38.46, Rigaku Oxford Diffraction.
- [7] G. Sheldrick, *Acta Crystallogr. Sect. A* **2015**, 71, 3.
- [8] G. M. Sheldrick, *Acta Crystallogr. Sect. C* **2015**, 71, 3.
- [9] a) A. D. Becke, *The Journal of Chemical Physics* **1993**, 98, 5648; b) Lee, Yang, Parr, *Physical review. B, Condensed matter* **1988**, 37, 785.
- [10] a) D. Rappoport, F. Furche, *The Journal of Chemical Physics* **2010**, 133, 134105; b) F. Weigend, R. Ahlrichs, *Physical chemistry chemical physics : PCCP* **2005**, 7, 3297; c) D. Andrae, U. Huermann, M. Dolg, H. Stoll, H. Preu, *Theoret. Chim. Acta* **1990**, 77, 123.
- [11] M. J. Frisch, G. W. Trucks, H. B. Schlegel, G. E. Scuseria, M. A. Robb, J. R. Cheeseman, G. Scalmani, V. Barone, G. A. Petersson, H. Nakatsuji et al., *Gaussian 16 Rev. B.01*, Wallingford, CT, **2016**.
- [12] a) K. L. Schuchardt, B. T. Didier, T. Elsethagen, L. Sun, V. Gurumoorthi, J. Chase, J. Li, T. L. Windus, *Journal of chemical information and modeling* **2007**, 47, 1045; b) D. Feller, *J. Comput. Chem.* **1996**, 17, 1571.
- [13] G. R. Clark, G. J. Palenik, *Aust. J. Chem.* **1975**, 28, 1187.
- [14] K. Wolinski, J. F. Hinton, P. Pulay, *J. Am. Chem. Soc.* **1990**, 112, 8251.
- [15] S. K. Latypov, F. M. Polyancev, D. G. Yakhvarov, O. G. Sinyashin, *Physical chemistry chemical physics : PCCP* **2015**, 17, 6976.
- [16] A. S. Lisovenko, A. Y. Timoshkin, *Inorg. Chem.* **2010**, 49, 10357.
